# Supplementary material for: Transcriptional profiling of a fungal granuloma reveals a low metabolic activity of Paracoccidioides brasiliensis yeasts and an actively regulated host immune response
Source: PubMed Central journal article supplement (PMC10585178; doi:10.3389/fcimb.2023.1268959), 2023-10-05
Supplement: Table_1.pdf [file Table_1.pdf]

**Supplementary Table 1. Genes and primers used for RT-qPCR.**

| Genes                                                        | Forward              | Reverse              |
|--------------------------------------------------------------|----------------------|----------------------|
| <i>Mus musculus</i>                                          |                      |                      |
| Tnnc1 - troponin C                                           | GGGTGTGGAGTAGATGCTGG | ATTTGCGTTCCCCAGGACAG |
| Hamp - hepcidin                                              | GAGAGACACCAACTTCCCCA | GTGGGGAGGGCAGGAATAAA |
| Pdcd1 - programmed cell death 1                              | CTAGAGCCACCCACACATCC | GAGAGCCAGAACCCAACTCC |
| Tnf - tumor necrosis factor                                  | CGGGCAGGTCTACTTTGGAG | ACCCTGAGCCATAATCCCCT |
| Cxcl9 - chemokine (C-X-C motif) ligand 9                     | AACCTTTGGCCTCCTTGCTT | AGGAAGGAAGGCAGGCAATC |
| Gbp2b - guanylate binding protein 2b                         | GTCCTGACTTTGGCCAGAT  | CTCAATGGCCTCCCTCTCAC |
| Usp9x - Probable ubiquitin carboxyl-terminal hydrolase FAF-X | TGGTTTCATTGTAGGGCCCA | ACCTGAAAGCTTGGAGGACA |
| Lcn2 - Lipocalin 2                                           | ACTGAATGGGTGGTGAGTGT | GGGAGTGCTGGCCAAATAAG |
| <i>Paracoccidioides brasiliensis</i>                         |                      |                      |
| PADG_00104 (Oxidoreductase OXR1)                             | TCGCAGCTGAGTTGAAAATG | CACCCTCCTTCGACTGTGTT |
| PADG_00097 (L-ornithine N5-oxygenase SidA)                   | GAGGAGAGCGAGCTATTCCA | ATTTCAACCGCACTCTGACC |
| PADG_00099 (Acyl-CoA ligase SIDI)                            | TGGTGATCGAATGGACTTCA | CGTGTAGTGCTGTGCACCTT |
| PADG_05660 (fungal nitric oxide reductase)                   | AAAGCAGGGGAAGGCATAAT | CAGTACGAGCCAACCACTCA |
| PADG_01954 (superoxide dismutase, Fe-Mn family)              | AACAAGGCCCTTCAAGATCA | GCCTCAATCTTCGTCTCTGG |
| PADG_00714 (Pyruvate decarboxylase)                          | CCGACTTCAACACAACAGGG | TTGCAATTTTCGGGATGGGG |
