# Supplementary material for: Transcriptional profiling of a fungal granuloma reveals a low metabolic activity of Paracoccidioides brasiliensis yeasts and an actively regulated host immune response
Source: PubMed Central journal article supplement (PMC10585178; doi:10.3389/fcimb.2023.1268959), 2023-10-05
Supplement: Table_2.pdf [file Table_2.pdf]

**Supplementary Table 2. Upregulated mice genes.**

| Accession number                                     | Protein                                              | Expression status | Log (Fold Change) | Adjusted p-value |
|------------------------------------------------------|------------------------------------------------------|-------------------|-------------------|------------------|
| <b>PRRs and other receptors</b>                      |                                                      |                   |                   |                  |
| Clec4a2                                              | C-type lectin domain family 4, member a2             | UP(D)             | 2,118637          | 1,62673E-05      |
| Clec4n                                               | C-type lectin domain family 6 member A               | UP(D)             | 2,078333          | 3,77685E-05      |
| Ms4a7                                                | membrane-spanning 4-domains subfamily A member 5/6/7 | UP(D)             | 2,057576          | 3,89263E-05      |
| Clec7a                                               | C-type lectin domain family 7 member A               | UP(D)             | 2,020814          | 3,0056E-05       |
| Tlr2                                                 | toll-like receptor 2                                 | UP(D)             | 1,960263          | 2,91576E-05      |
| Ms4a6d                                               | membrane-spanning 4-domains subfamily A member 5/6/7 | UP(D)             | 1,952377          | 1,23965E-05      |
| Tlr13                                                | toll-like receptor 13                                | UP(D)             | 1,903147          | 3,02766E-05      |
| Clec4d                                               | C-type lectin domain family 4 member D               | UP(D)             | 1,868473          | 0,000104122      |
| Ptx3                                                 | Pentraxin-related protein PTX3                       | UP(D)             | 1,851374          | 2,5485E-05       |
| Cd14                                                 | monocyte differentiation antigen CD14                | UP(D)             | 1,846054          | 4,36701E-05      |
| Raet1d                                               | retinoic acid early transcript 1                     | UP(D)             | 1,757167          | 1,85594E-05      |
| Clec4e                                               | C-type lectin domain family 4 member E               | UP(D)             | 1,715215          | 5,88412E-05      |
| Cd68                                                 | CD68 antigen                                         | UP(D)             | 1,338493          | 0,001331954      |
| Clec5a                                               | C-type lectin domain family 5 member A               | UP(D)             | 1,285129          | 0,000550618      |
| Marco                                                | macrophage receptor with collagenous structure       | UP(12)            | 1,176102          | 0,023211938      |
| Clec12a                                              | C-type lectin domain family 12, member a             | UP(12)            | 1,068438          | 0,000333106      |
| Clec4b1                                              | C-type lectin domain family 4, member b1             | UP(D)             | 1,068106          | 2,24706E-05      |
| <b>Cell adhesion, activation and differentiation</b> |                                                      |                   |                   |                  |
| Cd52                                                 | CDW52 antigen                                        | UP(D)             | 2,227853          | 1,29423E-05      |
| Fpr2                                                 | formyl peptide receptor-like                         | UP(D)             | 2,224199          | 3,4629E-05       |
| Lgals3                                               | galectin-3                                           | UP(D)             | 2,113594          | 2,269E-05        |
| Gpr15                                                | G protein-coupled receptor 15                        | UP(D)             | 2,086638          | 3,18579E-05      |
| Rgs1                                                 | regulator of G-protein signaling                     | UP(D)             | 2,060517          | 2,25836E-05      |
| Mzb1                                                 | marginal zone B and B1 cell-specific protein 1       | UP(D)             | 2,007265          | 2,24691E-05      |
| Bst1                                                 | Bone marrow stromal cell antigen 1                   | UP(D)             | 1,996828          | 3,23405E-05      |
| Cd300c2                                              | CD300 antigen                                        | UP(D)             | 1,725508          | 5,96672E-05      |
| Clmp                                                 | adipocyte-specific adhesion molecule                 | UP(D)             | 1,678447          | 5,53956E-05      |
| Retnlg                                               | resistin                                             | UP(D)             | 1,619956          | 4,07094E-05      |
| Trem3                                                | Triggering receptor expressed on myeloid cells 3     | UP(D)             | 1,611529          | 8,33298E-06      |
| Trem1                                                | triggering receptor expressed on myeloid cells 1     | UP(D)             | 1,408704          | 0,002771287      |
| Chil3                                                | chitinase 3-like 3/4                                 | UP(D)             | 1,221064          | 0,000310931      |
| Cd177                                                | CD177 antigen                                        | UP(D)             | 1,202699          | 0,000194434      |
| Agr2                                                 | anterior gradient protein 2                          | UP(8)             | 1,164057          | 0,00134062       |
| Cdhr1                                                | cadherin-related family member 1                     | UP(D)             | 1,14626           | 1,82092E-05      |
| Chil4                                                | chitinase 3-like 3/4                                 | UP(D)             | 1,136736          | 7,62846E-05      |
| S100a9                                               | protein S100-A9                                      | UP(D)             | 1,127137          | 2,63106E-05      |
| Tff2                                                 | trefoil factor 2                                     | UP(8)             | 1,113102          | 0,004094218      |
| S100a8                                               | protein S100-A8                                      | UP(D)             | 1,10375           | 0,001126456      |
| Frzb                                                 | Secreted frizzled-related protein 3                  | UP(8)             | 1,034516          | 0,002420513      |
| Nuggc                                                | Nuclear GTPase SLIP-GC                               | UP(D)             | 1,005003          | 3,32055E-05      |
| <b>Pro-inflammatory and complement system</b>        |                                                      |                   |                   |                  |
| Gbp2b                                                | Guanylate-binding protein 2b                         | UP(D)             | 2,872045          | 4,60703E-05      |

|                                 |                                                                    |        |          |             |
|---------------------------------|--------------------------------------------------------------------|--------|----------|-------------|
| Camp                            | cathelicidin antimicrobial peptide                                 | UP(D)  | 2,319225 | 0,000175036 |
| Saa3                            | serum amyloid A protein                                            | UP(D)  | 2,044481 | 2,29959E-05 |
| Nos2                            | nitric-oxide synthase, inducible [EC:1.14.13.39]                   | UP(D)  | 2,033614 | 3,01129E-05 |
| Gbp5                            | guanylate-binding protein 5                                        | UP(D)  | 2,027516 | 1,7783E-05  |
| C1qa                            | Complement C1q subcomponent subunit A                              | UP(D)  | 2,025756 | 1,63519E-05 |
| Aif1                            | allograft inflammatory factor 1                                    | UP(D)  | 2,025499 | 0,000362794 |
| Cfb                             | complement factor B [EC:3.4.21.47]                                 | UP(D)  | 1,935486 | 2,76615E-05 |
| Tarm1                           | T-cell-interacting, activating receptor on myeloid cells protein 1 | UP(D)  | 1,931302 | 3,84086E-05 |
| Cybb                            | NADPH oxidase 2 [EC:1.-.-.]                                        | UP(D)  | 1,775452 | 6,72975E-05 |
| Pfpl                            | Macrophage-expressed gene 1 protein                                | UP(D)  | 1,758943 | 4,6842E-05  |
| C1qc                            | complement C1q subcomponent subunit C                              | UP(D)  | 1,729555 | 0,000173539 |
| Saa1                            | serum amyloid A protein                                            | UP(D)  | 1,684414 | 3,40102E-05 |
| C3ar1                           | C3a anaphylatoxin chemotactic receptor                             | UP(D)  | 1,615371 | 8,46996E-05 |
| Clca1                           | Calcium-activated chloride channel regulator 1                     | UP(8)  | 1,438976 | 0,025102437 |
| Pilra                           | Paired immunoglobulin-like type 2 receptor alpha                   | UP(D)  | 1,401804 | 0,00025608  |
| C1qb                            | complement C1q subcomponent subunit B                              | UP(D)  | 1,346731 | 0,000137816 |
| Saa2                            | serum amyloid A protein                                            | UP(D)  | 1,284467 | 0,000676768 |
| Cd300ld                         | CMRF35-like molecule 5                                             | UP(8)  | 1,049027 | 7,72548E-07 |
| Pilrb1                          | Paired immunoglobulin-like type 2 receptor beta-1                  | UP(12) | 1,020848 | 4,51687E-05 |
| Pilrb2                          | Paired immunoglobulin-like type 2 receptor beta-2                  | UP(12) | 1,008983 | 7,17385E-05 |
| <b>Cytokines and chemokines</b> |                                                                    |        |          |             |
| Cxcl9                           | C-X-C motif chemokine 9                                            | UP(D)  | 2,2741   | 1,44765E-05 |
| Il1f9                           | Interleukin-36 gamma                                               | UP(D)  | 2,253036 | 1,56045E-05 |
| Ccl20                           | C-C motif chemokine 20                                             | UP(D)  | 2,103374 | 4,42457E-05 |
| Cxcl1                           | C-X-C motif chemokine 1/2/3                                        | UP(D)  | 2,073216 | 0,000421378 |
| Ccl2                            | C-C motif chemokine 2                                              | UP(D)  | 2,069786 | 1,95456E-05 |
| Ccl7                            | C-C motif chemokine 7                                              | UP(D)  | 2,057447 | 2,18951E-05 |
| Cxcl10                          | C-X-C motif chemokine 10                                           | UP(D)  | 2,011544 | 8,14464E-05 |
| Cxcl13                          | C-X-C motif chemokine 13                                           | UP(D)  | 1,95105  | 1,26832E-05 |
| Ccr1                            | C-C chemokine receptor type 1                                      | UP(D)  | 1,946485 | 6,0567E-05  |
| Tnf                             | tumor necrosis factor superfamily, member 2                        | UP(D)  | 1,930536 | 1,23067E-05 |
| Il1b                            | interleukin 1 beta                                                 | UP(D)  | 1,895732 | 7,86476E-05 |
| Ccl8                            | C-C motif chemokine 8                                              | UP(D)  | 1,886362 | 2,85292E-05 |
| Il1a                            | interleukin 1 alpha                                                | UP(D)  | 1,850909 | 7,78257E-06 |
| Spp1                            | Osteopontin                                                        | UP(D)  | 1,739861 | 3,3628E-05  |
| Tnfrsf17                        | tumor necrosis factor receptor superfamily member 17               | UP(D)  | 1,714299 | 1,64858E-05 |
| Ccl3                            | C-C motif chemokine 3                                              | UP(D)  | 1,319954 | 0,000204104 |
| Tnfrsf9                         | tumor necrosis factor receptor superfamily member 9                | UP(D)  | 1,266412 | 3,22183E-05 |
| Cxcl2                           | C-X-C motif chemokine 1/2/3                                        | UP(D)  | 1,208573 | 0,00046053  |
| Il1r2                           | interleukin 1 receptor type II                                     | UP(D)  | 1,163824 | 4,2785E-05  |
| Ccl6                            | C-C motif chemokine 6                                              | UP(D)  | 1,161484 | 1,38757E-05 |
| Cxcl5                           | C-X-C motif chemokine 5/6                                          | UP(D)  | 1,114359 | 2,20334E-05 |
| Ccl12                           | C-C motif chemokine 2                                              | UP(D)  | 1,10909  | 2,27909E-05 |
| Ifng                            | interferon gamma                                                   | UP(8)  | 1,105272 | 0,001061971 |
| Ccl4                            | C-C motif chemokine 4                                              | UP(D)  | 1,103517 | 3,92212E-05 |
| Tnfrsf8                         | Tumor necrosis factor receptor superfamily member 8                | UP(8)  | 1,095759 | 0,000679234 |

|                                            |                                               |       |          |             |
|--------------------------------------------|-----------------------------------------------|-------|----------|-------------|
| Cxcr1                                      | C-X-C chemokine receptor type 1               | UP(D) | 1,081081 | 0,000307102 |
| Ccl9                                       | C-C motif chemokine 9                         | UP(D) | 1,070775 | 0,002911195 |
| Ccr5                                       | C-C chemokine receptor type 5                 | UP(8) | 1,066194 | 0,000570019 |
| <b>Antigen processing and presentation</b> |                                               |       |          |             |
| H2-M2                                      | Histocompatibility 2, M region locus 2        | UP(D) | 1,964557 | 3,04312E-05 |
| Iigp1                                      | Interferon-inducible GTPase 1                 | UP(D) | 1,9352   | 1,23135E-05 |
| Dcstamp                                    | Dendritic cell-specific transmembrane protein | UP(D) | 1,137807 | 1,51978E-05 |
| <b>Antobody</b>                            |                                               |       |          |             |
| Ighv1-47                                   | Immunoglobulin heavy variable 1-47            | UP(D) | 2,702582 | 4,18565E-05 |
| Ighv7-4                                    | Immunoglobulin heavy variable 7-4             | UP(D) | 2,591917 | 2,20979E-05 |
| Igkv3-11                                   | Immunoglobulin kappa variable 3-11            | UP(D) | 2,468751 | 1,398E-05   |
| Ighv5-15                                   | Immunoglobulin heavy variable 5-15            | UP(D) | 2,463992 | 4,51892E-05 |
| Ighv1-80                                   | Immunoglobulin heavy variable 1-80            | UP(D) | 2,452668 | 4,49753E-05 |
| Ighv1-56                                   | Immunoglobulin heavy variable 1-56            | UP(D) | 2,417073 | 2,54059E-05 |
| Ighv7-3                                    | Immunoglobulin heavy variable 7-3             | UP(D) | 2,400919 | 5,00508E-05 |
| Ighv6-6                                    | Immunoglobulin heavy variable 6-6             | UP(D) | 2,373259 | 0,000175154 |
| Ighv1-26                                   | Immunoglobulin heavy variable 1-26            | UP(D) | 2,340892 | 7,64951E-05 |
| Igkv3-7                                    | Immunoglobulin kappa variable 3-7             | UP(D) | 2,313811 | 3,14871E-05 |
| Ighv5-17                                   | Immunoglobulin heavy variable 5-17            | UP(D) | 2,297423 | 2,41942E-05 |
| Ighv1-85                                   | Immunoglobulin heavy variable 1-85            | UP(D) | 2,269718 | 1,21416E-05 |
| Igkv3-8                                    | Immunoglobulin kappa variable 3-8             | UP(D) | 2,24059  | 1,79182E-05 |
| Igha                                       | Immunoglobulin heavy constant alpha           | UP(D) | 2,233271 | 2,43913E-05 |
| Ighv1-32                                   | Immunoglobulin heavy variable 1-32            | UP(D) | 2,223415 | 1,83593E-05 |
| Igkv4-59                                   | Immunoglobulin kappa variable 4-59            | UP(D) | 2,219996 | 0,000649463 |
| Ighv1-39                                   | Immunoglobulin heavy variable 1-39            | UP(D) | 2,219915 | 3,9045E-05  |
| Ighv5-4                                    | Immunoglobulin heavy variable 5-4             | UP(D) | 2,218446 | 0,000354697 |
| Ighv1-37                                   | Immunoglobulin heavy variable 1-37            | UP(D) | 2,20106  | 4,26797E-05 |
| Igkv13-84                                  | Immunoglobulin kappa chain variable 13-84     | UP(D) | 2,19989  | 4,72581E-05 |
| Ighv2-6                                    | Immunoglobulin heavy variable 2-6             | UP(D) | 2,183847 | 3,71037E-05 |
| Igkv4-80                                   | Immunoglobulin kappa variable 4-80            | UP(D) | 2,175198 | 2,24461E-05 |
| Ighv9-4                                    | Immunoglobulin heavy variable 9-4             | UP(D) | 2,168834 | 1,40392E-05 |
| Igkv3-4                                    | Immunoglobulin kappa variable 3-4             | UP(D) | 2,164317 | 3,63617E-05 |
| Igkv10-95                                  | Immunoglobulin kappa variable 10-95           | UP(D) | 2,164143 | 1,56062E-05 |
| Ighv2-4                                    | Immunoglobulin heavy variable V2-4            | UP(D) | 2,152911 | 1,22629E-05 |
| Igkv3-2                                    | Immunoglobulin kappa variable 3-2             | UP(D) | 2,143267 | 1,39763E-05 |
| Ighv10-1                                   | Immunoglobulin heavy variable 10-1            | UP(D) | 2,139018 | 1,79674E-05 |
| Igkv3-1                                    | Immunoglobulin kappa variable 3-1             | UP(D) | 2,137117 | 1,11766E-05 |
| Ighv1-43                                   | Immunoglobulin heavy variable V1-43           | UP(D) | 2,133713 | 2,27735E-05 |
| Igkv10-96                                  | Immunoglobulin kappa variable 10-96           | UP(D) | 2,123301 | 2,85705E-05 |
| Ighv1-69                                   | Immunoglobulin heavy variable 1-69            | UP(D) | 2,111835 | 4,70575E-05 |
| Ighv8-14                                   | Immunoglobulin heavy variable 8-13            | UP(D) | 2,11051  | 0,000108458 |
| Ighv1-4                                    | Immunoglobulin heavy variable 1-4             | UP(D) | 2,110384 | 2,67013E-05 |
| Ighv10-3                                   | Immunoglobulin heavy variable V10-3           | UP(D) | 2,109727 | 0,000103493 |
| Igkv6-29                                   | Immunoglobulin kappa chain variable 6-29      | UP(D) | 2,108656 | 2,1717E-05  |
| Igkv14-100                                 | Immunoglobulin kappa chain variable 14-100    | UP(D) | 2,103544 | 1,72872E-05 |
| Ighv1-62-3                                 | Ig heavy chain V region 1-62-3                | UP(D) | 2,101752 | 0,000178754 |

|            |                                           |       |          |             |
|------------|-------------------------------------------|-------|----------|-------------|
| Igkv6-20   | Immunoglobulin kappa variable 6-20        | UP(D) | 2,100655 | 1,90792E-05 |
| Igkv5-39   | Immunoglobulin kappa variable 5-39        | UP(D) | 2,09464  | 4,91528E-05 |
| Ighv1-74   | Immunoglobulin heavy variable V1-74       | UP(D) | 2,094476 | 2,07072E-05 |
| Ighv1-77   | Immunoglobulin heavy variable 1-77        | UP(D) | 2,086679 | 1,72005E-05 |
| Ighv1-82   | Immunoglobulin heavy variable 1-82        | UP(D) | 2,086285 | 1,61842E-05 |
| Igkv13-85  | Immunoglobulin kappa chain variable 13-85 | UP(D) | 2,083985 | 1,45588E-05 |
| Igkv5-48   | Ig kappa chain V-V region L7              | UP(D) | 2,083877 | 4,73861E-05 |
| Igkv1-115  | Immunoglobulin kappa variable 1-99        | UP(D) | 2,080784 | 2,13978E-05 |
| Ighv6-5    | Immunoglobulin heavy variable V6-5        | UP(D) | 2,078298 | 3,25211E-05 |
| Ighv1-52   | Immunoglobulin heavy variable 1-52        | UP(D) | 2,075601 | 1,85229E-05 |
| Ighv1-70   | Immunoglobulin heavy variable 1-70        | UP(D) | 2,075272 | 4,70942E-05 |
| Igkv4-92   | Immunoglobulin kappa variable 4-92        | UP(D) | 2,072162 | 1,60065E-05 |
| Igkv4-62   | Immunoglobulin kappa variable 4-62        | UP(D) | 2,069767 | 1,29002E-05 |
| Igkv5-40-1 | Immunoglobulin kappa variable 5-40-1      | UP(D) | 2,068266 | 8,08931E-05 |
| Ighv6-7    | Immunoglobulin heavy variable V6-7        | UP(D) | 2,063071 | 4,69098E-05 |
| Ighv5-1    | Immunoglobulin heavy variable 5-1         | UP(D) | 2,061682 | 7,41565E-06 |
| Ighv1-55   | Immunoglobulin heavy variable 1-55        | UP(D) | 2,05409  | 0,000263588 |
| Ighv1-66   | Immunoglobulin heavy variable 1-66        | UP(D) | 2,053211 | 2,85323E-05 |
| Ighv14-4   | Immunoglobulin heavy variable 14-4        | UP(D) | 2,05137  | 3,78784E-05 |
| Igkv8-34   | Immunoglobulin kappa variable 8-34        | UP(D) | 2,047021 | 2,91859E-05 |
| Ighv1-84   | Immunoglobulin heavy variable 1-84        | UP(D) | 2,044093 | 1,69041E-05 |
| Igkv4-50   | Immunoglobulin kappa variable 4-50        | UP(D) | 2,033523 | 2,34426E-05 |
| Ighv1-33   | Immunoglobulin heavy variable 1-33        | UP(D) | 2,029047 | 8,40413E-05 |
| Igkv9-123  | Immunoglobulin kappa variable 9-123       | UP(D) | 2,025056 | 3,14152E-05 |
| Ighv2-2    | Immunoglobulin heavy variable 2-2         | UP(D) | 2,024781 | 1,2994E-05  |
| Igkv5-43   | Immunoglobulin kappa chain variable 5-43  | UP(D) | 2,023984 | 2,62565E-05 |
| Ighv3-7    | Immunoglobulin heavy variable 3-7         | UP(D) | 2,017776 | 0,000104341 |
| Ighv1-22   | Immunoglobulin heavy variable 1-22        | UP(D) | 2,007573 | 1,24414E-05 |
| Ighv2-5    | Immunoglobulin heavy variable 2-5         | UP(D) | 2,003811 | 1,24937E-05 |
| Ighv1-21-1 | Immunoglobulin heavy variable 1-21-1      | UP(D) | 2,002292 | 5,28196E-05 |
| Ighv1-36   | Immunoglobulin heavy variable 1-36        | UP(D) | 2,001255 | 4,62177E-05 |
| Ighv1-25   | Immunoglobulin kappa variable 1-25        | UP(D) | 1,999181 | 1,21249E-05 |
| Ighv1-59   | Immunoglobulin heavy variable V1-59       | UP(D) | 1,998215 | 3,89883E-05 |
| Ighv1-76   | Immunoglobulin heavy variable 1-76        | UP(D) | 1,997389 | 5,44329E-05 |
| Ighv14-2   | Immunoglobulin heavy variable 14-2        | UP(D) | 1,996771 | 6,17544E-05 |
| Ighv1-12   | Immunoglobulin heavy variable V1-12       | UP(D) | 1,995246 | 3,33483E-05 |
| Igkv17-134 | Immunoglobulin kappa variable 17-134      | UP(D) | 1,993742 | 4,61496E-05 |
| Igkv4-79   | Immunoglobulin kappa variable 4-79        | UP(D) | 1,99112  | 1,11578E-05 |
| Igkv19-93  | Immunoglobulin kappa chain variable 19-93 | UP(D) | 1,990508 | 2,55746E-05 |
| Igkv3-5    | Immunoglobulin kappa chain variable 3-5   | UP(D) | 1,986897 | 2,08651E-05 |
| Ighv5-16   | Immunoglobulin heavy variable 5-16        | UP(D) | 1,986013 | 0,000490023 |
| Igkv4-58   | Immunoglobulin kappa variable 4-58        | UP(D) | 1,984759 | 4,53065E-05 |
| Igkv5-45   | Immunoglobulin kappa chain variable 5-45  | UP(D) | 1,979461 | 4,72959E-05 |
| Igkv1-117  | Immunoglobulin kappa variable 1-117       | UP(D) | 1,976239 | 4,62935E-05 |
| Igkv1-108  | Immunoglobulin kappa variable 1-108       | UP(D) | 1,976095 | 4,54967E-05 |
| Ighv15-2   | Immunoglobulin heavy variable V15-2       | UP(D) | 1,972091 | 2,79147E-05 |

|            |                                                              |       |          |             |
|------------|--------------------------------------------------------------|-------|----------|-------------|
| Ighv7-2    | Immunoglobulin heavy variable 7-2                            | UP(D) | 1,969074 | 2,96333E-05 |
| Ighv9-3    | Immunoglobulin heavy variable V9-3                           | UP(D) | 1,968117 | 1,58436E-05 |
| Igkv4-65   | Immunoglobulin kappa chain variable 4-65                     | UP(D) | 1,96693  | 3,70924E-05 |
| Ighv1-18   | Immunoglobulin heavy variable V1-18                          | UP(D) | 1,964458 | 7,66873E-05 |
| Ighv3-6    | Ig heavy chain V region 3-6                                  | UP(D) | 1,960099 | 3,81438E-05 |
| Ighv3-8    | Immunoglobulin heavy variable V3-8                           | UP(D) | 1,958354 | 0,000132198 |
| Igkv8-28   | Immunoglobulin kappa variable 8-28                           | UP(D) | 1,955236 | 0,000102195 |
| Ighv1-75   | Immunoglobulin heavy variable 1-75                           | UP(D) | 1,95061  | 7,82712E-05 |
| Ighv1-17   | Immunoglobulin heavy variable 1-17                           | UP(D) | 1,948285 | 1,32175E-05 |
| Igkv12-41  | Immunoglobulin heavy variable 12-41                          | UP(D) | 1,947874 | 2,27296E-05 |
| Igkv8-19   | Immunoglobulin kappa variable 8-19                           | UP(D) | 1,946527 | 2,00559E-05 |
| Igkv12-46  | Immunoglobulin kappa variable 12-46                          | UP(D) | 1,943494 | 7,86856E-05 |
| Igkv4-54   | Immunoglobulin kappa chain variable 4-54                     | UP(D) | 1,939039 | 3,78941E-05 |
| Igkv12-40  | Immunoglobulin heavy variable 12-40                          | UP(D) | 1,936221 | 0,000165339 |
| Igkv12-44  | Immunoglobulin kappa variable 12-44                          | UP(D) | 1,934594 | 5,06264E-05 |
| Ighv1-50   | Immunoglobulin heavy variable 1-50                           | UP(D) | 1,932819 | 0,000159461 |
| Ighv1-2    | Immunoglobulin heavy variable 1-2                            | UP(D) | 1,928345 | 6,33521E-05 |
| Ighv1-61   | Ig heavy chain V region 3                                    | UP(D) | 1,928332 | 2,27256E-05 |
| Ighv5-6    | Immunoglobulin heavy variable 5-6                            | UP(D) | 1,92394  | 2,24444E-05 |
| Igkc       | Immunoglobulin kappa constant                                | UP(D) | 1,918386 | 7,82879E-05 |
| Igkv3-12   | Immunoglobulin kappa variable 3-12                           | UP(D) | 1,917397 | 1,72005E-05 |
| Ighv9-2    | Immunoglobulin heavy variable 9-2                            | UP(D) | 1,905901 | 1,23135E-05 |
| Igkv9-124  | Immunoglobulin kappa chain variable 9-124                    | UP(D) | 1,898092 | 8,20352E-05 |
| Ighv1-27   | Immunoglobulin heavy variable 1-27                           | UP(D) | 1,891259 | 0,000155784 |
| Ighv14-1   | Immunoglobulin heavy variable 14-1                           | UP(D) | 1,881154 | 1,94369E-05 |
| Ighv1-31   | Immunoglobulin heavy variable 1-31                           | UP(D) | 1,879359 | 5,74218E-05 |
| Ighv1-38   | Probable non-functional immunoglobulin heavy variable 1-38-4 | UP(D) | 1,876343 | 2,84354E-05 |
| Igkv3-9    | Immunoglobulin kappa variable 3-9                            | UP(D) | 1,875846 | 6,20453E-05 |
| Igkv4-57   | Immunoglobulin kappa variable 4-57                           | UP(D) | 1,874248 | 2,77027E-05 |
| Iglc1      | Immunoglobulin lambda constant 1                             | UP(D) | 1,868199 | 0,000195941 |
| Igkv8-27   | Immunoglobulin kappa chain variable 8-27                     | UP(D) | 1,866328 | 4,08991E-05 |
| Igkv1-110  | Immunoglobulin kappa variable 1-110                          | UP(D) | 1,853703 | 2,1549E-05  |
| Igkv5-37   | Immunoglobulin kappa variable 5-37                           | UP(D) | 1,853429 | 5,00365E-05 |
| Igkv3-10   | Immunoglobulin kappa variable 3-10                           | UP(D) | 1,853411 | 2,46049E-05 |
| Igkv17-127 | Immunoglobulin kappa variable 17-127                         | UP(D) | 1,847779 | 2,06242E-05 |
| Ighv5-9    | Immunoglobulin heavy variable 5-9                            | UP(D) | 1,844385 | 7,92255E-06 |
| Igkv6-17   | Immunoglobulin kappa variable 6-17                           | UP(D) | 1,840901 | 3,41047E-05 |
| Ighv1-21   | Immunoglobulin heavy variable 1-21-1                         | UP(D) | 1,838058 | 8,44706E-05 |
| Ighv1-81   | Immunoglobulin heavy variable 1-81                           | UP(D) | 1,832813 | 1,33484E-05 |
| Ighv1-78   | Immunoglobulin heavy variable 1-78                           | UP(D) | 1,82919  | 4,12158E-05 |
| Igkv9-120  | Ig kappa chain V-V region MOPC 41                            | UP(D) | 1,827616 | 4,15864E-05 |
| Ighv14-3   | Immunoglobulin heavy variable V14-3                          | UP(D) | 1,825134 | 4,22443E-05 |
| Ighv1-34   | Immunoglobulin heavy variable 1-34                           | UP(D) | 1,824994 | 0,000170463 |
| Ighv2-6-8  | Immunoglobulin heavy variable 2-6-8                          | UP(D) | 1,823368 | 1,19409E-05 |
| Iglc4      | Immunoglobulin lambda constant 4                             | UP(D) | 1,814971 | 1,12931E-05 |
| Igkv8-26   | Immunoglobulin kappa variable 8-26                           | UP(D) | 1,814224 | 3,9734E-05  |

|            |                                            |       |          |             |
|------------|--------------------------------------------|-------|----------|-------------|
| Ighv1-30   | Immunoglobulin heavy variable 1-30         | UP(D) | 1,808748 | 0,001250152 |
| Ighv1-62   | Ig heavy chain V region 1-62-3             | UP(D) | 1,792005 | 2,75376E-05 |
| Igkv4-57-1 | Immunoglobulin kappa variable 4-57-1       | UP(D) | 1,789106 | 1,35837E-05 |
| Igkv4-81   | Immunoglobulin kappa variable 4-81         | UP(D) | 1,78826  | 0,000231116 |
| Ighv1-9    | Immunoglobulin heavy variable V1-9         | UP(D) | 1,774702 | 0,000134759 |
| Igkv4-78   | Immunoglobulin kappa variable 4-78         | UP(D) | 1,769766 | 5,69201E-05 |
| Ighv1-19   | Immunoglobulin heavy variable V1-19        | UP(D) | 1,769326 | 2,0637E-05  |
| Igkv17-121 | Immunoglobulin kappa variable 17-121       | UP(D) | 1,752632 | 0,000171027 |
| Ighv1-15   | Immunoglobulin heavy variable 1-15         | UP(D) | 1,744905 | 0,004259293 |
| Igkv8-21   | Immunoglobulin kappa variable 8-21         | UP(D) | 1,735988 | 9,63148E-05 |
| Ighv2-3    | Immunoglobulin heavy variable 2-3          | UP(D) | 1,721498 | 1,44164E-05 |
| Ighv5-12   | Immunoglobulin heavy variable 5-12         | UP(D) | 1,713431 | 3,44746E-05 |
| Igkv3-3    | Immunoglobulin kappa variable 3-3          | UP(D) | 1,683577 | 0,000101717 |
| Ighv8-8    | Immunoglobulin heavy variable 8-8          | UP(D) | 1,646881 | 4,6526E-05  |
| Ighv1-7    | Immunoglobulin heavy variable V1-7         | UP(D) | 1,638951 | 6,0072E-05  |
| Igkv6-32   | Immunoglobulin kappa variable 6-32         | UP(D) | 1,637352 | 2,01761E-05 |
| Ighv1-28   | Immunoglobulin heavy variable 1-28         | UP(D) | 1,637233 | 1,33484E-05 |
| Ighv2-9    | Immunoglobulin heavy variable 2-9          | UP(D) | 1,630883 | 2,24268E-05 |
| Ighv1-5    | Immunoglobulin heavy variable V1-5         | UP(D) | 1,62865  | 0,000229915 |
| Igkv4-55   | Immunoglobulin kappa variable 4-55         | UP(D) | 1,627099 | 0,000442916 |
| Igkv4-90   | Immunoglobulin kappa chain variable 4-90   | UP(D) | 1,627008 | 0,00010704  |
| Ighv1-86   | Immunoglobulin kappa variable 1-86         | UP(D) | 1,616125 | 9,02684E-05 |
| Igkj5      | Immunoglobulin kappa joining 5             | UP(D) | 1,60611  | 4,93765E-05 |
| Ighv1-63   | Immunoglobulin heavy variable V1-63        | UP(D) | 1,600555 | 0,000286222 |
| Igkj1      | Immunoglobulin kappa joining 1             | UP(D) | 1,595506 | 7,70735E-05 |
| Igsf6      | NA                                         | UP(D) | 1,594943 | 0,000182565 |
| Ighv1-64   | Immunoglobulin heavy variable 1-64         | UP(D) | 1,594637 | 0,001016654 |
| Igkv4-68   | Immunoglobulin kappa variable 4-68         | UP(D) | 1,594111 | 3,03335E-05 |
| Igkv2-116  | Immunoglobulin heavy variable 2-116        | UP(D) | 1,584057 | 1,37053E-05 |
| Ighv8-13   | Immunoglobulin heavy variable 8-13         | UP(D) | 1,58303  | 1,50499E-05 |
| Ighv5-9-1  | Immunoglobulin heavy variable 5-9-1        | UP(D) | 1,57329  | 1,23135E-05 |
| Ighv1-73   | Immunoglobulin heavy variable 1-73         | UP(D) | 1,56084  | 5,68825E-05 |
| Ighv1-83   | Immunoglobulin heavy variable 1-83         | UP(D) | 1,554823 | 0,000357687 |
| Ighv1-71   | Immunoglobulin heavy variable 1-71         | UP(D) | 1,550219 | 0,000124902 |
| Ighv1-20   | Immunoglobulin heavy variable V1-20        | UP(D) | 1,549851 | 7,41565E-06 |
| Igkv10-94  | Immunoglobulin kappa variable 10-94        | UP(D) | 1,528881 | 3,10885E-05 |
| Igkv15-103 | Immunoglobulin kappa chain variable 15-103 | UP(D) | 1,520912 | 3,07306E-05 |
| Igkv4-74   | Immunoglobulin kappa variable 4-74         | UP(D) | 1,519513 | 0,010136701 |
| Ighv8-9    | Immunoglobulin heavy variable V8-9         | UP(D) | 1,509825 | 0,00029336  |
| Igkv4-77   | Immunoglobulin kappa variable 4-77         | UP(D) | 1,505421 | 6,80698E-05 |
| Ighv4-1    | Immunoglobulin heavy variable 4-1          | UP(D) | 1,504017 | 0,00017205  |
| Igkv14-126 | Immunoglobulin kappa variable 14-126       | UP(D) | 1,493909 | 0,001119296 |
| Igkv1-122  | Immunoglobulin kappa chain variable 1-122  | UP(D) | 1,489952 | 3,9252E-05  |
| Ighv2-9-1  | Immunoglobulin heavy variable 2-9-1        | UP(D) | 1,486335 | 0,000131473 |
| Ighv6-3    | Immunoglobulin heavy variable 6-3          | UP(D) | 1,480372 | 2,30539E-05 |
| Igkv1-35   | Immunoglobulin kappa variable 1-35         | UP(D) | 1,437979 | 4,84414E-05 |

|            |                                             |       |          |             |
|------------|---------------------------------------------|-------|----------|-------------|
| Ighv1-53   | Immunoglobulin heavy variable 1-53          | UP(D) | 1,435702 | 2,9713E-05  |
| Iglv2      | Immunoglobulin lambda variable 2            | UP(D) | 1,435017 | 3,88761E-06 |
| Igkv4-63   | Immunoglobulin kappa variable 4-63          | UP(D) | 1,424475 | 0,003100021 |
| Igkv4-72   | Immunoglobulin kappa chain variable 4-72    | UP(D) | 1,420407 | 0,002554132 |
| Igkv1-132  | Immunoglobulin kappa variable 1-132         | UP(D) | 1,401539 | 1,28962E-05 |
| Igkv1-133  | Immunoglobulin kappa variable 1-133         | UP(D) | 1,353419 | 5,57687E-05 |
| Ighv1-67   | Immunoglobulin heavy variable V1-67         | UP(D) | 1,353262 | 1,24812E-05 |
| Ighv1-19-1 | Immunoglobulin heavy variable 1-19-1        | UP(D) | 1,35123  | 2,85368E-05 |
| Ighv8-12   | Immunoglobulin heavy variable V8-12         | UP(D) | 1,346521 | 4,66171E-05 |
| Igkv4-71   | Immunoglobulin kappa chain variable 4-71    | UP(D) | 1,320406 | 0,000253842 |
| Ighg3      | Ig gamma-3 chain C region                   | UP(D) | 1,320073 | 0,001385028 |
| Igkv8-31   | Immunoglobulin kappa variable 8-31          | UP(D) | 1,318256 | 4,89248E-05 |
| Igkv8-16   | immunoglobulin kappa variable 8-16          | UP(D) | 1,315466 | 0,000793119 |
| Igkv4-53   | Immunoglobulin kappa variable 4-53          | UP(D) | 1,298448 | 0,000254865 |
| Igkv6-14   | Immunoglobulin kappa variable 6-14          | UP(D) | 1,29698  | 8,60564E-06 |
| Ighv1-42   | Immunoglobulin heavy variable V1-42         | UP(D) | 1,295163 | 0,000187251 |
| Ighv6-4    | Immunoglobulin heavy variable V6-4          | UP(D) | 1,294585 | 0,00022562  |
| Igkv4-60   | Immunoglobulin kappa variable 4-60          | UP(D) | 1,286708 | 3,88147E-05 |
| Igkv4-86   | Immunoglobulin kappa variable 4-86          | UP(D) | 1,276338 | 3,09341E-05 |
| Igkv4-70   | Immunoglobulin kappa chain variable 4-70    | UP(D) | 1,272792 | 0,001887071 |
| Ighv1-62-1 | Immunoglobulin heavy variable 1-62-1        | UP(D) | 1,259148 | 0,000556684 |
| Ighe       | Ig epsilon chain C region                   | UP(D) | 1,248241 | 7,7328E-05  |
| Igkv14-130 | Immunoglobulin kappa variable 14-130        | UP(D) | 1,248088 | 9,72305E-05 |
| Igkv2-112  | Immunoglobulin kappa variable 2-112         | UP(D) | 1,242291 | 0,000290523 |
| Iglv1      | Immunoglobulin lambda chain variable region | UP(D) | 1,242272 | 0,000258841 |
| Ighv1-79   | Immunoglobulin kappa variable 1-79          | UP(D) | 1,238163 | 3,03474E-05 |
| Igkv6-15   | Immunoglobulin kappa variable 6-15          | UP(D) | 1,236529 | 0,000435612 |
| Igkv4-91   | Immunoglobulin kappa chain variable 4-91    | UP(D) | 1,222303 | 0,000560744 |
| Igkv8-23-1 | immunoglobulin kappa variable 8-23-1        | UP(D) | 1,202952 | 0,000620013 |
| Ighv1-72   | Ig heavy chain V region 1-72                | UP(D) | 1,198094 | 9,28962E-06 |
| Igkv12-89  | Immunoglobulin kappa chain variable 12-89   | UP(D) | 1,187129 | 0,000274891 |
| Ighv1-62-2 | Immunoglobulin heavy variable 1-62-2        | UP(D) | 1,182234 | 2,64442E-05 |
| Igkv16-104 | Immunoglobulin kappa variable 16-104        | UP(D) | 1,182065 | 0,000133636 |
| Ighv4-2    | IgM heavy chain VDJ region                  | UP(D) | 1,179356 | 9,42265E-05 |
| Ighv9-1    | Immunoglobulin heavy variable 9-1           | UP(D) | 1,170058 | 0,000128823 |
| Igkv12-38  | Immunoglobulin kappa chain variable 12-38   | UP(D) | 1,164827 | 0,000325246 |
| Igkv4-73   | Immunoglobulin kappa variable 4-74          | UP(D) | 1,162281 | 4,36545E-05 |
| Igkv1-131  | Immunoglobulin kappa variable 1-131         | UP(D) | 1,155763 | 2,18869E-05 |
| Igkv1-135  | Immunoglobulin kappa variable 1-135         | UP(D) | 1,155126 | 0,000543733 |
| Igkv3-6    | Immunoglobulin kappa variable 3-6           | UP(D) | 1,152119 | 0,000145004 |
| Ighv5-12-4 | Immunoglobulin heavy variable 5-12-4        | UP(D) | 1,145454 | 0,000112351 |
| Igkv8-24   | Immunoglobulin kappa chain variable 8-24    | UP(D) | 1,139751 | 0,000158026 |
| Ighv8-6    | Immunoglobulin heavy variable V8-6          | UP(D) | 1,138856 | 9,67405E-05 |
| Igkv1-99   | Immunoglobulin kappa variable 1-99          | UP(D) | 1,133169 | 0,000183584 |
| Igkv12-98  | Immunoglobulin kappa variable 12-98         | UP(D) | 1,1315   | 0,00036701  |
| Ighg2c     | Immunoglobulin heavy constant gamma 2C      | UP(D) | 1,126418 | 3,326E-05   |

|                                     |                                                             |        |          |             |
|-------------------------------------|-------------------------------------------------------------|--------|----------|-------------|
| Igkv6-25                            | Immunoglobulin kappa chain variable 6-25                    | UP(D)  | 1,125962 | 1,70875E-05 |
| Igkv1-88                            | Immunoglobulin kappa chain variable 1-88                    | UP(D)  | 1,12578  | 0,000117409 |
| Igkv6-13                            | Immunoglobulin kappa variable 6-13                          | UP(D)  | 1,12541  | 0,000919361 |
| Ighv1-58                            | Immunoglobulin heavy variable 1-58                          | UP(D)  | 1,112912 | 0,007632438 |
| Igkv14-111                          | Immunoglobulin kappa variable 14-111                        | UP(D)  | 1,112462 | 0,000110122 |
| Igkv4-61                            | Immunoglobulin kappa chain variable 4-61                    | UP(D)  | 1,11134  | 4,24284E-05 |
| Jchain                              | Immunoglobulin J chain                                      | UP(D)  | 1,104429 | 8,09145E-05 |
| Igkv6-23                            | Immunoglobulin kappa variable 6-23                          | UP(D)  | 1,103654 | 5,39957E-05 |
| Ighv8-11                            | Immunoglobulin heavy variable V8-11                         | UP(D)  | 1,098955 | 0,000494422 |
| Igkv8-30                            | Immunoglobulin kappa chain variable 8-30                    | UP(D)  | 1,098602 | 2,46739E-05 |
| Igkv4-56                            | Immunoglobulin kappa variable 4-56                          | UP(D)  | 1,095479 | 0,000460964 |
| Ighv8-5                             | Immunoglobulin heavy variable V8-5                          | UP(D)  | 1,094603 | 1,32528E-05 |
| Igkv12-47                           | immunoglobulin kappa variable 12-47                         | UP(12) | 1,091345 | 0,003860936 |
| Ighv1-54                            | Immunoglobulin heavy variable V1-54                         | UP(D)  | 1,090311 | 1,52227E-05 |
| Ighg2b                              | Ig gamma-2B chain C region                                  | UP(D)  | 1,088386 | 4,8036E-05  |
| Igkv2-137                           | Immunoglobulin kappa chain variable 2-137                   | UP(D)  | 1,082944 | 0,000276367 |
| Iglj2                               | Immunoglobulin lambda joining 2                             | UP(8)  | 1,080354 | 0,000365055 |
| Ighv1-14                            | Immunoglobulin kappa variable 1-14                          | UP(D)  | 1,070701 | 0,003787653 |
| Ighv3-2                             | Immunoglobulin heavy variable 3-2                           | UP(D)  | 1,068828 | 0,015427685 |
| Ighg1                               | Ig gamma-1 chain C region secreted form                     | UP(D)  | 1,064601 | 0,000375409 |
| Igkj2                               | Immunoglobulin kappa joining 2                              | UP(12) | 1,053354 | 0,000334865 |
| Ighv8-4                             | immunoglobulin heavy variable V8-4                          | UP(D)  | 1,050004 | 0,000112387 |
| Ighj3                               | Immunoglobulin heavy joining 3                              | UP(12) | 1,049851 | 0,000203107 |
| Igkv4-69                            | Immunoglobulin kappa variable 4-69                          | UP(D)  | 1,041042 | 0,001085013 |
| Igkv4-51                            | Immunoglobulin kappa chain variable 4-51                    | UP(D)  | 1,031409 | 0,000479724 |
| Ighv3-1                             | Immunoglobulin heavy variable 3-1                           | UP(D)  | 1,028226 | 0,001072377 |
| Igkv9-129                           | Immunoglobulin kappa variable 9-129                         | UP(D)  | 1,019466 | 7,50375E-05 |
| Igkv2-109                           | Immunoglobulin kappa variable 2-109                         | UP(D)  | 1,017896 | 4,2895E-05  |
| Igkj4                               | Immunoglobulin kappa joining 4                              | UP(12) | 1,01743  | 0,000135141 |
| Ighv7-1                             | Immunoglobulin heavy variable 7-1                           | UP(12) | 1,003221 | 0,001403375 |
| <b>Regulation and tissue repair</b> |                                                             |        |          |             |
| Tyrobp                              | TYRO protein tyrosine kinase-binding protein                | UP(D)  | 2,364903 | 5,81443E-05 |
| Slamf7                              | SLAM family member 7                                        | UP(D)  | 2,225496 | 3,21326E-05 |
| Aoah                                | acyloxyacyl hydrolase [EC:3.1.1.77]                         | UP(D)  | 2,170462 | 1,28695E-05 |
| Fcer1g                              | high affinity immunoglobulin epsilon receptor subunit gamma | UP(D)  | 2,149737 | 0,000193335 |
| Fcgr2b                              | low affinity immunoglobulin gamma Fc receptor II-b          | UP(D)  | 2,132235 | 2,90635E-05 |
| Pdcd1                               | programmed cell death protein 1                             | UP(D)  | 2,073949 | 4,75262E-05 |
| Arg1                                | Arginase-1                                                  | UP(D)  | 2,059942 | 4,73352E-05 |
| Chl1                                | L1 cell adhesion molecule like protein                      | UP(D)  | 2,04095  | 1,41571E-05 |
| Cd200r2                             | cell surface glycoprotein CD200 receptor                    | UP(D)  | 1,917203 | 1,22629E-05 |
| Lair1                               | leukocyte-associated Ig-like receptor                       | UP(D)  | 1,909598 | 0,00012657  |
| Wfdc21                              | Protein Wfdc21                                              | UP(D)  | 1,861915 | 2,16746E-05 |
| Fcgr3                               | low affinity immunoglobulin gamma Fc receptor II-c          | UP(D)  | 1,841431 | 9,64472E-05 |
| Lilrb4a                             | leukocyte immunoglobulin-like receptor                      | UP(D)  | 1,83873  | 3,73375E-05 |
| Cd300lf                             | CO300B/D/F antigen                                          | UP(D)  | 1,831814 | 5,77154E-05 |
| Ass1                                | argininosuccinate synthase [EC:6.3.4.5]                     | UP(D)  | 1,798539 | 4,13462E-05 |



|                                |                                                                             |        |          |             |
|--------------------------------|-----------------------------------------------------------------------------|--------|----------|-------------|
| Cd200r1                        | cell surface glycoprotein CD200 receptor                                    | UP(D)  | 1,777666 | 8,96099E-05 |
| Trem2                          | triggering receptor expressed on myeloid cells 2                            | UP(D)  | 1,756511 | 6,88102E-05 |
| Mmp8                           | matrix metalloproteinase-8 (neutrophil collagenase)<br>[EC:3.4.24.34]       | UP(D)  | 1,716975 | 2,99437E-05 |
| Cd200r4                        | cell surface glycoprotein CD200 receptor                                    | UP(D)  | 1,706413 | 3,65722E-05 |
| Slamf8                         | SLAM family member 8                                                        | UP(D)  | 1,638288 | 3,24072E-05 |
| Fcgr4                          | low affinity immunoglobulin gamma Fc receptor III                           | UP(D)  | 1,597777 | 9,38255E-05 |
| Acod1                          | aconitate decarboxylase [EC:4.1.1.6]                                        | UP(D)  | 1,574847 | 3,6761E-05  |
| Mmp12                          | matrix metalloproteinase-12 (macrophage elastase)<br>[EC:3.4.24.65]         | UP(D)  | 1,548912 | 8,80359E-05 |
| Mmp13                          | Collagenase 3                                                               | UP(D)  | 1,522556 | 2,11587E-05 |
| Tnip3                          | TNFAIP3-interacting protein 3                                               | UP(D)  | 1,423849 | 7,86978E-05 |
| Mmp3                           | matrix metalloproteinase-3 (stromelysin 1, progelatinase)<br>[EC:3.4.24.17] | UP(D)  | 1,40916  | 0,000232178 |
| Ctla4                          | cytotoxic T-lymphocyte-associated protein 4                                 | UP(D)  | 1,368578 | 0,00016498  |
| Mmp10                          | matrix metalloproteinase-10 (stromelysin 2) [EC:3.4.24.22]                  | UP(D)  | 1,248864 | 0,00013263  |
| Il1rn                          | interleukin 1 receptor antagonist                                           | UP(D)  | 1,244346 | 0,000408599 |
| Slpi                           | antileukoproteinase                                                         | UP(D)  | 1,185214 | 0,000254756 |
| Col24a1                        | collagen type V/XI/XXIV/XXVII, alpha                                        | UP(D)  | 1,169066 | 2,24721E-05 |
| Reg3g                          | regenerating islet-derived 3 gamma                                          | UP(8)  | 1,167323 | 0,000307617 |
| Spsb4                          | SPRY domain-containing SOCS box protein 1/4                                 | UP(8)  | 1,162106 | 0,000143615 |
| Hmox1                          | heme oxygenase 1 [EC:1.14.14.18]                                            | UP(D)  | 1,12594  | 1,22926E-05 |
| A2m                            | alpha-2-macroglobulin                                                       | UP(D)  | 1,123508 | 9,21566E-05 |
| Fcrlb                          | NA                                                                          | UP(D)  | 1,121208 | 2,29193E-05 |
| Retnla                         | Resistin-like alpha                                                         | UP(D)  | 1,108239 | 0,005687287 |
| Ereg                           | epiregulin                                                                  | UP(D)  | 1,105559 | 0,000168334 |
| Btnl6                          | butyrophilin 6                                                              | UP(D)  | 1,093474 | 0,000874956 |
| Tigit                          | T-cell immunoreceptor with Ig and ITIM domains                              | UP(8)  | 1,070677 | 0,00023369  |
| Fgg                            | Fibrinogen gamma chain                                                      | UP(12) | 1,038051 | 0,000425448 |
| Ly6k                           | lymphocyte antigen 6 complex, locus K                                       | UP(12) | 1,032531 | 0,009785454 |
| Cd274                          | Programmed cell death 1 ligand 1                                            | UP(8)  | 1,030962 | 4,09815E-06 |
| Ly6i                           | Lymphocyte antigen 6I                                                       | UP(12) | 1,009717 | 5,99584E-05 |
| Pdcd1lg2                       | Programmed cell death 1 ligand 2                                            | UP(8)  | 1,009324 | 3,02313E-05 |
| Smpdl3b                        | Acid sphingomyelinase-like phosphodiesterase 3b                             | UP(8)  | 1,007903 | 1,46933E-05 |
| Fcgr1                          | High affinity immunoglobulin gamma Fc receptor I                            | UP(8)  | 1,004063 | 2,14204E-05 |
| <b>Gene/protein regulation</b> |                                                                             |        |          |             |
| Derl3                          | Derlin-2/3                                                                  | UP(D)  | 2,25272  | 1,31629E-05 |
| Ovol3                          | Putative transcription factor ovo-like protein 3                            | UP(D)  | 2,234413 | 1,60519E-05 |
| Npl                            | Nuclear protein localization protein 4 homolog                              | UP(D)  | 2,165087 | 0,000541129 |
| Ubd                            | ubiquitin D                                                                 | UP(D)  | 2,155088 | 2,79661E-05 |
| Fut1                           | galactoside 2-L-fucosyltransferase 1/2 [EC:2.4.1.69]                        | UP(D)  | 2,143103 | 1,51975E-05 |
| Serpina3f                      | Serine protease inhibitor A3F                                               | UP(D)  | 2,06118  | 7,26077E-05 |
| Rnf149                         | E3 ubiquitin-protein ligase RNF149 [EC:2.3.2.27]                            | UP(D)  | 2,032577 | 1,24636E-05 |
| Rnf128                         | E3 ubiquitin-protein ligase RNF128 [EC:2.3.2.27]                            | UP(D)  | 1,983871 | 0,000121657 |
| Sdf2l1                         | Stromal cell-derived factor 2-like protein 1                                | UP(D)  | 1,969222 | 0,000168545 |
| Timp1                          | metalloproteinase inhibitor 1                                               | UP(D)  | 1,953594 | 1,26771E-05 |
| P4ha3                          | prolyl 4-hydroxylase [EC:1.14.11.2]                                         | UP(D)  | 1,878234 | 3,17217E-05 |

|                                    |                                                                                             |        |          |             |
|------------------------------------|---------------------------------------------------------------------------------------------|--------|----------|-------------|
| Ear6                               | Ear6 protein                                                                                | UP(D)  | 1,842501 | 1,2687E-05  |
| Cstb                               | cystatin-A/B                                                                                | UP(D)  | 1,830246 | 1,44391E-05 |
| Cstdc4                             | Cystatin domain-containing 4                                                                | UP(D)  | 1,791522 | 2,80586E-05 |
| Serpina3g                          | Serine protease inhibitor A3G                                                               | UP(D)  | 1,695611 | 0,001231103 |
| Serpina3i                          | Serine (or cysteine) peptidase inhibitor, clade A, member 3I                                | UP(D)  | 1,521036 | 0,000322051 |
| Ctss                               | cathepsin S [EC:3.4.22.27]                                                                  | UP(D)  | 1,520351 | 3,51307E-05 |
| Spic                               | transcription factor Spi-C                                                                  | UP(D)  | 1,402411 | 3,84526E-05 |
| Stfa2l1                            | stefin A2 like 1                                                                            | UP(D)  | 1,390768 | 0,000282332 |
| Rnase2a                            | Ribonuclease, RNase A family, 2A (liver, eosinophil-derived neurotoxin)                     | UP(8)  | 1,279519 | 0,006481001 |
| Tfec                               | transcription factor EC                                                                     | UP(D)  | 1,269696 | 3,74224E-05 |
| Wfdc17                             | Activated macrophage/microglia WAP domain protein                                           | UP(D)  | 1,26686  | 0,000203263 |
| Stfa2                              | cystatin-A/B                                                                                | UP(D)  | 1,205505 | 4,08492E-05 |
| B230303A05Rik                      | U1 small nuclear ribonucleoprotein 1C pseudogene                                            | UP(D)  | 1,184436 | 2,16408E-05 |
| Aicda                              | Single-stranded DNA cytosine deaminase                                                      | UP(D)  | 1,112878 | 0,00019665  |
| Csta2                              | cystatin-A/B                                                                                | UP(D)  | 1,088477 | 0,000269932 |
| Cpa6                               | Carboxypeptidase A6                                                                         | UP(8)  | 1,08247  | 0,008522467 |
| Serpina3h                          | Serine protease inhibitor A3H                                                               | UP(D)  | 1,082125 | 0,000452751 |
| Ctsk                               | cathepsin K [EC:3.4.22.38]                                                                  | UP(D)  | 1,064556 | 3,06389E-05 |
| Eaf2                               | ELL-associated factor 2                                                                     | UP(12) | 1,059271 | 6,37398E-05 |
| B3galt5                            | beta-1,3-galactosyltransferase 5 [EC:2.4.1.-]                                               | UP(D)  | 1,038163 | 0,02047854  |
| Arnt2                              |                                                                                             | UP(8)  | 1,037611 | 0,00031628  |
| Basp1                              | Brain acid soluble protein 1                                                                | UP(8)  | 1,036079 | 3,40934E-07 |
| Gfi1                               | Growth factor independent protein 1                                                         | UP(D)  | 1,034997 | 0,00013217  |
| Cpxm1                              | Probable carboxypeptidase X1                                                                | UP(8)  | 1,03199  | 6,67821E-06 |
| Ctsl                               | Procathepsin L                                                                              | UP(8)  | 1,011147 | 0,000106147 |
| Fcor                               | Foxo1-corepressor                                                                           | UP(8)  | 1,004627 | 4,09815E-06 |
| <b>Energy and lipid metabolism</b> |                                                                                             |        |          |             |
| Pla2g7                             | platelet-activating factor acetylhydrolase [EC:3.1.1.47]                                    | UP(D)  | 2,167659 | 0,000342664 |
| Hk3                                | hexokinase [EC:2.7.1.1]                                                                     | UP(D)  | 1,75556  | 3,40112E-05 |
| Gla                                | Growth factor independent protein 1                                                         | UP(D)  | 1,303367 | 0,001139193 |
| Pla1a                              | phosphatidylserine sn-1 acylhydrolase [EC:3.1.1.111]                                        | UP(D)  | 1,285157 | 1,12799E-05 |
| Olr1                               | oxidised low-density lipoprotein receptor 1                                                 | UP(8)  | 1,201657 | 1,92057E-06 |
| Lpcat2                             | lysophosphatidylcholine acyltransferase / lyso-PAF acetyltransferase [EC:2.3.1.23 2.3.1.67] | UP(D)  | 1,182206 | 0,000256472 |
| Msr1                               | macrophage scavenger receptor 1                                                             | UP(D)  | 1,129434 | 5,68353E-05 |
| Cyp7b1                             | Cytochrome P450 7B1                                                                         | UP(12) | 1,000947 | 1,8032E-05  |
| <b>Cell cycle</b>                  |                                                                                             |        |          |             |
| Zbp1                               | Z-DNA-binding protein 1                                                                     | UP(D)  | 2,095708 | 1,45709E-05 |
| Bcl2a1d                            | hematopoietic Bcl-2-related protein A1                                                      | UP(D)  | 1,946559 | 1,98711E-05 |
| Inhba                              | inhibin beta A chain                                                                        | UP(D)  | 1,914957 | 3,05306E-05 |
| Bcl2a1c                            | hematopoietic Bcl-2-related protein A1                                                      | UP(D)  | 1,878795 | 2,2889E-05  |
| Mefv                               | pyrin                                                                                       | UP(D)  | 1,869159 | 7,69807E-05 |
| Arl11                              | ADP-ribosylation factor-like protein 11                                                     | UP(D)  | 1,822941 | 5,14453E-05 |
| Bcl2a1a                            | hematopoietic Bcl-2-related protein A1                                                      | UP(D)  | 1,806497 | 1,60123E-05 |
| Gpnmb                              | transmembrane glycoprotein NMB                                                              | UP(D)  | 1,788346 | 7,79915E-06 |
| Serpinb2                           | plasminogen activator inhibitor 2                                                           | UP(D)  | 1,743963 | 2,55263E-05 |

|                            |                                                                                     |        |          |             |
|----------------------------|-------------------------------------------------------------------------------------|--------|----------|-------------|
| Bcl2a1b                    | hematopoietic Bcl-2-related protein A1                                              | UP(D)  | 1,722721 | 0,000300459 |
| Spdl1                      | Spindle apparatus coiled-coil domain-containing protein 1                           | UP(D)  | 1,385308 | 0,000681824 |
| Gas2l3                     | growth arrest-specific 2 like 3                                                     | UP(8)  | 1,021524 | 3,40934E-07 |
| <b>Iron retention</b>      |                                                                                     |        |          |             |
| Lcn2                       | lipocalin 2                                                                         | UP(D)  | 1,294766 | 0,000262707 |
| <b>Coagulation</b>         |                                                                                     |        |          |             |
| Procr                      | protein C receptor, endothelial (EPCR)                                              | UP(D)  | 1,763864 | 0,000780925 |
| Kng1                       | Kininogen-1                                                                         | UP(D)  | 1,657824 | 0,000132478 |
| Serpina10                  | serpin A                                                                            | UP(D)  | 1,509817 | 0,000302798 |
| Tfpi2                      | tissue factor pathway inhibitor 2                                                   | UP(8)  | 1,238266 | 0,000163469 |
| F10                        | coagulation factor X [EC:3.4.21.6]                                                  | UP(D)  | 1,139223 | 0,011061204 |
| F9                         | Coagulation factor IX                                                               | UP(D)  | 1,039342 | 0,000189797 |
| Kng2                       | Kininogen 2                                                                         | UP(8)  | 1,029456 | 0,000438362 |
| <b>Organogenesis</b>       |                                                                                     |        |          |             |
| Grem1                      | Gremlin-1                                                                           | UP(D)  | 2,066399 | 0,000393424 |
| Acp5                       | Tartrate-resistant acid phosphatase type 5                                          | UP(8)  | 1,002048 | 1,92057E-06 |
| <b>Transport</b>           |                                                                                     |        |          |             |
| Calhm6                     | calcium homeostasis modulator family member 6                                       | UP(D)  | 2,47254  | 0,000138133 |
| Slc11a1                    | Natural resistance-associated macrophage protein 1                                  | UP(D)  | 1,945349 | 6,48599E-05 |
| Clca3b                     | calcium-activated chloride channel regulator 3/4                                    | UP(D)  | 1,752304 | 8,53964E-05 |
| Slc6a12                    | solute carrier family 6 (neurotransmitter transporter, betaine/GABA) member 12      | UP(D)  | 1,67971  | 0,00066572  |
| Slc7a2                     | solute carrier family 7 (cationic amino acid transporter), member 2                 | UP(D)  | 1,514576 | 0,000478625 |
| Atp6v0d2                   | V-type H <sup>+</sup> -transporting ATPase subunit d                                | UP(D)  | 1,417533 | 3,35248E-05 |
| Slc26a4                    | solute carrier family 26 (sodium-independent chloride/iodide transporter), member 4 | UP(D)  | 1,328667 | 0,000965582 |
| Stra6l                     | Stimulated by retinoic acid gene 6 protein-like                                     | UP(D)  | 1,261297 | 0,000458754 |
| Slc7a11                    | solute carrier family 7 (L-type amino acid transporter), member 11                  | UP(D)  | 1,252177 | 0,004853068 |
| Orm1                       | Alpha-1-acid glycoprotein                                                           | UP(D)  | 1,214203 | 9,4431E-05  |
| Fabp5                      | fatty acid-binding protein 5, epidermal                                             | UP(8)  | 1,126686 | 0,000389619 |
| Fabp7                      | fatty acid-binding protein 7, brain                                                 | UP(D)  | 1,11511  | 8,64264E-05 |
| Orm2                       | Alpha-1-acid glycoprotein 2                                                         | UP(12) | 1,026997 | 0,000944036 |
| Clca3a2                    | chloride channel accessory 3A2                                                      | UP(8)  | 1,025085 | 1,35473E-06 |
| Tmc5                       | Transmembrane channel-like protein 5                                                | UP(8)  | 1,013459 | 0,000736957 |
| <b>Signal transduction</b> |                                                                                     |        |          |             |
| Fpr3                       | formyl peptide receptor-like                                                        | UP(D)  | 1,939812 | 4,39963E-05 |
| Gpr84                      | G protein-coupled receptor 84                                                       | UP(D)  | 1,376085 | 0,000444582 |
| Gpr176                     | G protein-coupled receptor 176                                                      | UP(D)  | 1,057485 | 4,25885E-05 |
| B430306N03Rik              | RIKEN cDNA B430306N03 gene                                                          | UP(D)  | 1,045158 | 0,00029486  |
| Hcar2                      | Hydroxycarboxylic acid receptor 2                                                   | UP(8)  | 1,009821 | 3,09485E-05 |
| <b>Others</b>              |                                                                                     |        |          |             |
| Olf1r111                   | olfactory receptor                                                                  | UP(D)  | 2,361714 | 6,0023E-05  |
| Fst                        | Follistatin                                                                         | UP(D)  | 2,137075 | 2,99182E-05 |
| Gm4841                     | IRG-type G domain-containing protein                                                | UP(D)  | 2,012881 | 6,08222E-05 |
| Snord23                    |                                                                                     | UP(D)  | 1,982959 | 1,1588E-05  |

|                            |                                                                                 |        |          |             |
|----------------------------|---------------------------------------------------------------------------------|--------|----------|-------------|
| Glipr1                     | glioma pathogenesis-related protein 1                                           | UP(D)  | 1,951526 | 8,57867E-05 |
| Acpp                       | Prostatic acid phosphatase                                                      | UP(D)  | 1,923057 | 3,04455E-05 |
| Gpr55                      | G protein-coupled receptor 55                                                   | UP(D)  | 1,897331 | 1,80251E-05 |
| Stac2                      | SH3 and cysteine-rich domain-containing protein 2                               | UP(D)  | 1,809912 | 4,17147E-05 |
| Gm26317                    | NA                                                                              | UP(D)  | 1,748444 | 6,47113E-05 |
| Olf110                     | olfactory receptor                                                              | UP(D)  | 1,697922 | 8,52677E-05 |
| Mir155hg                   | NA                                                                              | UP(D)  | 1,584538 | 0,000123754 |
| Gm4951                     | Interferon-gamma-inducible GTPase Ifgga2 protein                                | UP(D)  | 1,423841 | 0,000283024 |
| Guca1a                     | guanylate cyclase activator 1                                                   | UP(D)  | 1,387229 | 0,000104839 |
| Sfn4                       | Schlafen4                                                                       | UP(D)  | 1,364935 | 0,00203079  |
| Adamts16                   | a disintegrin and metalloproteinase with thrombospondin motifs 16 [EC:3.4.24.-] | UP(8)  | 1,274171 | 0,000250165 |
| Ptafr                      | platelet-activating factor receptor                                             | UP(D)  | 1,267027 | 3,22525E-05 |
| Snord35a                   | NA                                                                              | UP(8)  | 1,205115 | 0,003104284 |
| AW112010                   | NA                                                                              | UP(D)  | 1,14618  | 3,28245E-05 |
| Gm25097                    | NA                                                                              | UP(D)  | 1,086533 | 3,50016E-05 |
| Nts                        | Neurotensin/neuromedin N                                                        | UP(8)  | 1,082151 | 3,88505E-05 |
| Adamts4                    | A disintegrin and metalloproteinase with thrombospondin motifs 4                | UP(8)  | 1,069408 | 4,40162E-05 |
| Mt2                        | Metallothionein-2                                                               | UP(12) | 1,051526 | 0,003152007 |
| Lhfpl2                     | LHFPL tetraspan subfamily member protein                                        | UP(D)  | 1,051134 | 0,001832487 |
| Capg                       | Actin regulatory protein CAP-G                                                  | UP(8)  | 1,035002 | 2,84631E-06 |
| Marcks1                    | MARCKS-related protein                                                          | UP(8)  | 1,030052 | 7,64541E-07 |
| Ch25h                      |                                                                                 | UP(8)  | 1,016673 | 4,66372E-06 |
| <b>No annotation found</b> |                                                                                 |        |          |             |
| Gm12250                    | NA                                                                              | UP(D)  | 2,123809 | 1,08301E-05 |
| Speer4e                    | NA                                                                              | UP(D)  | 1,863469 | 1,60407E-05 |
| Gm5424                     | NA                                                                              | UP(D)  | 1,75971  | 7,67412E-05 |
| Creg2                      | protein CREG                                                                    | UP(D)  | 1,266881 | 0,000306081 |
| Ankrd55                    | Ankyrin repeat domain-containing protein 55                                     | UP(D)  | 1,247566 | 3,89478E-05 |
| Gm24535                    | predicted gene, 24535                                                           | UP(8)  | 1,17265  | 0,004120279 |
| Tmem202                    | NA                                                                              | UP(8)  | 1,128053 | 7,96434E-05 |
| Lilr4b                     | leukocyte immunoglobulin-like receptor, subfamily B, member 4B                  | UP(D)  | 1,124924 | 0,001408036 |
| Ceacam19                   | carcinoembryonic antigen-related cell adhesion molecule 19                      | UP(D)  | 1,113009 | 0,000528596 |
| Gm22580                    | predicted gene, 22580                                                           | UP(D)  | 1,088951 | 6,05855E-05 |
| 4930430E12Rik              | NA                                                                              | UP(8)  | 1,071137 | 1,18712E-05 |
| Ppp1r14bl                  | Protein phosphatase 1, regulatory inhibitor subunit 14B-like                    | UP(8)  | 1,070265 | 6,09209E-05 |
| Gm21149                    | predicted gene, 21149                                                           | UP(8)  | 1,05712  | 2,23056E-05 |
| Gm31160                    | mucin-12                                                                        | UP(D)  | 1,039695 | 4,08935E-05 |
| Ms4a14                     | Membrane-spanning 4-domains, subfamily A, member 14                             | UP(8)  | 1,037517 | 4,87018E-06 |
| 4930572O03Rik              | NA                                                                              | UP(D)  | 1,030066 | 0,000610495 |
| 4933430I17Rik              |                                                                                 | UP(8)  | 1,015123 | 5,44707E-06 |
| Ms4a4a                     | Membrane-spanning 4-domains subfamily A member 3                                | UP(8)  | 1,011756 | 0,000824244 |
| Gm21190                    | predicted gene, 21190                                                           | UP(8)  | 1,00553  | 9,44382E-05 |
