# Supplementary material for: Transcriptional profiling of a fungal granuloma reveals a low metabolic activity of Paracoccidioides brasiliensis yeasts and an actively regulated host immune response
Source: PubMed Central journal article supplement (PMC10585178; doi:10.3389/fcimb.2023.1268959), 2023-10-05
Supplement: Table_3.pdf [file Table_3.pdf]

**Supplementary Table 3. Downregulated mice genes.**

| Accession number                           | Protein                                                       | Expression status | Log (Fold Change) | Adjusted p-value |
|--------------------------------------------|---------------------------------------------------------------|-------------------|-------------------|------------------|
| <b>Muscle contraction and organization</b> |                                                               |                   |                   |                  |
| Sln                                        | sarcolipin                                                    | DOWN(D)           | -2,15699          | 0,001587         |
| Myh8                                       | myosin heavy chain 1/2/3/4/8/13/7B/15                         | DOWN(8)           | -1,80004          | 0,000855         |
| Myh1                                       | myosin heavy chain 1/2/3/4/8/13/7B/15                         | DOWN(8)           | -1,77174          | 0,001517         |
| Tnnc1                                      | troponin C, slow skeletal and cardiac muscles                 | DOWN(D)           | -1,77016          | 0,000138         |
| Myh4                                       | Myosin-4                                                      | DOWN(8)           | -1,7189           | 0,002297         |
| Xirp2                                      | xin actin-binding repeat containing 2                         | DOWN(8)           | -1,65061          | 0,002191         |
| Myh13                                      | myosin heavy chain 1/2/3/4/8/13/7B/15                         | DOWN(8)           | -1,61232          | 0,00143          |
| Csrp3                                      | cysteine and glycine-rich protein                             | DOWN(D)           | -1,52498          | 0,002522         |
| Tnnt2                                      | troponin T, cardiac muscle                                    | DOWN(D)           | -1,45826          | 0,011979         |
| Myl7                                       | myosin regulatory light chain 7                               | DOWN(D)           | -1,4156           | 0,001571         |
| Smpx                                       | Small muscular protein                                        | DOWN(8)           | -1,39498          | 0,002656         |
| Trdn                                       | triadin                                                       | DOWN(8)           | -1,38785          | 0,003233         |
| Retn                                       | resistin                                                      | DOWN(D)           | -1,37561          | 0,003771         |
| Ttn                                        | titin [EC:2.7.11.1]                                           | DOWN(8)           | -1,36393          | 0,000316         |
| Lmod2                                      | leiomodin                                                     | DOWN(8)           | -1,33695          | 0,003945         |
| Mylk3                                      | myosin-light-chain kinase [EC:2.7.11.18]                      | DOWN(D)           | -1,33469          | 0,001185         |
| Myoz2                                      | myozenin 2                                                    | DOWN(D)           | -1,32969          | 0,005108         |
| Myom2                                      | myomesin                                                      | DOWN(8)           | -1,31504          | 0,002159         |
| Xirp1                                      | xin actin-binding repeat containing 1                         | DOWN(D)           | -1,29326          | 0,002107         |
| Fndc5                                      | fibronectin type III domain-containing protein 4/5            | DOWN(D)           | -1,26338          | 0,0012           |
| Tbx20                                      | T-box protein 20                                              | DOWN(D)           | -1,25822          | 0,001607         |
| Mylk4                                      | Myosin light chain kinase family member 4                     | DOWN(8)           | -1,2387           | 0,00432          |
| Cmya5                                      | cardiomyopathy-associated protein 5                           | DOWN(8)           | -1,23691          | 0,000695         |
| Mybpc3                                     | myosin-binding protein C, cardiac-type                        | DOWN(D)           | -1,22767          | 0,007734         |
| Tnni3                                      | troponin I, cardiac muscle                                    | DOWN(D)           | -1,22069          | 0,003786         |
| Kcng2                                      | potassium voltage-gated channel subfamily G member 2          | DOWN(D)           | -1,2144           | 0,004898         |
| Obscn                                      | obscurin-RhoGEF [EC:2.7.11.1]                                 | DOWN(D)           | -1,19734          | 0,003321         |
| Myh3                                       | Myosin-3                                                      | DOWN(8)           | -1,18001          | 0,007459         |
| Myh6                                       | myosin heavy chain 6/7                                        | DOWN(D)           | -1,17542          | 0,000529         |
| Mybphl                                     | myosin-binding protein H                                      | DOWN(D)           | -1,17353          | 0,008096         |
| Synpo2l                                    | Synaptopodin 2-like protein                                   | DOWN(D)           | -1,16931          | 0,008231         |
| Ryr2                                       | ryanodine receptor 2                                          | DOWN(D)           | -1,16664          | 0,000979         |
| Kcnj5                                      | potassium inwardly-rectifying channel subfamily J member 5    | DOWN(D)           | -1,16526          | 0,00749          |
| Pln                                        | Phospholamban                                                 | DOWN(D)           | -1,16348          | 0,005872         |
| Alpk3                                      | alpha-kinase                                                  | DOWN(D)           | -1,14371          | 0,002334         |
| Casq2                                      | calsequestrin 2                                               | DOWN(D)           | -1,14245          | 0,005635         |
| Ldb3                                       | PDZ and LIM domain protein 5/6/7                              | DOWN(D)           | -1,14008          | 0,001257         |
| Myh7                                       | myosin heavy chain 6/7                                        | DOWN(D)           | -1,13854          | 0,004939         |
| Hrc                                        | sarcoplasmic reticulum histidine-rich calcium-binding protein | DOWN(D)           | -1,13631          | 0,003143         |
| Myl1                                       | Myosin light chain 1/3, skeletal muscle isoform               | DOWN(8)           | -1,12704          | 0,006081         |
| Trim55                                     | Tripartite motif-containing 55                                | DOWN(12)          | -1,12272          | 0,008765         |
| Coro6                                      | coronin-1B/1C/6                                               | DOWN(12)          | -1,11778          | 0,001661         |

|                       |                                                                                                                                 |          |          |          |
|-----------------------|---------------------------------------------------------------------------------------------------------------------------------|----------|----------|----------|
| Myo7b                 | Unconventional myosin-VIIb                                                                                                      | DOWN(8)  | -1,0907  | 0,000183 |
| Tcap                  | Telethonin                                                                                                                      | DOWN(8)  | -1,0795  | 0,008244 |
| Myo18b                | Myo18b protein                                                                                                                  | DOWN(8)  | -1,07525 | 0,002078 |
| Synm                  | Synemin                                                                                                                         | DOWN(8)  | -1,05866 | 0,000487 |
| Smyd1                 | [histone H3]-lysine4/36 N-trimethyltransferase SMYD<br>[EC:2.1.1.354 2.1.1.357]                                                 | DOWN(D)  | -1,05077 | 0,000733 |
| Srl                   | sarcalumenin                                                                                                                    | DOWN(D)  | -1,02872 | 0,002283 |
| Actn2                 | Alpha-actinin-2                                                                                                                 | DOWN(12) | -1,02565 | 0,012348 |
| Popdc2                | Popeye domain-containing protein 2                                                                                              | DOWN(12) | -1,00174 | 0,001606 |
| <b>Nervous system</b> |                                                                                                                                 |          |          |          |
| Scn3a                 | voltage-gated sodium channel type III alpha                                                                                     | DOWN(D)  | -1,47153 | 0,004764 |
| Kcna1                 | potassium voltage-gated channel Shaker-related subfamily A<br>member 1                                                          | DOWN(D)  | -1,43254 | 0,005246 |
| Gria1                 | glutamate receptor 1                                                                                                            | DOWN(D)  | -1,38642 | 0,002846 |
| Lrtm1                 | leucine-rich repeats and transmembrane domains 1                                                                                | DOWN(D)  | -1,33558 | 0,004851 |
| Slc17a7               | MFS transporter, ACS family, solute carrier family 17 (sodium-<br>dependent inorganic phosphate cotransporter), member<br>6/7/8 | DOWN(8)  | -1,32168 | 0,000511 |
| Kcnh2                 | potassium voltage-gated channel Eag-related subfamily H<br>member 2                                                             | DOWN(D)  | -1,3173  | 0,013463 |
| Ckmt2                 | creatine kinase [EC:2.7.3.2]                                                                                                    | DOWN(D)  | -1,26754 | 0,010927 |
| Shank3                | SH3 and multiple ankyrin repeat domains protein                                                                                 | DOWN(D)  | -1,25195 | 0,005262 |
| Bcan                  | brevican                                                                                                                        | DOWN(12) | -1,21116 | 0,001381 |
| Scn1a                 | voltage-gated sodium channel type I alpha                                                                                       | DOWN(8)  | -1,16132 | 0,004522 |
| Kcnj12                | potassium inwardly-rectifying channel subfamily J member<br>12/18                                                               | DOWN(8)  | -1,1479  | 0,001293 |
| Nptx1                 | neuronal pentraxin 1                                                                                                            | DOWN(12) | -1,1369  | 0,000261 |
| Slc7a10               | solute carrier family 7 (D/L-type amino acid transporter),<br>member 10                                                         | DOWN(D)  | -1,13547 | 0,00345  |
| Mapt                  | microtubule-associated protein tau                                                                                              | DOWN(D)  | -1,10244 | 0,001421 |
| Rgs6                  | regulator of G-protein signaling                                                                                                | DOWN(D)  | -1,08417 | 0,000508 |
| Colq                  | Acetylcholinesterase collagenic tail peptide                                                                                    | DOWN(12) | -1,07291 | 0,000504 |
| Prx                   | Periaxin                                                                                                                        | DOWN(8)  | -1,06468 | 0,001385 |
| Kcna2                 | Potassium voltage-gated channel subfamily A member 2                                                                            | DOWN(D)  | -1,05175 | 0,000648 |
| Dpysl5                | dihydropyrimidinase-like 5                                                                                                      | DOWN(D)  | -1,04199 | 0,00076  |
| Scn5a                 | Sodium channel protein type 5 subunit alpha                                                                                     | DOWN(12) | -1,0341  | 0,002499 |
| Scn2a                 | Sodium channel protein type 2 subunit alpha                                                                                     | DOWN(12) | -1,01968 | 0,014568 |
| <b>Organogenesis</b>  |                                                                                                                                 |          |          |          |
| Aard                  | alanine and arginine rich domain containing protein                                                                             | DOWN(D)  | -1,47845 | 0,009029 |
| Tnxb                  | tenascin                                                                                                                        | DOWN(D)  | -1,43596 | 0,006338 |
| Bmp6                  | bone morphogenetic protein 6                                                                                                    | DOWN(D)  | -1,4241  | 0,008604 |
| Gata4                 | GATA-binding protein 4                                                                                                          | DOWN(D)  | -1,36945 | 0,00133  |
| Hjv                   | hemojuvelin                                                                                                                     | DOWN(12) | -1,24769 | 0,019055 |
| Aplnr                 | apelin receptor                                                                                                                 | DOWN(12) | -1,22146 | 0,009693 |
| Sox11                 | transcription factor SOX11/12 (SOX group C)                                                                                     | DOWN(D)  | -1,13558 | 0,002878 |
| Adra1b                | adrenergic receptor alpha-1B                                                                                                    | DOWN(12) | -1,10776 | 0,000901 |
| Rbp4                  | retinol-binding protein 4                                                                                                       | DOWN(12) | -1,09793 | 0,004239 |
| Col13a1               | Collagen alpha-1(XIII) chain                                                                                                    | DOWN(D)  | -1,07994 | 0,003297 |

|                                                      |                                                              |          |          |          |
|------------------------------------------------------|--------------------------------------------------------------|----------|----------|----------|
| Lrrc17                                               |                                                              | DOWN(12) | -1,02049 | 0,01788  |
| Hhatl                                                | Hedgehog acyltransferase-like protein                        | DOWN(8)  | -1,01487 | 0,001763 |
| <b>Lipid metabolism</b>                              |                                                              |          |          |          |
| Acacb                                                | Acetyl-CoA carboxylase 2                                     | DOWN(D)  | -1,74821 | 0,020854 |
| Cyp4a31                                              | long-chain fatty acid omega-monooxygenase [EC:1.14.14.80]    | DOWN(D)  | -1,24077 | 0,004107 |
| Cyp1a1                                               | cytochrome P450 family 1 subfamily A1 [EC:1.14.14.1]         | DOWN(D)  | -1,23017 | 0,001407 |
| Cyp2e1                                               | cytochrome P450 family 2 subfamily E1 [EC:1.14.14.-]         | DOWN(D)  | -1,21999 | 0,003685 |
| Plin4                                                | perilipin-4                                                  | DOWN(D)  | -1,19548 | 0,001265 |
| Thrsp                                                | thyroid hormone responsive                                   | DOWN(D)  | -1,14802 | 0,001858 |
| Cyp4a10                                              | Cytochrome P450 4A10                                         | DOWN(8)  | -1,14637 | 0,002356 |
| Plin1                                                | perilipin-1                                                  | DOWN(D)  | -1,13331 | 0,00144  |
| Cyp4a32                                              | Cytochrome P450, family 4, subfamily a, polypeptide 32       | DOWN(8)  | -1,11972 | 0,003217 |
| Tecrl                                                | trans-2,3-enoyl-CoA reductase-like [EC:1.3.1.-]              | DOWN(D)  | -1,07444 | 0,000485 |
| Acox1                                                | acyl-Coenzyme A oxidase-like                                 | DOWN(D)  | -1,05588 | 0,00309  |
| <b>Energy metabolism</b>                             |                                                              |          |          |          |
| Cox8b                                                | cytochrome c oxidase subunit 8                               | DOWN(D)  | -1,3867  | 0,004553 |
| Cox6a2                                               | Cytochrome c oxidase subunit 6A2, mitochondrial              | DOWN(D)  | -1,22813 | 0,006289 |
| Pck1                                                 | phosphoenolpyruvate carboxykinase (GTP) [EC:4.1.1.32]        | DOWN(D)  | -1,1931  | 0,000458 |
| Glb1l3                                               | galactosidase, beta 1 like 3                                 | DOWN(8)  | -1,16418 | 0,000181 |
| Cox7a1                                               | cytochrome c oxidase subunit 7a                              | DOWN(12) | -1,12561 | 0,008107 |
| Pdk4                                                 | Pyruvate dehydrogenase kinase, isoenzyme 4                   | DOWN(8)  | -1,02608 | 0,001765 |
| <b>Pro-inflammatory</b>                              |                                                              |          |          |          |
| Bpifa1                                               | BPI fold-containing family A                                 | DOWN(D)  | -1,23836 | 0,00444  |
| Cyp2f2                                               | cytochrome P450 family 2 subfamily F [EC:1.14.14.1]          | DOWN(D)  | -1,17127 | 0,006241 |
| Aoc3                                                 | primary-amine oxidase [EC:1.4.3.21]                          | DOWN(12) | -1,09154 | 0,001974 |
| Spon2                                                | Spondin-2                                                    | DOWN(12) | -1,05775 | 0,023491 |
| Tril                                                 | TLR4 interactor with leucine-rich repeats                    | DOWN(D)  | -1,05367 | 0,000741 |
| Cfd                                                  | complement factor D [EC:3.4.21.46]                           | DOWN(D)  | -1,04996 | 0,001562 |
| <b>Iron retention</b>                                |                                                              |          |          |          |
| Hamp                                                 | hepcidin                                                     | DOWN(D)  | -1,50399 | 0,002563 |
| <b>Cell adhesion, activation and differentiation</b> |                                                              |          |          |          |
| Lmntd1                                               | lamin tail domain containing 1                               | DOWN(D)  | -1,89557 | 0,003664 |
| Fgf12                                                | Fibroblast growth factor 12                                  | DOWN(D)  | -1,21961 | 0,007567 |
| Fgfr4                                                | fibroblast growth factor receptor 4 [EC:2.7.10.1]            | DOWN(D)  | -1,08753 | 0,005028 |
| Nrxn2                                                | Neurexin-2                                                   | DOWN(8)  | -1,04558 | 0,000144 |
| Pcdhac2                                              | protocadherin alpha                                          | DOWN(D)  | -1,04251 | 0,009676 |
| Ctnna3                                               | Catenin alpha-3                                              | DOWN(D)  | -1,03931 | 0,005232 |
| Pcdh1                                                | Protocadherin 1                                              | DOWN(8)  | -1,02909 | 0,000143 |
| Rtkn2                                                | Rhotekin-2                                                   | DOWN(8)  | -1,01313 | 0,000268 |
| Megf6                                                | Multiple epidermal growth factor-like domains protein 6      | DOWN(8)  | -1,0064  | 9,25E-05 |
| <b>Regulation and tissue repair</b>                  |                                                              |          |          |          |
| Adipoq                                               | adiponectin                                                  | DOWN(D)  | -1,18296 | 0,003149 |
| Bves                                                 | Blood vessel epicardial substance                            | DOWN(8)  | -1,13558 | 0,000806 |
| Ltbp4                                                | latent transforming growth factor beta binding protein 2/3/4 | DOWN(D)  | -1,12502 | 0,004277 |
| Gpr17                                                | Uracil nucleotide/cysteinyl leukotriene receptor             | DOWN(D)  | -1,11834 | 0,000416 |
| Smad6                                                | SMAD family member 6                                         | DOWN(8)  | -1,032   | 7,8E-05  |

|                                   |                                                                                                 |          |          |          |
|-----------------------------------|-------------------------------------------------------------------------------------------------|----------|----------|----------|
| Pcolce2                           | procollagen C-endopeptidase enhancer                                                            | DOWN(D)  | -1,02778 | 0,006885 |
| Colgalt2                          | collagen beta-1,O-galactosyltransferase [EC:2.4.1.50]                                           | DOWN(D)  | -1,02311 | 0,000835 |
| <b>cAMP and cGMP biosynthesis</b> |                                                                                                 |          |          |          |
| Gnao1                             | guanine nucleotide-binding protein G(o) subunit alpha                                           | DOWN(D)  | -1,41267 | 0,012449 |
| Rxfp1                             | relaxin family peptide receptor 1                                                               | DOWN(D)  | -1,38785 | 0,013621 |
| Adcy1                             | adenylate cyclase 1 [EC:4.6.1.1]                                                                | DOWN(D)  | -1,24772 | 0,013178 |
| Adrb3                             | adrenergic receptor beta-3                                                                      | DOWN(D)  | -1,21197 | 0,002305 |
| Glp1r                             | glucagon-like peptide 1 receptor                                                                | DOWN(D)  | -1,1953  | 0,000924 |
| Nppa                              | natriuretic peptide A                                                                           | DOWN(D)  | -1,12655 | 0,000283 |
| Adcy8                             | Adenylate cyclase type 8                                                                        | DOWN(8)  | -1,05135 | 0,001078 |
| <b>Blood pressure regulation</b>  |                                                                                                 |          |          |          |
| Adra1a                            | adrenergic receptor alpha-1A                                                                    | DOWN(D)  | -1,73527 | 0,00122  |
| Npr3                              | atrial natriuretic peptide clearance receptor                                                   | DOWN(D)  | -1,52009 | 0,000709 |
| Ace3                              | peptidyl-dipeptidase A [EC:3.4.15.1]                                                            | DOWN(12) | -1,15522 | 0,000219 |
| Corin                             | atrial natriuretic peptide-converting enzyme [EC:3.4.21.-]                                      | DOWN(12) | -1,15145 | 0,00092  |
| Tnni3k                            | Serine/threonine-protein kinase TNNI3K                                                          | DOWN(8)  | -1,00934 | 0,014761 |
| <b>Gene/protein regulation</b>    |                                                                                                 |          |          |          |
| Csdc2                             | cold shock domain containing C2, RNA binding                                                    | DOWN(D)  | -1,76843 | 0,001264 |
| Ckm                               | E3 ubiquitin-protein ligase TRIM63                                                              | DOWN(8)  | -1,68995 | 0,001892 |
| Rbm20                             | RNA-binding protein 20                                                                          | DOWN(D)  | -1,67619 | 0,001821 |
| Esr2                              | estrogen receptor beta                                                                          | DOWN(D)  | -1,51308 | 0,00245  |
| Klhl31                            | kelch-like protein 31                                                                           | DOWN(8)  | -1,42214 | 0,001068 |
| Cst8                              | cystatin-8                                                                                      | DOWN(8)  | -1,30161 | 2,08E-06 |
| Trim63                            | tripartite motif-containing protein 63 [EC:2.3.2.27]                                            | DOWN(8)  | -1,26794 | 0,002642 |
| Eef1a2                            | elongation factor 1-alpha                                                                       | DOWN(8)  | -1,10921 | 0,001195 |
| Nova2                             | Polypyrimidine tract-binding protein 2                                                          | DOWN(12) | -1,04812 | 0,002358 |
| Ebf2                              | Transcription factor COE2                                                                       | DOWN(8)  | -1,02657 | 0,004055 |
| Elavl2                            | ELAV-like protein 2                                                                             | DOWN(12) | -1,02007 | 0,011519 |
| <b>Transport</b>                  |                                                                                                 |          |          |          |
| Kcnj3                             | potassium inwardly-rectifying channel subfamily J member 3                                      | DOWN(D)  | -1,51171 | 0,015166 |
| Adprhl1                           | ADP-ribosylhydrolase like 1                                                                     | DOWN(12) | -1,30803 | 0,003794 |
| Aqp7                              | aquaporin-7                                                                                     | DOWN(D)  | -1,2781  | 0,005235 |
| Slc5a12                           | solute carrier family 5 (sodium-coupled monocarboxylate transporter), member 8/12               | DOWN(D)  | -1,26125 | 0,014509 |
| Slc2a4                            | MFS transporter, SP family, solute carrier family 2 (facilitated glucose transporter), member 4 | DOWN(D)  | -1,25699 | 0,006532 |
| Doc2g                             | double C2-like domain-containing protein gamma                                                  | DOWN(12) | -1,21385 | 0,002939 |
| Lrp3                              | low-density lipoprotein receptor-related protein 3/10/12                                        | DOWN(12) | -1,14528 | 0,013666 |
| Fabp3                             | fatty acid-binding protein 3, muscle and heart                                                  | DOWN(12) | -1,11428 | 0,001624 |
| Mb                                | myoglobin                                                                                       | DOWN(D)  | -1,10865 | 0,00437  |
| Slc38a5                           | solute carrier family 38 (sodium-coupled neutral amino acid transporter), member 5              | DOWN(D)  | -1,05608 | 0,002482 |
| Atp1a2                            | Sodium/potassium-transporting ATPase subunit alpha-2                                            | DOWN(8)  | -1,03719 | 0,000263 |
| Atp13a4                           | Probable cation-transporting ATPase 13A4                                                        | DOWN(8)  | -1,02692 | 0,003493 |
| Kcnk3                             | Potassium channel subfamily K member 3                                                          | DOWN(8)  | -1,00991 | 0,000719 |
| <b>Signal transduction</b>        |                                                                                                 |          |          |          |

|                                 |                                                                                 |          |          |          |
|---------------------------------|---------------------------------------------------------------------------------|----------|----------|----------|
| Ucp1                            | solute carrier family 25 (mitochondrial uncoupling protein), member 7           | DOWN(8)  | -1,6587  | 0,000398 |
| Mpp3                            | MAGUK p55 subfamily member 3                                                    | DOWN(D)  | -1,36734 | 0,002995 |
| Scube2                          | signal peptide, CUB and EGF-like domain-containing protein 2                    | DOWN(D)  | -1,16772 | 0,001641 |
| Hcar1                           | Hydroxycarboxylic acid receptor 1                                               | DOWN(12) | -1,16474 | 0,00307  |
| ErbB4                           | receptor tyrosine-protein kinase erbB-4 [EC:2.7.10.1]                           | DOWN(D)  | -1,14125 | 0,009709 |
| Lgr6                            | leucine-rich repeat-containing G protein-coupled receptor 6                     | DOWN(12) | -1,07716 | 0,001466 |
| Paqr9                           | progesterone and adipoQ receptor family member IX                               | DOWN(D)  | -1,04455 | 0,001391 |
| Itga8                           | Integrin alpha-8                                                                | DOWN(8)  | -1,02737 | 0,000599 |
| <b>Cell cycle</b>               |                                                                                 |          |          |          |
| Cidec                           | cell death-inducing DFFA-like effector c                                        | DOWN(D)  | -1,26985 | 0,017819 |
| Gsn                             | Gelsolin                                                                        | DOWN(8)  | -1,03578 | 5,24E-06 |
| <b>PRRs and other receptors</b> |                                                                                 |          |          |          |
| Cd209a                          | CD209 antigen-like protein A                                                    | DOWN(12) | -1,17387 | 0,008003 |
| <b>Others</b>                   |                                                                                 |          |          |          |
| Tshr                            | Thyrotropin receptor                                                            | DOWN(D)  | -1,76475 | 0,003504 |
| Fendrr                          | NA                                                                              | DOWN(D)  | -1,40719 | 0,004302 |
| Gsg1l                           | Germ cell-specific gene 1-like protein                                          | DOWN(D)  | -1,30943 | 0,005855 |
| Krt13                           | Keratin, type I cytoskeletal 13                                                 | DOWN(8)  | -1,29005 | 0,036135 |
| Adamts17                        | a disintegrin and metalloproteinase with thrombospondin motifs 17 [EC:3.4.24.-] | DOWN(D)  | -1,25736 | 0,00268  |
| Mlip                            | Muscular LMNA-interacting protein                                               | DOWN(12) | -1,18391 | 0,029693 |
| Rptn                            | Repetin                                                                         | DOWN(8)  | -1,17084 | 0,020501 |
| Acvr1c                          | activin receptor type-1C [EC:2.7.11.30]                                         | DOWN(D)  | -1,13719 | 0,002813 |
| Sphkap                          | A-kinase anchor protein SPHKAP                                                  | DOWN(8)  | -1,10536 | 0,000819 |
| Car3                            | Carbonic anhydrase 3                                                            | DOWN(D)  | -1,07018 | 0,014829 |
| Irs1                            | Insulin receptor substrate 1                                                    | DOWN(12) | -1,06038 | 0,002529 |
| Trim67                          | Tripartite motif-containing protein 67                                          | DOWN(12) | -1,04076 | 0,000549 |
| Mtcl1                           | Microtubule cross-linking factor 1                                              | DOWN(8)  | -1,03356 | 0,001025 |
| Nckap5                          | Nck-associated protein 5-like                                                   | DOWN(8)  | -1,02879 | 0,000565 |
| Inmt                            | Indolethylamine N-methyltransferase                                             | DOWN(8)  | -1,01816 | 0,000597 |
| Adamts19                        | disintegrin and metalloproteinase with thrombospondin motifs 19                 | DOWN(12) | -1,0127  | 0,01235  |
| <b>No annotation found</b>      |                                                                                 |          |          |          |
| Tmem182                         | NA                                                                              | DOWN(8)  | -1,52722 | 0,002295 |
| 9330159F19Rik                   | NA                                                                              | DOWN(D)  | -1,46908 | 0,001081 |
| Prrt4                           | Proline-rich transmembrane protein 4                                            | DOWN(D)  | -1,2205  | 0,002247 |
| Tspan18                         | Tetraspanin-18                                                                  | DOWN(D)  | -1,20367 | 0,00951  |
| Gm34595                         | NA                                                                              | DOWN(D)  | -1,18726 | 0,001482 |
| Tmem121b                        | NA                                                                              | DOWN(8)  | -1,17223 | 0,00053  |
| Ankrd63                         | NA                                                                              | DOWN(12) | -1,17033 | 0,000733 |
| 1110002E22Rik                   | RIKEN cDNA 1110002E22 gene                                                      | DOWN(8)  | -1,1566  | 0,003219 |
| Klra14-ps                       | killer cell lectin-like receptor subfamily A, member 14, pseudogene             | DOWN(12) | -1,1553  | 0,01856  |
| Sbk3                            | serine/threonine-protein kinase SBK [EC:2.7.11.1]                               | DOWN(D)  | -1,1166  | 0,000692 |
| Platr21                         | pluripotency associated transcript 21                                           | DOWN(12) | -1,00796 | 0,008207 |
