# Supplementary material for: Transcriptional profiling of a fungal granuloma reveals a low metabolic activity of Paracoccidioides brasiliensis yeasts and an actively regulated host immune response
Source: PubMed Central journal article supplement (PMC10585178; doi:10.3389/fcimb.2023.1268959), 2023-10-05
Supplement: Table_4.pdf [file Table_4.pdf]

**Supplementary Table 4. Mice genes found exclusively in the infection.**

| <b>Acession number</b>                     | <b>Protein</b>                                                      |
|--------------------------------------------|---------------------------------------------------------------------|
| <b>PRRs and other receptors</b>            |                                                                     |
| Itln1                                      | Intelectin-1a                                                       |
| Clec4b2                                    | C-type lectin domain family 6 member A                              |
| Klrb1                                      | Killer cell lectin-like receptor subfamily B member 1               |
| Cd209e                                     | CD209 antigen-like protein E                                        |
| <b>Antigen processing and presentation</b> |                                                                     |
| Trav6-1                                    | T cell receptor alpha variable 6-1                                  |
| Trav7-1                                    | T cell receptor alpha variable 7-1                                  |
| Trav6-2                                    | T cell receptor alpha variable 6-2                                  |
| Trav6d-3                                   | T cell receptor alpha variable 6D-3                                 |
| Trav6d-4                                   | T cell receptor alpha variable 6D-4                                 |
| Trav7d-4                                   | T cell receptor alpha variable 7D-4                                 |
| Trav6d-7                                   | T cell receptor alpha variable 6D-7                                 |
| Trav7n-4                                   | T cell receptor alpha variable 7N-4                                 |
| Trav9n-1                                   | T cell receptor alpha variable 9N-1                                 |
| Trav6-3                                    | T cell receptor alpha variable 6-3                                  |
| Trav7-4                                    | T cell receptor alpha variable 7-4                                  |
| Trav9-1                                    | T cell receptor alpha variable 9-1                                  |
| Trav6-5                                    | T cell receptor alpha variable 6-5                                  |
| Trav6-7-dv9                                | T cell receptor alpha variable 6-7-DV9                              |
| <b>Cytokines and chemokines</b>            |                                                                     |
| Il17a                                      | interleukin 17A                                                     |
| Il17f                                      | interleukin 17F                                                     |
| Il21                                       | interleukin 21                                                      |
| Ccl1                                       | C-C motif chemokine 1                                               |
| Il13ra2                                    | interleukin 13 receptor alpha-2                                     |
| <b>Pro-inflammatory</b>                    |                                                                     |
| Fcnb                                       | ficolin                                                             |
| Prg3                                       | Proteoglycan 3                                                      |
| Saa4                                       | Serum amyloid A-4 protein                                           |
| Mpo                                        | Myeloperoxidase                                                     |
| Ctsg                                       | Cathepsin G                                                         |
| <b>Regulation and tissue repair</b>        |                                                                     |
| Mmp1b                                      | Matrix metalloproteinase-1 (interstitial collagenase) [EC:3.4.24.7] |
| Mmp7                                       | Matrix metalloproteinase-7 (matrilysin, uterine) [EC:3.4.24.23]     |
| Tff1                                       | Trefoil factor 1                                                    |
| Btn1                                       | Butyrophilin-like protein 1                                         |
| Fnd3c2                                     | Fibronectin type III domain-containing 3C2                          |
| <b>Antibody</b>                            |                                                                     |
| Igkv9-128                                  | Immunoglobulin kappa chain variable 9-128                           |
| Igkv9-119                                  | Immunoglobulin kappa chain variable 9-119                           |
| Igkv11-118                                 | Immunoglobulin kappa chain variable 11-118                          |
| Igkv11-114                                 | Immunoglobulin kappa chain variable 11-114                          |

|                                                      |                                                                                    |
|------------------------------------------------------|------------------------------------------------------------------------------------|
| Igkv11-106                                           | Immunoglobulin kappa variable 11-106                                               |
| Igkv12-67                                            | Immunoglobulin kappa chain variable 12-67                                          |
| Igkv13-64                                            | Immunoglobulin kappa chain variable 13-64                                          |
| Ighd5-5                                              | Immunoglobulin heavy diversity 5-5                                                 |
| Ighd5-4                                              | Immunoglobulin heavy diversity 5-4                                                 |
| Ighd5-3                                              | Immunoglobulin heavy diversity 5-3                                                 |
| Ighd5-2                                              | Immunoglobulin heavy diversity 5-2                                                 |
| Ighv5-3                                              | Immunoglobulin heavy variable V5-3                                                 |
| Ighv5-8                                              | Immunoglobulin heavy variable V5-8                                                 |
| Ighv1-16                                             | Immunoglobulin heavy variable V1-16                                                |
| <b>Cell adhesion, activation and differentiation</b> |                                                                                    |
| Fgf23                                                | Fibroblast growth factor 23                                                        |
| Madcam1                                              | Mucosal addressin cell adhesion molecule 1                                         |
| Lrfrn5                                               | Leucine-rich repeat and fibronectin type-III domain-containing protein 5           |
| Prss16                                               | Thymus-specific serine protease                                                    |
| Krt1                                                 | Keratin, type I cytoskeletal 19                                                    |
| <b>Gene/protein regulation</b>                       |                                                                                    |
| Glrp1                                                | Glrp1 protein                                                                      |
| Gbx2                                                 | Homeobox protein GBX-2                                                             |
| Prss50                                               | Probable threonine protease PRSS50                                                 |
| Wfdc18                                               | WAP four-disulfide core domain protein 18                                          |
| St6galnac1                                           | Alpha-N-acetylgalactosaminide alpha-2,6-sialyltransferase 1                        |
| Cebpe                                                | CCAAT/enhancer-binding protein epsilon                                             |
| Csta3                                                | Cystatin A family member 3                                                         |
| Prss22                                               | Brain-specific serine protease 4                                                   |
| <b>Signal transduction</b>                           |                                                                                    |
| Npbwr1                                               | neuropeptides B/W receptor 1                                                       |
| Epha8                                                | Ephrin type-A receptor 8                                                           |
| Pde6h                                                | Retinal cone rhodopsin-sensitive cGMP 3',5'-cyclic phosphodiesterase subunit gamma |
| Drd1                                                 | D(1A) dopamine receptor                                                            |
| Vmn2r95                                              | Vomer nasal 2, receptor 95                                                         |
| Adgrf1                                               | Adhesion G-protein coupled receptor F1                                             |
| <b>Cell cycle</b>                                    |                                                                                    |
| Ms4a3                                                | Membrane-spanning 4-domains subfamily A member 3                                   |
| Nap1l2                                               | Nucleosome assembly protein 1-like 2                                               |
| <b>Coagulation</b>                                   |                                                                                    |
| F13b                                                 | Coagulation factor XIII B chain                                                    |
| Fga                                                  | Fibrinogen alpha chain                                                             |
| <b>Lipid metabolism</b>                              |                                                                                    |
| Apoc2                                                | Apolipoprotein C-II                                                                |
| <b>Transport</b>                                     |                                                                                    |
| Mgarp                                                | Protein MGARP                                                                      |
| <b>Iron retention</b>                                |                                                                                    |
| Timd2                                                | T-cell immunoglobulin and mucin domain-containing protein 2                        |
| <b>Others</b>                                        |                                                                                    |
| Pdyn                                                 | Proenkephalin-B                                                                    |

|                            |                                                         |
|----------------------------|---------------------------------------------------------|
| Ccin                       | Calicin                                                 |
| Speer1                     | Spermatogenesis-associated glutamate (E)-rich protein 1 |
| Dspp                       | Dentin sialophosphoprotein                              |
| Dmp1                       | Dentin matrix acidic phosphoprotein 1                   |
| Npy                        | Pro-neuropeptide Y                                      |
| Prok2                      | Prokineticin-2                                          |
| Lrrn1                      | Leucine-rich repeat neuronal protein 1                  |
| Dll3                       | Delta-like protein 3                                    |
| Olf527                     | Olfactory receptor 527                                  |
| Olf531                     | Olfactory receptor 531                                  |
| Olf46                      | Olfactory receptor 46                                   |
| Dlgap2                     | Disks large-associated protein 2                        |
| Snord59a                   | Small nucleolar RNA, C/D box 59A                        |
| Pkd11                      | Polycystic kidney disease protein 1-like 1              |
| Olf56                      | Olfactory receptor 56                                   |
| Tmem132e                   | Transmembrane protein 132E                              |
| Mir484                     | microRNA 484                                            |
| Speer2                     | Spermatogenesis-associated glutamate (E)-rich protein 2 |
| Tmprss3                    | Transmembrane protease serine 3                         |
| Olf113                     | Olfactory receptor 113                                  |
| Olf114                     | Olfactory receptor 114                                  |
| Olf115                     | Olfactory receptor 115                                  |
| Olf116                     | Olfactory receptor 116                                  |
| Olf127                     | Olfactory receptor 127                                  |
| Olf128                     | Olfactory receptor 128                                  |
| Oosp2                      | Oocyte-secreted protein 2                               |
| Ct55                       | Cancer/testis antigen 55                                |
| <b>No annotation found</b> |                                                         |
| Mroh3                      | Maestro heat-like repeat family member 3                |
| Tmem236                    | Transmembrane protein 236                               |
| Gm6455                     |                                                         |
| Gm8871                     |                                                         |
| Gm5861                     |                                                         |
| Gm8890                     |                                                         |
| Gm8897                     |                                                         |
| Gm6460                     |                                                         |
| Gm8922                     |                                                         |
| Gm8926                     |                                                         |
| 4933402N22Rik              |                                                         |
| Gm10144                    |                                                         |
| 4930438A08Rik              | L-amino-acid oxidase [EC:1.4.3.2]                       |
| Lypd8l                     |                                                         |
| Gm11634                    |                                                         |
| 1700012B07Rik              |                                                         |
| Gm11735                    |                                                         |
| Tcstv1                     | 2-cell-stage, variable group, member 1                  |

|         |
|---------|
| Gm4131  |
| Gm4606  |
| Gm14718 |
| Gm25520 |
| Gm20807 |
| Gm20831 |
