# Supplementary material for: Transcriptional profiling of a fungal granuloma reveals a low metabolic activity of Paracoccidioides brasiliensis yeasts and an actively regulated host immune response
Source: PubMed Central journal article supplement (PMC10585178; doi:10.3389/fcimb.2023.1268959), 2023-10-05
Supplement: Table_7.pdf [file Table_7.pdf]

**Supplementary Table 7. Upregulated yeasts genes.**

| Acession number                             | Protein                                                                                               | Expression status | Log (Fold Change) | Adjusted p-value |
|---------------------------------------------|-------------------------------------------------------------------------------------------------------|-------------------|-------------------|------------------|
| <b>Siderophores synthesis and transport</b> |                                                                                                       |                   |                   |                  |
| PADG_00097                                  | L-ornithine N5-oxygenase SidA                                                                         | UP(D)             | 3,594664          | 2,31522E-08      |
| PADG_00095                                  | MFS siderochrome iron transporter 1                                                                   | UP(D)             | 3,188131          | 1,11937E-08      |
| PADG_00103                                  | ABC transporter 1                                                                                     | UP(D)             | 2,774636          | 3,70273E-08      |
| PADG_00100                                  | Hydroxyornithine transacylase SID3                                                                    | UP(D)             | 2,354155          | 3,39742E-06      |
| PADG_00102                                  | fusarinine C synthase                                                                                 | UP(D)             | 2,227774          | 5,25749E-07      |
| PADG_00104                                  | Oxidoreductase OXR1                                                                                   | UP(D)             | 1,957033          | 4,86888E-05      |
| PADG_00099                                  | Acyl-CoA ligase SIDI                                                                                  | UP(D)             | 1,406269          | 8,21301E-05      |
| PADG_00096                                  | Probable dehydratase NIT22                                                                            | UP(D)             | 1,181456          | 0,000117426      |
| <b>Virulence factors</b>                    |                                                                                                       |                   |                   |                  |
| PADG_02842                                  | Superoxide dismutase, Cu-Zn                                                                           | UP(D)             | 1,424825          | 3,48438E-05      |
| PADG_04701                                  | alcohol dehydrogenase [EC:1.1.1.-]                                                                    | UP(8)             | 1,042112          | 1,75152E-06      |
| PADG_04274                                  | polysaccharide synthase Cps1                                                                          | UP(8)             | 1,027865          | 0,001102958      |
| <b>Gene/protein regulation</b>              |                                                                                                       |                   |                   |                  |
| PADG_01203                                  | Methyltransf_2 domain-containing protein                                                              | UP(D)             | 2,761002          | 2,59574E-07      |
| PADG_01204                                  | N-acetyltransferase domain-containing protein                                                         | UP(D)             | 1,337301          | 0,000297601      |
| PADG_02981                                  | Putative intracellular protease/amidase                                                               | UP(D)             | 1,326706          | 3,86945E-05      |
| <b>Amino acid metabolism</b>                |                                                                                                       |                   |                   |                  |
| PADG_07440                                  | Amino acid permease                                                                                   | UP(D)             | 1,812242          | 8,64386E-07      |
| PADG_08406                                  | O-acetylhomoserine/O-acetylserine sulfhydrylase [EC:2.5.1.49 2.5.1.47]                                | UP(D)             | 1,637297          | 0,000873306      |
| PADG_00215                                  | aromatic-L-amino-acid/L-tryptophan decarboxylase [EC:4.1.1.28 4.1.1.105]                              | UP(D)             | 1,514618          | 0,000419168      |
| PADG_02214                                  | 4-aminobutyrate aminotransferase / (S)-3-amino-2-methylpropionate transaminase [EC:2.6.1.19 2.6.1.22] | UP(8)             | 1,140801          | 4,11864E-06      |
| <b>Transport</b>                            |                                                                                                       |                   |                   |                  |
| PADG_00917                                  | copper-transporting P-type ATPase                                                                     | UP(D)             | 1,773482          | 0,000919061      |
| PADG_08041                                  | MFS transporter                                                                                       | UP(D)             | 1,566054          | 3,94814E-05      |
| <b>Other metabolisms</b>                    |                                                                                                       |                   |                   |                  |
| PADG_06196                                  | Flavin oxidoreductase hxnT                                                                            | UP(D)             | 1,98727           | 4,73024E-06      |
| PADG_03085                                  | Mannose-P-dolichol utilization defect 1 protein homolog                                               | UP(12)            | 1,076101          | 0,000243588      |
| PADG_05433                                  | pyridoxamine 5'-phosphate oxidase [EC:1.4.3.5]                                                        | UP(8)             | 1,032033          | 5,69744E-05      |
| <b>Cell cycle</b>                           |                                                                                                       |                   |                   |                  |
| PADG_07329                                  | Pfam: hepsim                                                                                          | UP(D)             | 2,313777          | 0,001041351      |
| <b>Signal transduction</b>                  |                                                                                                       |                   |                   |                  |
| PADG_00105                                  | Response regulatory domain-containing protein                                                         | UP(D)             | 1,071989          | 0,009366313      |
| <b>No annotation found</b>                  |                                                                                                       |                   |                   |                  |
| PADG_07436                                  | Uncharacterized protein                                                                               | UP(12)            | 1,174975          | 0,002752736      |
| PADG_02015                                  | Uncharacterized protein                                                                               | UP(8)             | 1,159171          | 5,5054E-06       |

|            |                                       |        |          |             |
|------------|---------------------------------------|--------|----------|-------------|
| PADG_04104 | Uncharacterized protein               | UP(8)  | 1,158234 | 5,37787E-05 |
| PADG_04228 | Uncharacterized protein               | UP(12) | 1,042927 | 0,010131922 |
| PADG_01316 | Uncharacterized protein               | UP(8)  | 1,035318 | 0,001020631 |
| PADG_08359 | Short-chain dehydrogenase/reductase 2 | UP(8)  | 1,014308 | 0,00023174  |
| PADG_08475 | Bys1 family protein                   | UP(D)  | 1,013813 | 2,79248E-05 |
