# Supplementary material for: Transcriptional profiling of a fungal granuloma reveals a low metabolic activity of Paracoccidioides brasiliensis yeasts and an actively regulated host immune response
Source: PubMed Central journal article supplement (PMC10585178; doi:10.3389/fcimb.2023.1268959), 2023-10-05
Supplement: Table_8.pdf [file Table_8.pdf]

**Supplementary Table 8. Downregulated yeasts genes.**

| Acession number                | Protein                                                                          | Expression status | Log (Fold Change) | Adjusted p-value |
|--------------------------------|----------------------------------------------------------------------------------|-------------------|-------------------|------------------|
| <b>Gene/protein regulation</b> |                                                                                  |                   |                   |                  |
| PADG_00073                     | SAM-dependent methyltransferase<br>UbiE/COQ5 family protein                      | DOWN(8)           | -1,39758          | 0,001413293      |
| PADG_00517                     | DnaJ domain-containing protein                                                   | DOWN(D)           | -1,27835          | 0,000881547      |
| PADG_04314                     | Zn(2)-C6 fungal-type domain-containing protein                                   | DOWN(8)           | -1,24281          | 4,13477E-05      |
| PADG_05381                     | RNA recognition motif containing protein                                         | DOWN(12)          | -1,23434          | 0,001365058      |
| PADG_04889                     | Zn(2)-C6 fungal-type domain-containing protein                                   | DOWN(D)           | -1,23166          | 0,002812763      |
| PADG_05497                     | GATA-binding protein, other eukaryote                                            | DOWN(D)           | -1,22538          | 0,002127227      |
| PADG_02195                     | DNA repair protein Swi5/Sae3                                                     | DOWN(8)           | -1,21794          | 0,001339732      |
| PADG_04429                     | Structure-specific endonuclease subunit SLX4                                     | DOWN(8)           | -1,14817          | 0,000989517      |
| PADG_12501                     | CCHC-type domain-containing protein                                              | DOWN(12)          | -1,12982          | 0,001179446      |
| PADG_11403                     | methyltransferase                                                                | DOWN(12)          | -1,11346          | 0,000977374      |
| PADG_11441                     | HTH CENPB-type domain-containing protein                                         | DOWN(8)           | -1,11024          | 0,000930833      |
| PADG_01793                     | Nuclear architecture-related protein 1                                           | DOWN(D)           | -1,10606          | 0,006768258      |
| PADG_03377                     | Ubiquitin-like-specific protease type IV protein arginine                        | DOWN(12)          | -1,09838          | 0,001866278      |
| PADG_03791                     | methyltransferase [EC:2.1.1.322]                                                 | DOWN(8)           | -1,08822          | 0,005202474      |
| PADG_01183                     | TAM domain methyltransferase                                                     | DOWN(12)          | -1,07928          | 0,002060487      |
| PADG_00670                     | TAM domain methyltransferase                                                     | DOWN(D)           | -1,07707          | 0,001051091      |
| PADG_00411                     | C6 transcription factor (Ctf1B)                                                  | DOWN(D)           | -1,05195          | 0,005550265      |
| PADG_12203                     | ribosomal biogenesis protein LAS1                                                | DOWN(8)           | -1,0468           | 0,000603147      |
| PADG_00759                     | prefoldin subunit 4                                                              | DOWN(8)           | -1,04389          | 0,003743707      |
| PADG_01958                     | Translation initiation factor 4E                                                 | DOWN(12)          | -1,04272          | 0,007995696      |
| PADG_02035                     | Non-specific serine/threonine protein kinase                                     | DOWN(8)           | -1,04168          | 0,004765044      |
| PADG_03501                     | CCHC-type domain-containing protein                                              | DOWN(12)          | -1,04116          | 0,002060487      |
| PADG_04908                     | InfB (Translation initiation factor) domain-containing protein                   | DOWN(12)          | -1,03846          | 0,00417871       |
| PADG_03236                     | DNA-binding protein creA                                                         | DOWN(12)          | -1,03587          | 0,004856195      |
| PADG_00373                     | NmrA domain-containing protein                                                   | DOWN(8)           | -1,03413          | 0,000626493      |
| PADG_04616                     | Smad nuclear-interacting protein 1                                               | DOWN(12)          | -1,03304          | 0,004737069      |
| PADG_06413                     | C6 finger domain transcription factor nscR                                       | DOWN(8)           | -1,00975          | 0,008026004      |
| PADG_05350                     | Surfeit locus protein 5 subunit 22 of mediator complex-domain-containing protein | DOWN(8)           | -1,00864          | 0,016467202      |
| PADG_04917                     | SprT-like domain-containing protein                                              | DOWN(12)          | -1,00771          | 0,005081481      |

|                          |                                       |          |          |             |
|--------------------------|---------------------------------------|----------|----------|-------------|
|                          | eukaryotic translation initiation     |          |          |             |
| PADG_00716               | factor 2C                             | DOWN(8)  | -1,00712 | 8,67927E-05 |
| PADG_07794               | EKC/KEOPS complex subunit BUD32       | DOWN(12) | -1,00227 | 0,017543585 |
| <b>Energy metabolism</b> |                                       |          |          |             |
|                          | 3-oxoacyl-[acyl-carrier-protein]      |          |          |             |
| PADG_07982               | reductase                             | DOWN(D)  | -1,6235  | 0,000507095 |
| PADG_11844               | aconitate hydratase                   | DOWN(D)  | -1,52072 | 0,010419846 |
|                          | glucan 1,3-beta-glucosidase           |          |          |             |
| PADG_07615               | [EC:3.2.1.58]                         | DOWN(D)  | -1,47922 | 0,000308752 |
| PADG_00393               | hexokinase [EC:2.7.1.1]               | DOWN(12) | -1,38879 | 0,000134246 |
| PADG_03602               | acyl-CoA dehydrogenase                | DOWN(D)  | -1,32085 | 0,000697344 |
| PADG_04322               | rhodocoxin reductase                  | DOWN(8)  | -1,30477 | 0,000335187 |
|                          | NADH dehydrogenase (ubiquinone) 1     |          |          |             |
| PADG_04699               | alpha subcomplex subunit 2            | DOWN(D)  | -1,24476 | 0,000708432 |
|                          | benzoate 4-monooxygenase              |          |          |             |
| PADG_00403               | cytochrome P450                       | DOWN(D)  | -1,17316 | 0,000793491 |
|                          | succinate dehydrogenase               |          |          |             |
|                          | (ubiquinone) iron-sulfur subunit      |          |          |             |
| PADG_08013               | [EC:1.3.5.1]                          | DOWN(12) | -1,14543 | 0,001432556 |
|                          | succinate dehydrogenase               |          |          |             |
|                          | (ubiquinone) membrane anchor          |          |          |             |
| PADG_06764               | subunit                               | DOWN(D)  | -1,10912 | 0,003020469 |
|                          | sulfite reductase (NADPH)             |          |          |             |
|                          | hemoprotein beta-component            |          |          |             |
| PADG_03395               | [EC:1.8.1.2]                          | DOWN(8)  | -1,10366 | 3,97735E-06 |
| PADG_05273               | PNPLA domain-containing protein       | DOWN(12) | -1,07871 | 0,000294774 |
|                          | Cytochrome b5 heme-binding            |          |          |             |
| PADG_05290               | domain-containing protein             | DOWN(D)  | -1,07453 | 0,005482746 |
|                          | NADH dehydrogenase (ubiquinone)       |          |          |             |
| PADG_08216               | Fe-S protein 8 [EC:7.1.1.2]           | DOWN(D)  | -1,05558 | 0,003519666 |
|                          | Mitochondrial zinc maintenance        |          |          |             |
| PADG_03050               | protein 1, mitochondria               | DOWN(8)  | -1,01841 | 0,002043982 |
| <b>Cell cycle</b>        |                                       |          |          |             |
| PADG_03379               | Ras homolog gene family, member A     | DOWN(8)  | -1,47733 | 0,000980373 |
| PADG_03907               | Calmodulin-binding protein Sha1       | DOWN(D)  | -1,32769 | 0,002625672 |
| PADG_06942               | kinetochore protein Spc24, fungi type | DOWN(8)  | -1,25839 | 0,00733853  |
| PADG_03022               | PLK/PLK1 protein kinase               | DOWN(D)  | -1,25446 | 0,002207404 |
| PADG_03336               | annexin ANXC4                         | DOWN(12) | -1,24611 | 0,002362671 |
| PADG_00567               | Cell division control protein         | DOWN(D)  | -1,24467 | 0,007797456 |
| PADG_02357               | kinetochore protein Spc25, fungi type | DOWN(D)  | -1,23929 | 0,000591552 |
|                          | serine/threonine-protein kinase       |          |          |             |
| PADG_11709               | TTK/MPS1 [EC:2.7.12.1]                | DOWN(D)  | -1,23479 | 5,54006E-05 |
| PADG_01088               | Ase1/PRC1/MAP65 family protein        | DOWN(8)  | -1,20056 | 0,005994429 |
| PADG_03219               | Myosin regulatory light chain cdc4    | DOWN(8)  | -1,18769 | 0,006834469 |
| PADG_02243               | Spo12 family protein                  | DOWN(12) | -1,12485 | 0,002901531 |
| PADG_01683               | GTPase binding protein Rid1           | DOWN(D)  | -1,1012  | 0,000230408 |
| PADG_06409               | protein OPY2                          | DOWN(12) | -1,07115 | 0,005650656 |
|                          | NIMA (never in mitosis gene a)-       |          |          |             |
| PADG_04667               | related kinase 2 [EC:2.7.11.1]        | DOWN(12) | -1,07109 | 0,007872998 |

|                              |                                                                                                                |          |          |             |
|------------------------------|----------------------------------------------------------------------------------------------------------------|----------|----------|-------------|
| PADG_01930                   | Uncharacterized protein                                                                                        | DOWN(8)  | -1,06836 | 5,69744E-05 |
| <b>Virulence factors</b>     |                                                                                                                |          |          |             |
| PADG_01954                   | superoxide dismutase, Fe-Mn family<br>[EC:1.15.1.1]                                                            | DOWN(D)  | -2,55152 | 5,85186E-06 |
| PADG_02598                   | beta-glucosidase                                                                                               | DOWN(D)  | -1,6122  | 1,11583E-06 |
| PADG_05660                   | Fungal nitric oxide reductase                                                                                  | DOWN(D)  | -1,38287 | 0,007156901 |
| PADG_01716                   | alcohol dehydrogenase zinc-binding                                                                             | DOWN(D)  | -1,35725 | 0,000574079 |
| PADG_01987                   | alcohol dehydrogenase                                                                                          | DOWN(8)  | -1,2762  | 0,007506831 |
| PADG_05344                   | thioredoxin-dependent peroxiredoxin<br>[EC:1.11.1.24]                                                          | DOWN(D)  | -1,22454 | 0,006713465 |
| PADG_12387                   | MFS fluconazole resistance protein                                                                             | DOWN(D)  | -1,22205 | 0,000540352 |
| PADG_03691                   | Glycosidase                                                                                                    | DOWN(12) | -1,20574 | 0,006151669 |
| PADG_05140                   | Protein SUR7                                                                                                   | DOWN(8)  | -1,08391 | 0,000408789 |
| <b>Amino acid metabolism</b> |                                                                                                                |          |          |             |
| PADG_01952                   | asparagine synthase (glutamine-<br>hydrolysing) [EC:6.3.5.4]                                                   | DOWN(D)  | -1,41864 | 0,000120708 |
| PADG_02278                   | 5-aminolevulinatase synthase<br>[EC:2.3.1.37]                                                                  | DOWN(D)  | -1,4147  | 0,003543567 |
| PADG_03785                   | ATP phosphoribosyltransferase                                                                                  | DOWN(8)  | -1,28408 | 0,000449676 |
| PADG_00349                   | kynureninase [EC:3.7.1.3]                                                                                      | DOWN(12) | -1,25626 | 0,004406369 |
| PADG_07609                   | dihydroxy-acid dehydratase<br>[EC:4.2.1.9]                                                                     | DOWN(D)  | -1,23921 | 0,001361747 |
| <b>Other metabolisms</b>     |                                                                                                                |          |          |             |
| PADG_07076                   | flavin-binding monooxygenase                                                                                   | DOWN(D)  | -2,60886 | 2,60265E-07 |
| PADG_00106                   | ectonucleotide<br>pyrophosphatase/phosphodiesterase                                                            | DOWN(8)  | -1,54321 | 4,92606E-05 |
| PADG_07960                   | tetraspanin                                                                                                    | DOWN(D)  | -1,42462 | 0,001086297 |
| PADG_02384                   | porphobilinogen synthase<br>[EC:4.2.1.24]                                                                      | DOWN(D)  | -1,38467 | 0,000980843 |
| PADG_12236                   | thiamine pyrophosphokinase<br>[EC:2.7.6.2]                                                                     | DOWN(12) | -1,35168 | 0,000471889 |
| PADG_00348                   | 7,8-dihydropterin-6-yl-methyl-4-<br>(beta-D-ribofuranosyl)aminobenzene<br>5'-phosphate synthase [EC:2.5.1.105] | DOWN(8)  | -1,1748  | 0,000429496 |
| PADG_06740                   | betaine aldehyde dehydrogenase                                                                                 | DOWN(D)  | -1,16951 | 0,000879492 |
| PADG_07849                   | N5-hydroxyornithine<br>acetyltransferase [EC:2.3.1.-]                                                          | DOWN(12) | -1,12162 | 0,005081481 |
| PADG_07986                   | gamma-glutamyltranspeptidase /<br>glutathione hydrolase [EC:2.3.2.2<br>3.4.19.13]                              | DOWN(12) | -1,08719 | 0,004937728 |
| PADG_05855                   | gluconolactonase [EC:3.1.1.17]                                                                                 | DOWN(8)  | -1,08609 | 0,009950104 |
| PADG_02285                   | Cytochrome P450-DIT2                                                                                           | DOWN(12) | -1,08483 | 0,002342264 |
| PADG_02123                   | Aflatoxin B1 aldehyde reductase<br>member 2                                                                    | DOWN(12) | -1,08236 | 0,009558458 |
| PADG_03920                   | Tyrosine/serine protein phosphatase                                                                            | DOWN(12) | -1,06263 | 0,004074648 |
| PADG_04432                   | alpha-amylase [EC:3.2.1.1]                                                                                     | DOWN(D)  | -1,06127 | 0,00292087  |
| PADG_05184                   | Ethanolamine-phosphate<br>cytidylyltransferase                                                                 | DOWN(12) | -1,05906 | 0,012720465 |
| PADG_06123                   | Cytidine deaminase-like protein                                                                                | DOWN(8)  | -1,03202 | 0,001677866 |

|                            |                                                                         |          |          |             |
|----------------------------|-------------------------------------------------------------------------|----------|----------|-------------|
| PADG_01233                 | 4HBT domain-containing protein                                          | DOWN(8)  | -1,02317 | 0,004030614 |
| PADG_00400                 | Beta-hexosaminidase                                                     | DOWN(12) | -1,00129 | 0,002159862 |
| <b>Transport</b>           |                                                                         |          |          |             |
| PADG_04197                 | ATP-binding cassette, subfamily G (WHITE), member 2, PDR                | DOWN(D)  | -1,84782 | 0,000495824 |
| PADG_03294                 | P-type Na <sup>+</sup> /K <sup>+</sup> transporter [EC:7.2.2.3 7.2.2.-] | DOWN(D)  | -1,62896 | 1,27763E-06 |
| PADG_04541                 | pH-response regulator protein palA/RIM20                                | DOWN(D)  | -1,34939 | 4,61534E-05 |
| PADG_05084                 | solute carrier family 31 (copper transporter), member 1                 | DOWN(D)  | -1,29919 | 0,001426004 |
| PADG_00924                 | kinesin family protein                                                  | DOWN(8)  | -1,2839  | 0,00294678  |
| PADG_04803                 | NADPH oxidase 1                                                         | DOWN(12) | -1,24725 | 0,00271291  |
| PADG_11807                 | FAD-binding FR-type domain-containing protein                           | DOWN(8)  | -1,20878 | 0,001125053 |
| PADG_05835                 | ATP-binding cassette, subfamily B (MDR/TAP), member 1 [EC:7.6.2.2]      | DOWN(D)  | -1,19516 | 0,011001768 |
| PADG_02809                 | MFS transporter, NNP family, nitrate/nitrite transporter                | DOWN(D)  | -1,17178 | 0,001264654 |
| PADG_00150                 | solute carrier family 20 (sodium-dependent phosphate transporter)       | DOWN(12) | -1,1267  | 0,000887073 |
| PADG_07610                 | MFS transporter                                                         | DOWN(8)  | -1,0765  | 9,48131E-05 |
| PADG_01256                 | MFS sugar transporter                                                   | DOWN(8)  | -1,00564 | 0,038918944 |
| <b>Signal transduction</b> |                                                                         |          |          |             |
| PADG_07386                 | ER membrane protein Wsc4                                                | DOWN(D)  | -1,68009 | 0,002359476 |
| PADG_04598                 | guanine nucleotide-binding protein subunit alpha, other                 | DOWN(D)  | -1,29413 | 5,75891E-05 |
| PADG_04943                 | cell wall integrity and stress response component                       | DOWN(12) | -1,14422 | 0,005000612 |
| PADG_05209                 | PH domain-containing protein                                            | DOWN(12) | -1,07296 | 0,001786692 |
| <b>Membrane antigen</b>    |                                                                         |          |          |             |
| PADG_04649                 | expression library immunization antigen 1                               | DOWN(D)  | -1,36685 | 0,000601332 |
| <b>Lipid metabolism</b>    |                                                                         |          |          |             |
| PADG_12430                 | long-chain acyl-CoA synthetase [EC:6.2.1.3]                             | DOWN(12) | -1,1162  | 0,006151669 |
| <b>No annotation found</b> |                                                                         |          |          |             |
| PADG_00497                 | Uncharacterized protein                                                 | DOWN(D)  | -2,90016 | 3,70273E-08 |
| PADG_08212                 | Uncharacterized protein                                                 | DOWN(D)  | -2,35091 | 3,60126E-06 |
| PADG_05763                 | oxidoreductase                                                          | DOWN(D)  | -2,0453  | 2,86135E-06 |
| PADG_04544                 | Uncharacterized protein                                                 | DOWN(D)  | -1,91389 | 0,000551501 |
| PADG_05362                 | NACHT domain-containing protein                                         | DOWN(D)  | -1,68802 | 0,00019332  |
| PADG_01513                 | Uncharacterized protein                                                 | DOWN(D)  | -1,67529 | 3,73096E-06 |
| PADG_04482                 | Uncharacterized protein                                                 | DOWN(D)  | -1,56185 | 0,000938842 |
| PADG_04785                 | Uncharacterized protein                                                 | DOWN(D)  | -1,50151 | 0,00011005  |
| PADG_11139                 | Uncharacterized protein                                                 | DOWN(D)  | -1,4762  | 0,018354614 |
| PADG_00503                 | Uncharacterized protein                                                 | DOWN(D)  | -1,46718 | 0,000327817 |
| PADG_07981                 | Uncharacterized protein                                                 | DOWN(D)  | -1,45884 | 0,003403167 |

|            |                                               |          |          |             |
|------------|-----------------------------------------------|----------|----------|-------------|
| PADG_05754 | Uncharacterized protein                       | DOWN(12) | -1,45594 | 9,73083E-05 |
| PADG_04024 | Uncharacterized protein                       | DOWN(12) | -1,44864 | 7,38458E-05 |
| PADG_03372 | Uncharacterized protein                       | DOWN(12) | -1,44838 | 0,005023691 |
| PADG_05781 | Uncharacterized protein                       | DOWN(12) | -1,42829 | 0,000183939 |
| PADG_12190 | Uncharacterized protein                       | DOWN(12) | -1,42666 | 0,000243588 |
| PADG_07394 | Uncharacterized protein                       | DOWN(8)  | -1,4086  | 0,004820891 |
| PADG_05485 | Uncharacterized protein                       | DOWN(12) | -1,39678 | 7,84343E-05 |
| PADG_03113 | Uncharacterized protein                       | DOWN(D)  | -1,38151 | 0,003089127 |
| PADG_08719 | Uncharacterized protein                       | DOWN(8)  | -1,3416  | 0,00272488  |
| PADG_07065 | Uncharacterized protein                       | DOWN(D)  | -1,33361 | 0,000686818 |
| PADG_00818 | Uncharacterized protein                       | DOWN(D)  | -1,33086 | 9,32678E-05 |
| PADG_05279 | Uncharacterized protein                       | DOWN(D)  | -1,2711  | 0,001499742 |
| PADG_02439 | Uncharacterized protein                       | DOWN(8)  | -1,25348 | 4,87376E-05 |
| PADG_05859 | Uncharacterized protein                       | DOWN(8)  | -1,24861 | 0,002407308 |
| PADG_12191 | Uncharacterized protein                       | DOWN(8)  | -1,24756 | 0,000240148 |
| PADG_04292 | Uncharacterized protein                       | DOWN(D)  | -1,23515 | 0,002205478 |
| PADG_07555 | Uncharacterized protein                       | DOWN(12) | -1,23084 | 0,002362671 |
| PADG_01986 | Uncharacterized protein                       | DOWN(8)  | -1,21794 | 6,32695E-05 |
|            | NAD dependent<br>epimerase/dehydratase family |          |          |             |
| PADG_07811 | protein                                       | DOWN(D)  | -1,20784 | 0,00231787  |
| PADG_07578 | Uncharacterized protein                       | DOWN(8)  | -1,20592 | 0,000261883 |
| PADG_07577 | Uncharacterized protein                       | DOWN(12) | -1,19359 | 0,002066219 |
| PADG_11879 | Uncharacterized protein                       | DOWN(D)  | -1,18278 | 0,002224044 |
| PADG_00404 | Uncharacterized protein                       | DOWN(D)  | -1,18031 | 0,005307509 |
| PADG_00870 | Uncharacterized protein                       | DOWN(D)  | -1,17394 | 0,003288465 |
| PADG_12220 | Uncharacterized protein                       | DOWN(12) | -1,16256 | 0,000991469 |
| PADG_03654 | Uncharacterized protein                       | DOWN(D)  | -1,16002 | 0,001306557 |
| PADG_02424 | Uncharacterized protein                       | DOWN(8)  | -1,15547 | 0,001755113 |
| PADG_11893 | Uncharacterized protein                       | DOWN(12) | -1,15396 | 0,004605148 |
| PADG_07995 | Uncharacterized protein                       | DOWN(D)  | -1,15316 | 0,005059482 |
| PADG_04591 | Uncharacterized protein                       | DOWN(12) | -1,14988 | 0,003614564 |
| PADG_02738 | Uncharacterized protein                       | DOWN(D)  | -1,14449 | 0,00069151  |
| PADG_07537 | Uncharacterized protein                       | DOWN(8)  | -1,13798 | 0,004147573 |
|            | Protoglobin domain-containing                 |          |          |             |
| PADG_00496 | protein                                       | DOWN(D)  | -1,1375  | 0,003686323 |
| PADG_05629 | heat shock factor-binding protein 1           | DOWN(12) | -1,13576 | 0,003614564 |
| PADG_05755 | Uncharacterized protein                       | DOWN(12) | -1,13568 | 0,001171024 |
| PADG_06800 | Uncharacterized protein                       | DOWN(D)  | -1,13544 | 0,002380642 |
| PADG_00356 | Uncharacterized protein                       | DOWN(12) | -1,13506 | 0,005176819 |
| PADG_05316 | Uncharacterized protein                       | DOWN(8)  | -1,13486 | 0,000416166 |
| PADG_05722 | Uncharacterized protein                       | DOWN(D)  | -1,1342  | 0,001369932 |
| PADG_05496 | Uncharacterized protein                       | DOWN(8)  | -1,13408 | 0,000477489 |
| PADG_06694 | Uncharacterized protein                       | DOWN(12) | -1,13056 | 0,006412308 |
| PADG_01403 | acyltransferase                               | DOWN(D)  | -1,12978 | 0,001403147 |
| PADG_03023 | Oxidoreductase                                | DOWN(12) | -1,12773 | 0,000885066 |
| PADG_07498 | Oxidoreductase                                | DOWN(8)  | -1,12532 | 0,000861917 |

|            |                                                     |          |          |             |
|------------|-----------------------------------------------------|----------|----------|-------------|
| PADG_05753 | Uncharacterized protein                             | DOWN(8)  | -1,12338 | 0,000135921 |
| PADG_08467 | Uncharacterized protein                             | DOWN(D)  | -1,1209  | 0,00138618  |
| PADG_06871 | Uncharacterized protein                             | DOWN(8)  | -1,10938 | 6,70576E-07 |
| PADG_06151 | Uncharacterized protein                             | DOWN(8)  | -1,10801 | 0,000230884 |
| PADG_03140 | phosphotransferase enzyme family protein            | DOWN(12) | -1,10509 | 0,002752736 |
| PADG_11103 | Uncharacterized protein                             | DOWN(8)  | -1,097   | 0,001040947 |
| PADG_11303 | Uncharacterized protein                             | DOWN(12) | -1,09614 | 0,003531071 |
| PADG_05055 | Uncharacterized protein                             | DOWN(8)  | -1,09309 | 0,003184251 |
| PADG_00883 | Uncharacterized protein                             | DOWN(D)  | -1,08791 | 0,002843609 |
| PADG_06173 | Uncharacterized protein                             | DOWN(D)  | -1,08404 | 0,000693875 |
| PADG_02853 | Uncharacterized protein                             | DOWN(12) | -1,08179 | 0,004015094 |
| PADG_07231 | Uncharacterized protein                             | DOWN(12) | -1,08157 | 0,00076621  |
| PADG_11129 | Uncharacterized protein                             | DOWN(8)  | -1,07924 | 0,000525461 |
| PADG_03951 | serine/threonine-protein kinase SRPK3 [EC:2.7.11.1] | DOWN(12) | -1,07696 | 0,007629575 |
| PADG_04507 | Uncharacterized protein                             | DOWN(12) | -1,06913 | 0,002957284 |
| PADG_12300 | Uncharacterized protein                             | DOWN(12) | -1,06597 | 0,006211405 |
| PADG_11071 | DAGKc domain-containing protein                     | DOWN(12) | -1,05966 | 0,002193196 |
| PADG_07110 | Uncharacterized protein                             | DOWN(D)  | -1,05714 | 0,004321106 |
| PADG_06452 | Uncharacterized protein                             | DOWN(8)  | -1,0547  | 8,33183E-05 |
| PADG_00271 | XPG_I_2 domain-containing protein                   | DOWN(12) | -1,05445 | 0,011517685 |
| PADG_05127 | Uncharacterized protein                             | DOWN(12) | -1,04944 | 0,002362671 |
| PADG_06738 | Pkinase_fungal domain-containing protein            | DOWN(8)  | -1,04918 | 0,000429496 |
| PADG_07218 | Uncharacterized protein                             | DOWN(12) | -1,04713 | 0,007910191 |
| PADG_02695 | Uncharacterized protein                             | DOWN(12) | -1,04531 | 0,006151669 |
| PADG_00657 | Uncharacterized protein                             | DOWN(8)  | -1,04435 | 0,002695168 |
| PADG_12146 | Uncharacterized protein                             | DOWN(12) | -1,04241 | 0,006519973 |
| PADG_12416 | Uncharacterized protein                             | DOWN(8)  | -1,04155 | 0,002119758 |
| PADG_01988 | Uncharacterized protein                             | DOWN(D)  | -1,03948 | 0,011937741 |
| PADG_05151 | Uncharacterized protein                             | DOWN(12) | -1,03767 | 0,00458842  |
| PADG_01875 | Uncharacterized protein                             | DOWN(12) | -1,03576 | 0,000991469 |
| PADG_03398 | Uncharacterized protein                             | DOWN(12) | -1,03335 | 0,002097094 |
| PADG_02527 | Oxidoreductase                                      | DOWN(12) | -1,03289 | 0,002544685 |
| PADG_00385 | Uncharacterized protein                             | DOWN(8)  | -1,03252 | 0,00489703  |
| PADG_08414 | Uncharacterized protein                             | DOWN(8)  | -1,02874 | 0,004765044 |
| PADG_08296 | Uncharacterized protein                             | DOWN(8)  | -1,02837 | 0,00406934  |
| PADG_07387 | integral membrane protein                           | DOWN(12) | -1,02707 | 0,002007335 |
| PADG_12182 | Uncharacterized protein                             | DOWN(8)  | -1,02629 | 0,000910933 |
| PADG_07921 | Uncharacterized protein                             | DOWN(12) | -1,02341 | 0,001314486 |
| PADG_00769 | Uncharacterized protein                             | DOWN(8)  | -1,02239 | 0,000148228 |
| PADG_02723 | F-box domain-containing protein                     | DOWN(8)  | -1,02231 | 0,005606739 |
| PADG_08224 | CBS domain-containing protein                       | DOWN(12) | -1,01917 | 0,001451516 |
| PADG_12111 | Uncharacterized protein                             | DOWN(12) | -1,0178  | 0,003149892 |
| PADG_11362 | Goodbye domain-containing protein                   | DOWN(8)  | -1,01503 | 0,000416166 |
| PADG_07074 | Uncharacterized protein                             | DOWN(12) | -1,0115  | 0,012414806 |

|            |                               |          |          |             |
|------------|-------------------------------|----------|----------|-------------|
| PADG_04158 | Uncharacterized protein       | DOWN(8)  | -1,0108  | 0,003914098 |
| PADG_08421 | Uncharacterized protein       | DOWN(12) | -1,01068 | 0,002890692 |
| PADG_06089 | SET domain-containing protein | DOWN(12) | -1,00784 | 0,005120214 |
| PADG_11867 | Uncharacterized protein       | DOWN(8)  | -1,00708 | 0,002742621 |
| PADG_05498 | Uncharacterized protein       | DOWN(8)  | -1,0027  | 0,001841351 |
| PADG_03613 | Uncharacterized protein       | DOWN(12) | -1,00168 | 0,028596545 |
