# Supplementary material for: Transcriptional profiling of a fungal granuloma reveals a low metabolic activity of Paracoccidioides brasiliensis yeasts and an actively regulated host immune response
Source: PubMed Central journal article supplement (PMC10585178; doi:10.3389/fcimb.2023.1268959), 2023-10-05
Supplement: Table_9.pdf [file Table_9.pdf]

**Supplementary Table 9. Downregulated yeast proteins present in the granulomatous lesions.**

| Accession number               | Protein                                                                                                               | Expression status | Log (Fold Change) | Adjusted p-value |
|--------------------------------|-----------------------------------------------------------------------------------------------------------------------|-------------------|-------------------|------------------|
| <b>Gene/protein regulation</b> |                                                                                                                       |                   |                   |                  |
| C1GK81                         | SF3b1 domain-containing protein                                                                                       | DOWN(D)           | -8,24706          | 1,67E-06         |
| C1GKC9                         | Hsp90-like protein                                                                                                    | DOWN(8)           | -7,31103          | 4,46E-05         |
| C1G6I0                         | heat shock 70kDa protein 4                                                                                            | DOWN(8)           | -6,75185          | 4,8E-05          |
| C1GGQ1                         | peptidyl-prolyl isomerase D [EC:5.2.1.8]                                                                              | DOWN(D)           | -6,41275          | 6,51E-05         |
| C1GDK4                         | Pre-mRNA splicing factor                                                                                              | DOWN(8)           | -6,19463          | 0,000537         |
| C1G0E5                         | 40S ribosomal protein S14                                                                                             | DOWN(8)           | -5,76095          | 0,001957         |
| C1G3B1                         | 40S ribosomal protein S12                                                                                             | DOWN(8)           | -5,68669          | 0,000183         |
| A0A0A0HVT2                     | 26S proteasome regulatory subunit T3                                                                                  | DOWN(D)           | -5,52288          | 8,45E-05         |
| C1GJT7                         | mannosyl-oligosaccharide alpha-1,3-glucosidase [EC:3.2.1.207]                                                         | DOWN(8)           | -5,1066           | 0,000974         |
| C1GIA6                         | GrpE protein homolog                                                                                                  | DOWN(D)           | -4,90736          | 0,000115         |
| A0A0A0HYV6                     | 60S ribosomal protein L5                                                                                              | DOWN(D)           | -4,83992          | 0,001244         |
| C1G3T9                         | Ubiquitin-60S ribosomal protein L40                                                                                   | DOWN(D)           | -4,81993          | 4,55E-06         |
| C1GLX8                         | chaperonin GroEL                                                                                                      | DOWN(D)           | -4,75563          | 0,000957         |
| C1GA06                         | Peptidyl-prolyl cis-trans isomerase (PPIase) (EC 5.2.1.8)                                                             | DOWN(8)           | -4,751            | 5,76E-05         |
| C1G953                         | Prohibitin                                                                                                            | DOWN(8)           | -4,75032          | 0,00017          |
| C1G5P0                         | pre-mRNA-splicing helicase BRR2 [EC:3.6.4.13]                                                                         | DOWN(D)           | -4,64777          | 2,39E-05         |
| C1GCK9                         | KOW domain-containing protein                                                                                         | DOWN(D)           | -4,32901          | 0,000367         |
| C1G7B3                         | Fungal_trans domain-containing protein                                                                                | DOWN(D)           | -4,25803          | 8,78E-05         |
| C1G159                         | 26S proteasome regulatory subunit T5                                                                                  | DOWN(8)           | -4,18131          | 0,000219         |
| C1GEW2                         | Single-stranded DNA-binding protein                                                                                   | DOWN(D)           | -4,14922          | 3,58E-05         |
| C1GJD9                         | Dolichyl-diphosphooligosaccharide--protein glycosyltransferase subunit WBP1 (Oligosaccharyl transferase subunit WBP1) | DOWN(D)           | -3,95437          | 4,95E-05         |
| C1G3P2                         | histidyl-tRNA synthetase [EC:6.1.1.21]                                                                                | DOWN(D)           | -3,88974          | 0,002497         |
| C1G3P9                         | calnexin                                                                                                              | DOWN(12)          | -3,47349          | 0,000455         |
| C1G4M5                         | Translation initiation factor RLI1                                                                                    | DOWN(12)          | -3,44291          | 0,002348         |
| C1G0B0                         | 26S protease regulatory subunit 8                                                                                     | DOWN(D)           | -3,40898          | 0,000184         |
| C1GAE3                         | mitochondrial transcription factor 1                                                                                  | DOWN(8)           | -3,30744          | 0,002154         |
| C1GC92                         | Prohibitin                                                                                                            | DOWN(D)           | -3,2977           | 0,000783         |
| C1G0E3                         | 40S ribosomal protein S16                                                                                             | DOWN(8)           | -3,18882          | 0,027828         |
| C1GKL7                         | 60S ribosomal protein L12                                                                                             | DOWN(D)           | -3,12329          | 0,00097          |
| A0A0A0HWY2                     | Ribosomal_L6 domain-containing protein                                                                                | DOWN(D)           | -3,11933          | 0,000447         |
| C1GCN9                         | mannosyl-oligosaccharide glucosidase [EC:3.2.1.106]                                                                   | DOWN(8)           | -2,96435          | 0,000537         |
| C1GIZ3                         | elongation factor 3                                                                                                   | DOWN(8)           | -2,91132          | 0,01155          |
| C1GEV1                         | RNA helicase (EC 3.6.4.13)                                                                                            | DOWN(D)           | -2,68877          | 0,026883         |

|                          |                                                                                              |          |          |          |
|--------------------------|----------------------------------------------------------------------------------------------|----------|----------|----------|
| C1GC66                   | 60S ribosomal protein L22                                                                    | DOWN(D)  | -2,55525 | 0,003243 |
| C1G0P0                   | molecular chaperone DnaK                                                                     | DOWN(12) | -2,42964 | 0,026103 |
| C1GEE2                   | protein disulfide-isomerase A6<br>[EC:5.3.4.1]                                               | DOWN(8)  | -2,22092 | 0,019177 |
| C1G5L7                   | Dolichyl-phosphate-mannose--protein<br>mannosyltransferase (EC 2.4.1.109)                    | DOWN(8)  | -1,56863 | 0,023974 |
| C1GAW5                   | pre-mRNA-processing-splicing factor 8                                                        | DOWN(8)  | -1,43368 | 0,049192 |
| C1FZ98                   | Mitochondrial metallochaperone Sco1                                                          | DOWN(8)  | -1,40066 | 0,027603 |
| <b>Energy metabolism</b> |                                                                                              |          |          |          |
| C1GLB8                   | Malate dehydrogenase (EC 1.1.1.37)                                                           | DOWN(8)  | -8,76505 | 3,33E-06 |
| C1GIX4                   | Malate dehydrogenase (EC 1.1.1.37)                                                           | DOWN(D)  | -8,55589 | 2,1E-05  |
| C1GJI4                   | Transaldolase (EC 2.2.1.2)                                                                   | DOWN(12) | -7,0939  | 3,57E-05 |
| C1G547                   | Pyruvate dehydrogenase (Acetyl-<br>transferring) E1 component, alpha<br>subunit              | DOWN(D)  | -6,41594 | 7,72E-05 |
| C1GIF6                   | ATP synthase subunit 5, mitochondrial                                                        | DOWN(D)  | -6,39389 | 5,17E-05 |
| C1GHR9                   | Acyl-CoA dehydrogenase                                                                       | DOWN(D)  | -6,04624 | 1,37E-05 |
| C1G421                   | acetyl-CoA acyltransferase 1<br>[EC:2.3.1.16]                                                | DOWN(D)  | -5,80073 | 9,78E-05 |
| Q1XA91                   | Cytochrome c oxidase subunit 2                                                               | DOWN(8)  | -5,67874 | 0,00017  |
| C1GBZ4                   | glutamate dehydrogenase (NADP+)<br>[EC:1.4.1.4]                                              | DOWN(8)  | -5,63618 | 0,000217 |
| C1G1C8                   | Fructose-bisphosphate aldolase (FBP<br>aldolase) (EC 4.1.2.13)                               | DOWN(D)  | -5,39239 | 0,000179 |
| C1G911                   | Alternative oxidase (EC 1.-.-.-)                                                             | DOWN(8)  | -5,33852 | 0,001063 |
| C1G2W2                   | Pyruvate kinase (EC 2.7.1.40)                                                                | DOWN(D)  | -5,32367 | 0,00092  |
| C1G736                   | acyl-CoA oxidase [EC:1.3.3.6]                                                                | DOWN(D)  | -5,10798 | 0,000658 |
| C1FZL2                   | Succinate dehydrogenase<br>[ubiquinone] flavoprotein subunit,<br>mitochondrial (EC 1.3.5.1)  | DOWN(D)  | -4,84814 | 0,001121 |
| C1GAG3                   | Isocitrate dehydrogenase [NADP] (EC<br>1.1.1.42)                                             | DOWN(8)  | -4,8401  | 0,00021  |
| C1GDR6                   | Uncharacterized protein                                                                      | DOWN(D)  | -4,83387 | 0,000721 |
| C1G098                   | NADH-ubiquinone oxidoreductase 21<br>kDa subunit                                             | DOWN(8)  | -4,66391 | 0,000522 |
| C1GIX7                   | pyruvate dehydrogenase E2<br>component (dihydrolipoamide<br>acetyltransferase) [EC:2.3.1.12] | DOWN(D)  | -4,53902 | 0,000149 |
| C1GGE5                   | acetyl-CoA C-acetyltransferase<br>[EC:2.3.1.9]                                               | DOWN(8)  | -4,49206 | 0,000276 |
| A0A0A0HTA9               | Cytochrome c1, heme protein,<br>mitochondrial                                                | DOWN(D)  | -4,42711 | 0,000553 |
| C1G2P3                   | enoyl-CoA hydratase [EC:4.2.1.17]                                                            | DOWN(D)  | -4,37849 | 2,82E-05 |
| C1G3G7                   | Isocitrate lyase                                                                             | DOWN(8)  | -4,31998 | 0,00124  |
| C1GM03                   | Cytochrome b-c1 complex subunit 2                                                            | DOWN(D)  | -4,10832 | 0,000135 |
| C1FZY1                   | L-lactate dehydrogenase (cytochrome)<br>[EC:1.1.2.3]                                         | DOWN(8)  | -3,96582 | 0,000926 |
| C1GLZ6                   | Citrate synthase                                                                             | DOWN(D)  | -3,84389 | 0,001893 |

|                  |                                                                                             |          |          |          |
|------------------|---------------------------------------------------------------------------------------------|----------|----------|----------|
| C1G4S5           | Respiratory supercomplex factor 1, mitochondrial                                            | DOWN(D)  | -3,61144 | 0,000846 |
| A0A0A0HST0       | F-type H <sup>+</sup> -transporting ATPase subunit g                                        | DOWN(D)  | -3,39483 | 0,000612 |
| C1G6K0           | Isocitrate dehydrogenase [NAD] subunit, mitochondrial                                       | DOWN(D)  | -3,35986 | 7,17E-05 |
| C1G413           | NADH dehydrogenase [ubiquinone] flavoprotein 1, mitochondrial (EC 7.1.1.2)                  | DOWN(D)  | -3,30789 | 0,004191 |
| C1G294           | succinyl-CoA synthetase alpha subunit [EC:6.2.1.4 6.2.1.5]                                  | DOWN(D)  | -3,29572 | 0,003605 |
| C1GB03           | ATP synthase F1 subunit epsilon                                                             | DOWN(D)  | -3,28825 | 0,005182 |
| C1GCI7           | Isocitrate lyase                                                                            | DOWN(8)  | -3,26015 | 0,000788 |
| C1G9P1           | Isocitrate dehydrogenase [NAD] subunit, mitochondrial                                       | DOWN(D)  | -3,18604 | 4,85E-05 |
| C1G0C7           | succinyl-CoA synthetase beta subunit [EC:6.2.1.4 6.2.1.5]                                   | DOWN(8)  | -2,74039 | 0,024202 |
| C1G4D1           | Dihydrolipoamide acetyltransferase component of pyruvate dehydrogenase complex (EC 2.3.1.-) | DOWN(12) | -2,44792 | 0,002062 |
| C1GDV0           | Cytochrome b-c1 complex subunit Rieske, mitochondrial (EC 7.1.1.8)                          | DOWN(8)  | -2,4296  | 0,007373 |
| C1G056           | Pyruvate dehydrogenase E1 component subunit beta (EC 1.2.4.1)                               | DOWN(8)  | -2,14345 | 0,00371  |
| C1GLX6           | cytochrome c oxidase subunit 4                                                              | DOWN(8)  | -2,06261 | 0,003536 |
| <b>Transport</b> |                                                                                             |          |          |          |
| C1GJS2           | Phosphatidylinositol transfer protein SFH5 (PITP SFH5)                                      | DOWN(D)  | -7,21769 | 1,52E-05 |
| C1GLM2           | voltage-dependent anion channel protein 2                                                   | DOWN(8)  | -6,26569 | 9,37E-05 |
| C1GM08           | GTP-binding protein ypt3                                                                    | DOWN(D)  | -5,74473 | 0,000857 |
| C1GGE1           | Mitochondrial thiamine pyrophosphate carrier 1                                              | DOWN(8)  | -5,40703 | 0,00025  |
| A0A0A0HWM5       | mitochondrial import receptor subunit TOM70                                                 | DOWN(D)  | -5,26458 | 0,000113 |
| C1GID7           | carnitine O-acetyltransferase [EC:2.3.1.7]                                                  | DOWN(D)  | -5,21507 | 7,38E-05 |
| C1GHF6           | Mitochondrial thiamine pyrophosphate carrier 1                                              | DOWN(D)  | -5,13899 | 0,00027  |
| C1GAA6           | Mitochondrial phosphate carrier protein                                                     | DOWN(12) | -4,55762 | 0,007916 |
| C1FZ88           | importin subunit alpha-6/7                                                                  | DOWN(8)  | -4,36192 | 0,003272 |
| C1GMC5           | Mitochondrial thiamine pyrophosphate carrier 1                                              | DOWN(8)  | -4,08467 | 0,000575 |
| C1GLH5           | Mitochondrial GTP/GDP carrier protein 1                                                     | DOWN(8)  | -3,97911 | 0,001008 |
| C1GCH8           | Mitochondrial pyruvate carrier                                                              | DOWN(8)  | -3,67335 | 0,028458 |
| C1GML4           | Mitochondrial thiamine pyrophosphate carrier 1                                              | DOWN(8)  | -3,35598 | 0,024533 |
| C1GAF5           | Coatomer subunit alpha                                                                      | DOWN(8)  | -2,60008 | 0,001756 |

|                              |                                                                                                                                               |          |          |          |
|------------------------------|-----------------------------------------------------------------------------------------------------------------------------------------------|----------|----------|----------|
| C1GHQ7                       | Endoplasmic reticulum transmembrane protein                                                                                                   | DOWN(D)  | -2,33778 | 0,006484 |
| <b>Amino acid metabolism</b> |                                                                                                                                               |          |          |          |
| C1GC81                       | Spermidine synthase                                                                                                                           | DOWN(8)  | -7,07988 | 0,000537 |
| C1GBD8                       | 3-oxoacid CoA-transferase [EC:2.8.3.5]                                                                                                        | DOWN(8)  | -6,39235 | 5,76E-05 |
| C1GCG7                       | Arginine-requiring protein 2                                                                                                                  | DOWN(8)  | -6,15968 | 9,72E-05 |
| C1GBT4                       | 1-pyrroline-5-carboxylate dehydrogenase [EC:1.2.1.88]                                                                                         | DOWN(8)  | -6,07164 | 0,00025  |
| C1GJD3                       | isovaleryl-CoA dehydrogenase [EC:1.3.8.4]                                                                                                     | DOWN(8)  | -5,64098 | 0,00017  |
| C1GC48                       | Branched-chain-amino-acid aminotransferase (EC 2.6.1.42)                                                                                      | DOWN(8)  | -5,58633 | 0,000276 |
| C1G3V5                       | Aspartate aminotransferase (EC 2.6.1.1)                                                                                                       | DOWN(12) | -5,05193 | 7,6E-05  |
| C1GGJ2                       | Ketol-acid reductoisomerase, mitochondrial (EC 1.1.1.86) (Acetohydroxy-acid reductoisomerase) (Alpha-keto-beta-hydroxylacyl reductoisomerase) | DOWN(D)  | -4,20248 | 0,006783 |
| C1G0L5                       | Choline dehydrogenase                                                                                                                         | DOWN(D)  | -4,06077 | 0,000428 |
| C1G1E5                       | hydroxymethylglutaryl-CoA synthase [EC:2.3.3.10]                                                                                              | DOWN(D)  | -3,91866 | 4,87E-05 |
| C1GLQ9                       | Ornithine transcarbamylase                                                                                                                    | DOWN(8)  | -2,62091 | 0,029275 |
| <b>Virulence factors</b>     |                                                                                                                                               |          |          |          |
| C1GKT9                       | Thioredoxin domain-containing protein                                                                                                         | DOWN(8)  | -6,48413 | 3,21E-05 |
| C1GJI6                       | Subtilisin-like serine protease pepC                                                                                                          | DOWN(D)  | -5,95319 | 0,00015  |
| A0A0A0HTP6                   | Alcohol dehydrogenase 1                                                                                                                       | DOWN(D)  | -5,2512  | 3,72E-05 |
| C1GJI2                       | Superoxide dismutase [Cu-Zn]                                                                                                                  | DOWN(D)  | -3,5651  | 0,00071  |
| C1G7K8                       | cytochrome c peroxidase [EC:1.11.1.5]                                                                                                         | DOWN(D)  | -3,10035 | 0,000272 |
| <b>Other metabolisms</b>     |                                                                                                                                               |          |          |          |
| C1GKG3                       | NAD(P)H:quinone oxidoreductase, type IV                                                                                                       | DOWN(8)  | -7,07626 | 9,72E-05 |
| C1GBT0                       | Aldehyde dehydrogenase                                                                                                                        | DOWN(8)  | -7,03539 | 1,18E-05 |
| C1GDE1                       | Serine hydroxymethyltransferase (EC 2.1.2.1)                                                                                                  | DOWN(D)  | -5,7886  | 0,000728 |
| C1G1P0                       | Pribosyltran_N domain-containing protein                                                                                                      | DOWN(8)  | -4,62886 | 0,000217 |
| C1GJM4                       | Vacuolar aminopeptidase I                                                                                                                     | DOWN(D)  | -4,32296 | 0,000825 |
| C1G3H9                       | Aldehyde dehydrogenase                                                                                                                        | DOWN(8)  | -2,97889 | 0,000851 |
| C1GG77                       | Carboxypeptidase Y homolog A (EC 3.4.16.5)                                                                                                    | DOWN(D)  | -2,92665 | 0,00822  |
| C1GJT8                       | Nucleoside diphosphate kinase (EC 2.7.4.6)                                                                                                    | DOWN(D)  | -2,46476 | 0,013929 |
| C1GHN0                       | Mitochondrial-processing peptidase subunit beta                                                                                               | DOWN(D)  | -1,70344 | 0,000409 |
| <b>Cytoskeleton</b>          |                                                                                                                                               |          |          |          |
| C1G6U5                       | Tubulin beta chain                                                                                                                            | DOWN(D)  | -6,03394 | 0,000478 |
| A0A0A0HRG7                   | Actin                                                                                                                                         | DOWN(D)  | -5,72342 | 3,37E-05 |

|                            |                                                             |         |          |          |
|----------------------------|-------------------------------------------------------------|---------|----------|----------|
| C1FZT8                     | tubulin alpha                                               | DOWN(D) | -2,70129 | 0,001761 |
| A0A0A0HWK8                 | Actin                                                       | DOWN(D) | -2,07246 | 0,004465 |
| <b>Cell cycle</b>          |                                                             |         |          |          |
| C1GB68                     | HIT domain-containing protein                               | DOWN(8) | -7,89176 | 3,21E-05 |
| C1G4I1                     | Cell division cycle 20-like protein 1, cofactor-APC complex | DOWN(D) | -7,09341 | 1,16E-05 |
| C1GCT8                     | GTP-binding nuclear protein Ran                             | DOWN(D) | -5,57243 | 5,03E-06 |
| <b>Signal transduction</b> |                                                             |         |          |          |
| C1G501                     | Calmodulin                                                  | DOWN(8) | -5,68868 | 0,002507 |
| <b>No annotation found</b> |                                                             |         |          |          |
| C1G2H2                     | Uncharacterized protein                                     | DOWN(8) | -7,51093 | 0,000276 |
| C1G6F9                     | Uncharacterized protein                                     | DOWN(D) | -7,28525 | 4,24E-05 |
| C1G486                     | Uncharacterized protein                                     | DOWN(8) | -4,86583 | 0,000537 |
| C1GFJ7                     | Uncharacterized protein                                     | DOWN(8) | -4,80627 | 0,000731 |
| C1G0Q6                     | NMO domain-containing protein                               | DOWN(D) | -4,00433 | 0,000768 |
| C1G3V2                     | Uncharacterized protein                                     | DOWN(8) | -3,42439 | 0,000831 |
