# Supplementary material for: Transcriptional profiling of a fungal granuloma reveals a low metabolic activity of Paracoccidioides brasiliensis yeasts and an actively regulated host immune response
Source: PubMed Central journal article supplement (PMC10585178; doi:10.3389/fcimb.2023.1268959), 2023-10-05
Supplement: Table_10.pdf [file Table_10.pdf]

**Supplementary Table 10. Yeast proteins absent in the infection.**

| Accession number               | Protein                                                    |
|--------------------------------|------------------------------------------------------------|
| <b>Gene/protein regulation</b> |                                                            |
| A0A0A0HQI3                     | Nucleoporin NDC1                                           |
| A0A0A0HQN9                     | 40S ribosomal protein S19                                  |
| A0A0A0HR72                     | Sorting nexin-41                                           |
| A0A0A0HSI5                     | UBA domain-containing protein                              |
| A0A0A0HSJ2                     | Nuclear pore complex component-domain-containing protein   |
| A0A0A0HSS2                     | DNA polymerase epsilon subunit Dpb3                        |
| A0A0A0HT52                     | GTP cyclohydrolase                                         |
| A0A0A0HTI2                     | VWFA domain-containing protein                             |
| A0A0A0HTN8                     | Acyl-protein thioesterase                                  |
| A0A0A0HTQ5                     | Protein-serine/threonine kinase                            |
| A0A0A0HTY8                     | nucleolar protein 58                                       |
| A0A0A0HU09                     | Poly(RC)-binding protein                                   |
| A0A0A0HU55                     | Splicing factor 3A subunit 3                               |
| A0A0A0HUA0                     | Ubiquitin interaction motif protein                        |
| A0A0A0HUF3                     | U6 snRNA-associated Sm-like protein LSM3                   |
| A0A0A0HUI8                     | Histone H2A.Z                                              |
| A0A0A0HUJ5                     | large subunit ribosomal protein L3e                        |
| A0A0A0HUV5                     | DNA helicase                                               |
| A0A0A0HV09                     | ATP-dependent RNA helicase eIF4A                           |
| A0A0A0HV62                     | Ribosomal protein L19                                      |
| A0A0A0HV65                     | Ubiquitin-conjugating enzyme variant MMS2                  |
| A0A0A0HV97                     | Transcription initiation factor TFIID/TFIIF subunit        |
| A0A0A0HVN3                     | ATP-dependent RNA helicase DDX5/DBP2 [EC:3.6.4.13]         |
| A0A0A0HW16                     | DNA-directed RNA polymerase II 138 kDa polypeptide         |
| A0A0A0HWB1                     | E3 ubiquitin-protein ligase                                |
| A0A0A0HX32                     | mRNA decapping complex subunit Dcp2                        |
| A0A0A0HX33                     | actin-related protein 8                                    |
| A0A0A0HYT2                     | Signal recognition particle subunit SRP72                  |
| A0A0A0HZA1                     | Exonuclease domain-containing protein                      |
| C1FYE5                         | glutamyl-tRNA synthetase [EC:6.1.1.17]                     |
| C1FYE8                         | HABP4_PAI-RBP1 domain-containing protein                   |
| C1FYH2                         | DNA-directed RNA polymerases I, II, and III subunit RPABC1 |
| C1FYI5                         | U4/U6 small nuclear ribonucleoprotein PRP3                 |
| C1FYJ6;C1GIP8                  | Histone H4                                                 |
| C1FYP9                         | PARP-type domain-containing protein                        |
| C1FYQ2                         | T-complex protein 1 subunit gamma                          |
| C1FYQ6                         | protein TIF31                                              |
| C1FYR6                         | 40S ribosomal protein S7                                   |
| C1FZ00                         | large subunit ribosomal protein L37Ae                      |
| C1FZ06                         | NA                                                         |
| C1FZ53                         | Translation initiation factor 4B                           |
| C1FZ57                         | large subunit ribosomal protein L32e                       |
| C1FZ84                         | Translocon-associated protein                              |

|        |                                                              |
|--------|--------------------------------------------------------------|
| C1FZC5 | RNA_pol_L_2 domain-containing protein                        |
| C1FZD4 | Eukaryotic translation initiation factor 3 subunit M         |
| C1FZG1 | Peptidyl-prolyl cis-trans isomerase                          |
| C1FZI7 | Vacuolar protein sorting/targeting protein 10                |
| C1FZK4 | 28 kDa ribonucleoprotein                                     |
| C1FZL0 | T-complex protein 1 subunit delta                            |
| C1FZL1 | 26S proteasome regulatory subunit T1                         |
| C1FZM4 | tRNA (Guanine37-N1)-methyltransferase                        |
| C1FZM7 | Polymerase II polypeptide D                                  |
| C1FZN1 | 26S proteasome regulatory subunit RPN10                      |
| C1FZP0 | Eukaryotic translation initiation factor 3 subunit D         |
| C1G017 | Zuotin                                                       |
| C1G0A3 | Nuclear pore protein                                         |
| C1G0G4 | 40S ribosomal protein S17                                    |
| C1G0Q9 | U1 snRNP-associated protein Usp107                           |
| C1G0S6 | Mitochondrial genome maintenance protein MGM101              |
| C1G109 | Dolichol-phosphate mannosyltransferase subunit 1             |
| C1G128 | General negative regulator of transcription subunit 1        |
| C1G136 | Pre-RNA splicing factor Srp2, variant 2                      |
| C1G162 | Protein arginine N-methyltransferase 1                       |
| C1G172 | large subunit ribosomal protein L27e                         |
| C1G175 | Proteasome subunit alpha type                                |
| C1G179 | Transcription factor atf1                                    |
| C1G1D6 | Rnapii degradation factor def1                               |
| C1G1H8 | histone chaperone ASF1                                       |
| C1G1M5 | ATP-dependent Clp protease ATP-binding subunit ClpB          |
| C1G1N8 | Hypoxia up-regulated 1                                       |
| C1G1R9 | RNase H type-1 domain-containing protein                     |
| C1G231 | ThiF domain-containing protein                               |
| C1G240 | DnaJ domain protein Psi                                      |
| C1G2D0 | Eukaryotic translation initiation factor 3 subunit F         |
| C1G2D4 | Protein phosphatase                                          |
| C1G2F2 | Rhomboid domain-containing protein                           |
| C1G2H3 | mRNA export factor                                           |
| C1G2I0 | mRNA stability protein                                       |
| C1G2I1 | Carboxypeptidase D                                           |
| C1G2S5 | General negative regulator of transcription subunit 2        |
| C1G2V1 | 30S ribosomal protein S17P                                   |
| C1G2Y0 | Methionine aminopeptidase                                    |
| C1G349 | protein disulfide-isomerase [EC:5.3.4.1]                     |
| C1G373 | translation initiation factor 3 subunit C                    |
| C1G390 | phenylalanyl-tRNA synthetase beta chain [EC:6.1.1.20]        |
| C1G391 | small subunit ribosomal protein S3e                          |
| C1G3I3 | ISWI chromatin-remodeling complex ATPase ISW1                |
| C1G3L4 | Guanine nucleotide-binding protein subunit beta-like protein |
| C1G3X6 | Iron-sulfur cluster assembly protein                         |

|        |                                                                               |
|--------|-------------------------------------------------------------------------------|
| C1G3Y0 | RuvB-like helicase                                                            |
| C1G3Y6 | E3 ubiquitin-protein ligase HUWE1                                             |
| C1G3Y8 | 40S ribosomal protein S6                                                      |
| C1G412 | Peptidase S59 domain-containing protein                                       |
| C1G445 | Hsp90 co-chaperone AHA1                                                       |
| C1G481 | Proteasome-activating nucleotidase                                            |
| C1G497 | Chromatin modification-related protein                                        |
| C1G4B4 | Zn(2)-C6 fungal-type domain-containing protein                                |
| C1G4C0 | N-alpha-acetyltransferase 15/16, NatA auxiliary subunit                       |
| C1G4I3 | obg-like ATPase 1                                                             |
| C1G4I4 | Translation machinery-associated protein 20                                   |
| C1G4M6 | Pre-mRNA-processing factor 40                                                 |
| C1G4S4 | Transcription factor iws1                                                     |
| C1G4S9 | Protein SEY1                                                                  |
| C1G4T2 | BZIP domain-containing protein                                                |
| C1G4U9 | Dynamin GTPase                                                                |
| C1G4X6 | Mitochondrial-processing peptidase subunit alpha                              |
| C1G514 | Hsp90 chaperone protein kinase-targeting subunit                              |
| C1G540 | large subunit ribosomal protein L7/L12                                        |
| C1G541 | T-complex protein 1 subunit theta                                             |
| C1G554 | ubiquitin-activating enzyme E1 [EC:6.2.1.45]                                  |
| C1G561 | aminoacyl tRNA synthase complex-interacting multifunctional protein 1         |
| C1G570 | prolyl-tRNA synthetase [EC:6.1.1.15]                                          |
| C1G571 | T-complex protein 1 subunit alpha                                             |
| C1G582 | DnaJ domain-containing protein                                                |
| C1G5E9 | Peptidylprolyl isomerase                                                      |
| C1G5F5 | Histone deacetylase                                                           |
| C1G5J1 | 60S acidic ribosomal protein P2                                               |
| C1G5M9 | valyl-tRNA synthetase [EC:6.1.1.9]                                            |
| C1G5P6 | PWWP domain-containing protein                                                |
| C1G5Q5 | U4/U6 small nuclear ribonucleoprotein PRP4                                    |
| C1G5U7 | Endoplasmic oxidoreductin-1                                                   |
| C1G5V0 | Nucleic acid-binding protein                                                  |
| C1G5V8 | Signal peptidase complex subunit 2                                            |
| C1G5Y3 | Protein phosphatase PP2A regulatory subunit B                                 |
| C1G5Z1 | Transcriptional repressor Sin3p                                               |
| C1G631 | 26S proteasome regulatory subunit T2                                          |
| C1G632 | ubiquitin-conjugating enzyme (huntingtin interacting protein 2) [EC:2.3.2.23] |
| C1G651 | Vacuolar protein sorting-associated protein 17                                |
| C1G675 | Anucleate primary sterigmata protein A                                        |
| C1G686 | translation initiation factor 6                                               |
| C1G696 | Ferrochelatase                                                                |
| C1G6A7 | Decapping enzyme Dcp1                                                         |
| C1G6D0 | Proteasome subunit alpha type                                                 |
| C1G6E7 | 116 kDa U5 small nuclear ribonucleoprotein component                          |

|        |                                                                          |
|--------|--------------------------------------------------------------------------|
| C1G6F6 | heat shock 70kDa protein 1/2/6/8                                         |
| C1G6M3 | Ribosomal protein                                                        |
| C1G6R0 | protein SSD1                                                             |
| C1G6R9 | protein mago nashi                                                       |
| C1G6T3 | 60S ribosomal protein L6                                                 |
| C1G6U0 | ATP-dependent Clp protease ATP-binding subunit ClpB                      |
| C1G6U1 | Elongation factor 1-beta                                                 |
| C1G6W9 | protein LSM14                                                            |
| C1G741 | LsmAD domain-containing protein                                          |
| C1G746 | N-acetyltransferase domain-containing protein                            |
| C1G763 | RNA-binding domain-containing protein                                    |
| C1G7B9 | transcription elongation factor SPT5                                     |
| C1G7C1 | 26S proteasome regulatory subunit N2                                     |
| C1G7F3 | Piwi domain-containing protein                                           |
| C1G7H6 | RNA polymerase II transcription factor B subunit 3                       |
| C1G7J2 | Pre-mRNA-processing factor 39                                            |
| C1G7J3 | RNA helicase                                                             |
| C1G7N7 | Proteasome component PUP2                                                |
| C1G7T3 | Chaperone DnaJ                                                           |
| C1G7X8 | RNA helicase                                                             |
| C1G810 | 40S ribosomal protein S4                                                 |
| C1G820 | 60S ribosomal protein L21-A                                              |
| C1G821 | 40S ribosomal protein S9                                                 |
| C1G892 | DNA-directed RNA polymerase                                              |
| C1G8C2 | Peptide-methionine (R)-S-oxide reductase                                 |
| C1G8E5 | peptide chain release factor subunit 3                                   |
| C1G8K9 | Xaa-Pro aminopeptidase                                                   |
| C1G8Q6 | Tryptophan--tRNA ligase                                                  |
| C1G8T3 | mitochondrial protein import protein ZIM17                               |
| C1G8T6 | CwfJ domain-containing protein                                           |
| C1G8U4 | Proteasome subunit beta                                                  |
| C1G8V3 | tyrosyl-tRNA synthetase [EC:6.1.1.1]                                     |
| C1G8W2 | Mago-bind domain-containing protein                                      |
| C1G8X9 | Peptidylprolyl isomerase                                                 |
| C1G8Y5 | Mitochondrial intermediate peptidase                                     |
| C1G8Z2 | Nuclear pore complex subunit Nup159                                      |
| C1G918 | Transcription factor RfeD                                                |
| C1G945 | large subunit ribosomal protein L30e                                     |
| C1G957 | Dolichyl-diphosphooligosaccharide--protein glycosyltransferase subunit 1 |
| C1G9A3 | Uracil-DNA glycosylase                                                   |
| C1G9A5 | protein disulfide-isomerase A1 [EC:5.3.4.1]                              |
| C1G9D3 | HMG box domain-containing protein                                        |
| C1G9N1 | 20S proteasome subunit beta 6                                            |
| C1G9P6 | PROTEASOME_ALPHA_1 domain-containing protein                             |
| C1G9T0 | translation initiation factor 3 subunit A                                |
| C1G9U4 | 60S acidic ribosomal protein P0                                          |

|        |                                                               |
|--------|---------------------------------------------------------------|
| C1G9U8 | Chaperone DnaJ                                                |
| C1G9X0 | DNA damage checkpoint protein rad24                           |
| C1G9X1 | Eukaryotic translation initiation factor 3 subunit J          |
| C1G9X6 | Probable carboxypeptidase                                     |
| C1G9X9 | large subunit ribosomal protein L36e                          |
| C1G9Z7 | translation initiation factor 2 subunit 3                     |
| C1GA10 | ATP-dependent RNA helicase DDX3X [EC:3.6.4.13]                |
| C1GA39 | mitochondrial presequence protease                            |
| C1GA62 | alpha-mannosidase [EC:3.2.1.24]                               |
| C1GA83 | ATP-dependent Clp protease, protease subunit [EC:3.4.21.92]   |
| C1GA86 | Replication factor C subunit 2                                |
| C1GAC4 | Translation initiation factor 2 subunit beta                  |
| C1GAD6 | Multiprotein-bridging factor 1                                |
| C1GAE8 | 26S proteasome non-ATPase regulatory subunit 8                |
| C1GAF6 | mitochondrial FAD-linked sulfhydryl oxidase [EC:1.8.3.2]      |
| C1GAF7 | Transcriptional regulator                                     |
| C1GAG0 | tRNA (Guanine9-N1)-methyltransferase                          |
| C1GAG5 | translation initiation factor 3 subunit I                     |
| C1GAK2 | Endoribonuclease L-PSP                                        |
| C1GAL5 | Prp8 binding protein                                          |
| C1GAM9 | 40S ribosomal protein S24                                     |
| C1GAP0 | Protein FYV10                                                 |
| C1GAQ4 | DNA-directed RNA polymerase II subunit RPB2 [EC:2.7.7.6]      |
| C1GAT3 | splicing factor U2AF 35 kDa subunit                           |
| C1GB14 | Histone deacetylase                                           |
| C1GB62 | leucyl-tRNA synthetase [EC:6.1.1.4]                           |
| C1GB65 | 40S ribosomal protein S10-A                                   |
| C1GB82 | protein transport protein SEC24                               |
| C1GBA2 | Mitochondrial RNA splicing protein                            |
| C1GBC4 | mannosyl-oligosaccharide alpha-1,2-mannosidase [EC:3.2.1.113] |
| C1GBC8 | WD repeat-containing protein                                  |
| C1GBE8 | Threonine-tRNA ligase                                         |
| C1GBG1 | aspartyl-tRNA synthetase [EC:6.1.1.12]                        |
| C1GBI7 | NEDD8-activating enzyme E1 regulatory subunit                 |
| C1GBL0 | Peptidyl-prolyl cis-trans isomerase                           |
| C1GBL7 | E3 ubiquitin-protein ligase PEP5                              |
| C1GBM4 | large subunit ribosomal protein L26e                          |
| C1GBN3 | RRM domain-containing protein                                 |
| C1GBT6 | RRM domain-containing protein                                 |
| C1GC24 | nucleolar protein 15                                          |
| C1GC90 | Ribonucloprotein                                              |
| C1GCF0 | ATP-dependent RNA helicase SUB2                               |
| C1GCK8 | Nascent polypeptide-associated complex subunit alpha          |
| C1GCS3 | Deubiquitination-protection protein dph1                      |
| C1GCV8 | T-complex protein 1 subunit zeta                              |
| C1GCV9 | Nucleolar protein 58                                          |

|        |                                                           |
|--------|-----------------------------------------------------------|
| C1GCZ3 | UDP-glucose:glycoprotein glucosyltransferase [EC:2.4.1.-] |
| C1GD28 | protein transport protein SEC13                           |
| C1GD93 | Chaperone protein dnaJ 3                                  |
| C1GDH2 | Type 2A phosphatase activator tip41                       |
| C1GDI5 | Endonuclease                                              |
| C1GDP1 | RNA binding protein Jsn1                                  |
| C1GDQ2 | Asparagine--tRNA ligase                                   |
| C1GDR3 | Pre-mRNA-splicing factor cef1                             |
| C1GDR8 | Deoxyhypusine hydroxylase                                 |
| C1GDT4 | DNA topoisomerase 2-associated protein PAT1               |
| C1GE31 | Rho GDP-dissociation inhibitor                            |
| C1GE59 | RNA helicase                                              |
| C1GE74 | 26S proteasome regulatory subunit RPN1                    |
| C1GEA1 | U2 small nuclear ribonucleoprotein B                      |
| C1GEC6 | Alpha-1,2 mannosyltransferase KTR1                        |
| C1GEF6 | SRP9-21 domain-containing protein                         |
| C1GEF7 | Ribonucleoside-diphosphate reductase small chain          |
| C1GEL8 | Cullin-associated NEDD8-dissociated protein               |
| C1GEM3 | Histone acetyltransferase type B subunit 2                |
| C1GEN2 | DnaJ domain-containing protein                            |
| C1GEN5 | large subunit ribosomal protein L4e                       |
| C1GEQ8 | Alpha-1,2 mannosyltransferase KTR1                        |
| C1GET9 | DNA replication licensing factor MCM5                     |
| C1GF01 | E3 ubiquitin ligase complex SCF subunit                   |
| C1GF12 | glycyl-tRNA synthetase [EC:6.1.1.14]                      |
| C1GF13 | Glycyl-tRNA synthetase                                    |
| C1GF57 | nucleosome assembly protein 1-like 1                      |
| C1GF61 | seryl-tRNA synthetase [EC:6.1.1.11]                       |
| C1GF88 | RNA helicase                                              |
| C1GF93 | Protein-L-isoaspartate O-methyltransferase                |
| C1GF97 | Ubiquitin thioesterase OTU1                               |
| C1GFA3 | 60S ribosomal protein L27a                                |
| C1GFE3 | Transcription elongation factor Spt6                      |
| C1GFG5 | Histone H1                                                |
| C1GFH3 | Flap endonuclease 1                                       |
| C1GFI8 | translation initiation factor 2A                          |
| C1GFJ3 | Transcription initiation factor TFIID subunit 12          |
| C1GFQ8 | SURF1-like protein                                        |
| C1GFS4 | Translation machinery-associated protein 22               |
| C1GFU5 | EKC/KEOPS complex subunit BUD32                           |
| C1GFX4 | translation initiation factor 2 subunit 1                 |
| C1GGD8 | Ubiquitin-conjugating enzyme                              |
| C1GGR5 | small subunit ribosomal protein S20e                      |
| C1GGT8 | 40S ribosomal protein S1                                  |
| C1GH39 | TAF4 domain-containing protein                            |
| C1GH47 | tRNA pseudouridine13 synthase                             |

|        |                                                                       |
|--------|-----------------------------------------------------------------------|
| C1GH63 | 40S ribosomal protein S25                                             |
| C1GHE3 | Transcription factor C subunit 7                                      |
| C1GHL1 | DNA-directed RNA polymerase subunit                                   |
| C1GHT1 | Translocation protein sec63                                           |
| C1GHV2 | 40S ribosomal protein S5                                              |
| C1GHW5 | 26S proteasome non-ATPase regulatory subunit 11                       |
| C1GI59 | GYF domain-containing protein                                         |
| C1GIH5 | Replication factor C subunit 1                                        |
| C1GIH8 | Mitochondrial intermembrane space import and assembly protein 40      |
| C1GIL9 | arginyl-tRNA synthetase [EC:6.1.1.19]                                 |
| C1GIQ4 | HMG box domain-containing protein                                     |
| C1GIS6 | U6 snRNA-associated Sm-like protein LSm4                              |
| C1GIV4 | Proteasome subunit alpha type                                         |
| C1GJ49 | RRM domain-containing protein                                         |
| C1GJ94 | tRNA threonylcarbamoyladenosine dehydratase                           |
| C1GJI0 | Probable endonuclease LCL3                                            |
| C1GJJ6 | chloride channel, nucleotide-sensitive, 1A                            |
| C1GJL2 | cysteinyl-tRNA synthetase [EC:6.1.1.16]                               |
| C1GJS9 | UBX domain-containing protein                                         |
| C1GJX2 | Ubiquitinyl hydrolase 1                                               |
| C1GJZ6 | Phenylalanine--tRNA ligase                                            |
| C1GK43 | C2H2-type domain-containing protein                                   |
| C1GK54 | Pre-mRNA-splicing factor ATP-dependent RNA helicase PRP16             |
| C1GK70 | NEDD8-activating enzyme E1 catalytic subunit                          |
| C1GK84 | SAP domain-containing protein                                         |
| C1GK92 | Splicing factor U2AF subunit                                          |
| C1GKA3 | RRM domain-containing protein                                         |
| C1GKF9 | mRNA 3'-end-processing protein yth1                                   |
| C1GKG6 | Protein phosphatase methylesterase 1                                  |
| C1GKL8 | protein transport protein SEC23                                       |
| C1GKM9 | protein disulfide-isomerase A6 [EC:5.3.4.1]                           |
| C1GKR7 | large subunit ribosomal protein L24e                                  |
| C1GKU6 | Peptidyl-prolyl cis-trans isomerase-like 1                            |
| C1GKX0 | Eukaryotic translation initiation factor 4C                           |
| C1GL26 | translation initiation factor 3 subunit B                             |
| C1GL41 | T-complex protein 1 subunit beta                                      |
| C1GL49 | replication factor A1                                                 |
| C1GL60 | Protein MPE1                                                          |
| C1GL98 | polyadenylate-binding protein                                         |
| C1GLA2 | Eukaryotic translation initiation factor 5A                           |
| C1GLA9 | translation initiation factor 5B                                      |
| C1GLB5 | DNA replication licensing factor MCM3                                 |
| C1GLC7 | transcriptional activator HAP5                                        |
| C1GLD3 | FACT complex subunit SPT16                                            |
| C1GLD7 | dolichyl-phosphate-mannose-protein mannosyltransferase [EC:2.4.1.109] |
| C1GLF9 | 26S proteasome regulatory subunit rpn-8                               |

|                              |                                                                                                   |
|------------------------------|---------------------------------------------------------------------------------------------------|
| C1GLI8                       | CCCH zinc finger and RRM domain-containing protein                                                |
| C1GLP2                       | SAP domain-containing protein                                                                     |
| C1GLR4                       | KH domain-containing protein                                                                      |
| C1GLS6                       | Ubiquitin conjugation factor E4 B                                                                 |
| C1GLV0                       | Histone chaperone                                                                                 |
| C1GM02                       | Mitochondrial DNA replication protein YHM2                                                        |
| C1GM32                       | RuvB-like helicase 2                                                                              |
| C1GMI6                       | lysyl-tRNA synthetase, class II [EC:6.1.1.6]                                                      |
| C1GMJ7                       | Heterochromatin protein HP1                                                                       |
| C1GMJ8                       | T-complex protein 1 subunit epsilon                                                               |
| C1GMR5                       | Peroxin-1                                                                                         |
| C1GMU3                       | Peptidylprolyl isomerase                                                                          |
| C1GMV5                       | DnaJ domain protein                                                                               |
| C1GMV8                       | 40S ribosomal protein S2                                                                          |
| C1GMZ9                       | ATPase family AAA domain-containing protein 1-B                                                   |
| C1GN19                       | 40S ribosomal protein S28                                                                         |
| C1GN32                       | RNA binding effector protein Scp160                                                               |
| C1GN40                       | Chromatin assembly factor 1 subunit B                                                             |
| C1GN69                       | Transcription factor BYE1                                                                         |
| <b>Amino acid metabolism</b> |                                                                                                   |
| A0A0A0HQV9                   | Homoserine O-acetyltransferase                                                                    |
| A0A0A0HRQ4                   | glutaryl-CoA dehydrogenase [EC:1.3.8.6]                                                           |
| A0A0A0HS25                   | DAO domain-containing protein                                                                     |
| A0A0A0HTR8                   | omega-amidase [EC:3.5.1.3]                                                                        |
| C1FYE6                       | Glutaminase A                                                                                     |
| C1FZL3                       | dipeptidyl aminopeptidase B [EC:3.4.14.-]                                                         |
| C1G025                       | Aromatic-L-amino-acid decarboxylase                                                               |
| C1G032                       | DAO domain-containing protein                                                                     |
| C1G0F9                       | kynureninase [EC:3.7.1.3]                                                                         |
| C1G0J6                       | Phospho-2-dehydro-3-deoxyheptonate aldolase                                                       |
| C1G140                       | DAO domain-containing protein                                                                     |
| C1G197                       | Arginase                                                                                          |
| C1G297                       | 1-(5-phosphoribosyl)-5-[(5-phosphoribosylamino)methylideneamino]imidazole-4-carboxamide isomerase |
| C1G2Y9                       | Argininosuccinate lyase                                                                           |
| C1G312                       | ornithine--oxo-acid transaminase [EC:2.6.1.13]                                                    |
| C1G388                       | Aspartate aminotransferase                                                                        |
| C1G3B0                       | Galactonate dehydratase                                                                           |
| C1G3G3                       | gamma-glutamyltranspeptidase / glutathione hydrolase [EC:2.3.2.2<br>3.4.19.13]                    |
| C1G3U9                       | Homocitrate synthase                                                                              |
| C1G452                       | saccharopine dehydrogenase (NADP+, L-glutamate forming)<br>[EC:1.5.1.10]                          |
| C1G4C3                       | Anthranilate phosphoribosyltransferase                                                            |
| C1G4J8                       | Kynurenine formamidase                                                                            |
| C1G4R2                       | S-adenosylmethionine synthetase [EC:2.5.1.6]                                                      |
| C1G4U7                       | Glycine cleavage system H protein                                                                 |



|        |                                                                                                                |
|--------|----------------------------------------------------------------------------------------------------------------|
| C1G553 | GST N-terminal domain-containing protein                                                                       |
| C1G596 | 3-hydroxyisobutyrate/3-hydroxypropionate dehydrogenase<br>[EC:1.1.1.31 1.1.1.59]                               |
| C1G5K1 | Cystathionine gamma-lyase                                                                                      |
| C1G5P3 | 3-hydroxyanthranilate 3,4-dioxygenase                                                                          |
| C1G6B4 | Methionine adenosyltransferase 2 subunit beta                                                                  |
| C1G6C1 | Cysteine synthase                                                                                              |
| C1G6H2 | threonine synthase [EC:4.2.3.1]                                                                                |
| C1G6P2 | 2,4-dihydroxyhept-2-ene-1,7-dioic acid aldolase                                                                |
| C1G6V9 | aminomethyltransferase [EC:2.1.2.10]                                                                           |
| C1G765 | Alanine--glyoxylate transaminase                                                                               |
| C1G792 | threonine dehydratase [EC:4.3.1.19]                                                                            |
| C1G7A3 | succinate-semialdehyde dehydrogenase / glutarate-semialdehyde<br>dehydrogenase [EC:1.2.1.16 1.2.1.79 1.2.1.20] |
| C1G7L2 | 3-isopropylmalate dehydratase [EC:4.2.1.33]                                                                    |
| C1G8C8 | 2-oxoisovalerate dehydrogenase E1 component alpha subunit<br>[EC:1.2.4.4]                                      |
| C1G8D6 | S-methyl-5'-thioadenosine phosphorylase                                                                        |
| C1G8P1 | 2-oxoisovalerate dehydrogenase E1 component beta subunit<br>[EC:1.2.4.4]                                       |
| C1G8V0 | aspartate aminotransferase, cytoplasmic [EC:2.6.1.1]                                                           |
| C1G8Z9 | Proline iminopeptidase                                                                                         |
| C1G900 | Tyrosine decarboxylase                                                                                         |
| C1G949 | ATP phosphoribosyltransferase                                                                                  |
| C1GAY3 | proline dehydrogenase [EC:1.5.5.2]                                                                             |
| C1GB53 | anthranilate synthase component I [EC:4.1.3.27]                                                                |
| C1GC00 | Homoserine kinase                                                                                              |
| C1GCG4 | Glutamine synthetase                                                                                           |
| C1GCK1 | Betaine aldehyde dehydrogenase                                                                                 |
| C1GD55 | 5-oxoprolinase (ATP-hydrolysing) [EC:3.5.2.9]                                                                  |
| C1GD67 | Peptidyl-prolyl cis-trans isomerase                                                                            |
| C1GDG5 | cystathionine beta-synthase [EC:4.2.1.22]                                                                      |
| C1GDK1 | Glutamate-5-semialdehyde dehydrogenase                                                                         |
| C1GEZ1 | Arginine biosynthesis bifunctional protein ArgJ, mitochondrial                                                 |
| C1GF60 | Phosphoglycerate dehydrogenase                                                                                 |
| C1GF68 | Dihydrolipoyllysine-residue succinyltransferase                                                                |
| C1GF82 | Cystathionine gamma-synthase                                                                                   |
| C1GF86 | Cys-Gly metallodipeptidase DUG1 [EC:3.4.13.-]                                                                  |
| C1GFM4 | Phosphoserine phosphatase                                                                                      |
| C1GFV8 | Saccharopine dehydrogenase [NAD(+), L-lysine-forming]                                                          |
| C1GG15 | 1,2-dihydroxy-3-keto-5-methylthiopentene dioxygenase                                                           |
| C1GG64 | Imidazoleglycerol-phosphate dehydratase                                                                        |
| C1GG82 | Glutamate decarboxylase                                                                                        |
| C1GGZ4 | Phosphoserine transaminase                                                                                     |
| C1GGZ6 | Homoaconitase, mitochondrial                                                                                   |
| C1GHU8 | 2-isopropylmalate synthase                                                                                     |
| C1GHZ0 | 3-hydroxyisobutyryl-CoA hydrolase [EC:3.1.2.4]                                                                 |

|                          |                                                                                                                                     |
|--------------------------|-------------------------------------------------------------------------------------------------------------------------------------|
| C1GI69                   | tryptophan synthase [EC:4.2.1.20]                                                                                                   |
| C1GIRO                   | Pyrroline-5-carboxylate reductase                                                                                                   |
| C1GJ05                   | dihydroxy-acid dehydratase [EC:4.2.1.9]                                                                                             |
| C1GJ38                   | anthranilate synthase / indole-3-glycerol phosphate synthase / phosphoribosylanthranilate isomerase [EC:4.1.3.27 4.1.1.48 5.3.1.24] |
| C1GJD0                   | 3-methylcrotonyl-CoA carboxylase alpha subunit [EC:6.4.1.4]                                                                         |
| C1GK23                   | Dihydroxy-acid dehydratase                                                                                                          |
| C1GK60                   | Aromatic amino acid aminotransferase                                                                                                |
| C1GL14                   | Phospho-2-dehydro-3-deoxyheptonate aldolase                                                                                         |
| C1GL38                   | Branched-chain amino acid aminotransferase                                                                                          |
| C1GL59                   | Imidazole glycerol phosphate synthase hisHF                                                                                         |
| C1GLF6                   | L-2-aminoadipate reductase [EC:1.2.1.95]                                                                                            |
| C1GLK1                   | Aconitate hydratase, mitochondrial                                                                                                  |
| C1GLM1                   | asparagine synthase (glutamine-hydrolysing) [EC:6.3.5.4]                                                                            |
| C1GLR3                   | Acetohydroxy-acid synthase small subunit                                                                                            |
| C1GLY5                   | Aspartate-semialdehyde dehydrogenase                                                                                                |
| C1GMH9                   | Fumarylacetoacetase                                                                                                                 |
| C1GMI0                   | Homogentisate 1,2-dioxygenase                                                                                                       |
| C1GMI2                   | 4-hydroxyphenylpyruvate dioxygenase [EC:1.13.11.27]                                                                                 |
| C1GN02                   | Cystathionine beta-lyase                                                                                                            |
| C1GN18                   | ATP phosphoribosyltransferase                                                                                                       |
| <b>Energy metabolism</b> |                                                                                                                                     |
| A0A0A0HRM2               | V-type H <sup>+</sup> -transporting ATPase subunit A [EC:7.1.2.2]                                                                   |
| A0A0A0HUI2               | NADH dehydrogenase [ubiquinone] 1 alpha subcomplex assembly factor 3                                                                |
| A0A0A0HVE7               | NADH-ubiquinone oxidoreductase                                                                                                      |
| A0A0A0HVK7               | NADPH--cytochrome P450 reductase                                                                                                    |
| A0A0A0HVL2               | Long-chain-fatty-acid-CoA ligase                                                                                                    |
| A0A0A0HWQ9               | NADH-ubiquinone oxidoreductase 78 kDa subunit, mitochondria                                                                         |
| A0A0A0HX82               | phosphoglucomutase [EC:5.4.2.2]                                                                                                     |
| C1FYU2                   | Mitochondrial protein Fmp25                                                                                                         |
| C1FYW8                   | chitinase [EC:3.2.1.14]                                                                                                             |
| C1FZ35                   | Cyanate hydratase                                                                                                                   |
| C1FZV1                   | ribulose-phosphate 3-epimerase [EC:5.1.3.1]                                                                                         |
| C1G002                   | 6-phosphofructokinase 1 [EC:2.7.1.11]                                                                                               |
| C1G0R1                   | Glucose-6-phosphate isomerase                                                                                                       |
| C1G0V2                   | NADH-ubiquinone oxidoreductase kD subunit                                                                                           |
| C1G137                   | electron-transferring-flavoprotein dehydrogenase [EC:1.5.5.1]                                                                       |
| C1G1H4                   | pyruvate decarboxylase [EC:4.1.1.1]                                                                                                 |
| C1G1T5                   | Glutamate synthase (NADH)                                                                                                           |
| C1G256                   | NADH dehydrogenase [ubiquinone] 1 alpha subcomplex subunit                                                                          |
| C1G278                   | acyl-CoA dehydrogenase [EC:1.3.8.7]                                                                                                 |
| C1G350                   | NADH dehydrogenase (Ubiquinone) 1 alpha subcomplex 5                                                                                |
| C1G3P1                   | Ubiquinone biosynthesis monooxygenase COQ6, mitochondrial                                                                           |
| C1G437                   | V-type proton ATPase subunit a                                                                                                      |
| C1G440                   | fructose-1,6-bisphosphatase I [EC:3.1.3.11]                                                                                         |
| C1G496                   | Oxoglutarate dehydrogenase (succinyl-transferring)                                                                                  |

|                   |                                                                           |
|-------------------|---------------------------------------------------------------------------|
| C1G4R7            | V-type proton ATPase subunit H                                            |
| C1G5C9            | NADH dehydrogenase [ubiquinone] 1 beta subcomplex subunit 7               |
| C1G5Z3            | Beta-glucosidase                                                          |
| C1G658            | Homoserine O-acetyltransferase                                            |
| C1G6C3            | sulfite oxidase [EC:1.8.3.1]                                              |
| C1G6E6            | acetyl-CoA C-acetyltransferase [EC:2.3.1.9]                               |
| C1G6V7            | V-type proton ATPase subunit C                                            |
| C1G794            | Respiratory supercomplex factor 1, mitochondrial                          |
| C1G7G3            | Glucose-6-phosphate 1-epimerase                                           |
| C1G7N9            | acetyl-CoA acyltransferase 1 [EC:2.3.1.16]                                |
| C1G890            | sulfite reductase (NADPH) hemoprotein beta-component [EC:1.8.1.2]         |
| C1G8D0            | NADH-ubiquinone oxidoreductase 30.4 kDa subunit, mitochondrial            |
| C1G8L6            | Cytochrome b5 heme-binding domain-containing protein                      |
| C1G8R5            | 6-phosphogluconate dehydrogenase [EC:1.1.1.44 1.1.1.343]                  |
| C1G950            | NADH-ubiquinone oxidoreductase 24 kDa subunit                             |
| C1G977            | Hexokinase                                                                |
| C1G9B6            | Nfu_N domain-containing protein                                           |
| C1GA79            | Pyruvate dehydrogenase complex component Pdx1                             |
| C1GA89            | inorganic pyrophosphatase [EC:3.6.1.1]                                    |
| C1GAJ0            | ATP synthase mitochondrial F1 complex assembly factor 2                   |
| C1GAJ4            | Quinone oxidoreductase                                                    |
| C1GB77            | NADH-ubiquinone oxidoreductase 40 kDa subunit, mitochondrial              |
| C1GBI8            | Ribose-5-phosphate isomerase                                              |
| C1GBX3            | oxalate---CoA ligase [EC:6.2.1.8]                                         |
| C1GC37            | Cytochrome b5 heme-binding domain-containing protein                      |
| C1GCK7            | ATP synthase subunit d, mitochondrial                                     |
| C1GCW1            | Cytochrome c oxidase assembly protein COX20, mitochondrial                |
| C1GCX3            | 2,3-bisphosphoglycerate-independent phosphoglycerate mutase [EC:5.4.2.12] |
| C1GDJ9            | Iron sulfur cluster assembly protein 1, mitochondrial                     |
| C1GF69            | NADH dehydrogenase [ubiquinone] 1 beta subcomplex subunit 9               |
| C1GFQ2            | Ubiquinone biosynthesis protein COQ4, mitochondrial                       |
| C1GGI8            | Delta(3,5)-Delta(2,4)-dienoyl-CoA isomerase                               |
| C1GHV7            | V-type proton ATPase subunit                                              |
| C1GI20            | triosephosphate isomerase (TIM) [EC:5.3.1.1]                              |
| C1GI70            | Vacuolar proton pump subunit B                                            |
| C1GIJ5            | Probable electron transfer flavoprotein subunit alpha                     |
| C1GJQ8            | 2Fe-2S ferredoxin-type domain-containing protein                          |
| C1GK68            | NADH-ubiquinone oxidoreductase 49 kDa subunit, mitochondrial              |
| C1GKM7            | ATP synthase subunit gamma                                                |
| C1GKQ0            | Pyruvate decarboxylase                                                    |
| C1GKV7            | Vacuolar ATP synthase subunit E                                           |
| C1GL06            | Succinate dehydrogenase [ubiquinone] iron-sulfur subunit, mitochondrial   |
| C1GL12            | Glycogen debranching enzyme                                               |
| C1GLI3            | fumarate hydratase, class II [EC:4.2.1.2]                                 |
| C1GLP3;A0A0A0HSX1 | Cytochrome b2                                                             |

|                   |                                                               |
|-------------------|---------------------------------------------------------------|
| C1GMD0            | NADH dehydrogenase (ubiquinone) Fe-S protein 8 [EC:7.1.1.2]   |
| Q1XAA6            | NADH-ubiquinone oxidoreductase chain 5                        |
| <b>Cell cycle</b> |                                                               |
| A0A0A0HUN4        | Mitotic checkpoint protein BUB3                               |
| A0A0A0HWU6        | Tubulin gamma chain                                           |
| C1FZX8            | Protein kinase dsk1                                           |
| C1G389            | serine/threonine-protein phosphatase 2A regulatory subunit A  |
| C1G402            | Cell division control protein Cdc31                           |
| C1G681            | Reduced viability upon starvation protein                     |
| C1G6F8            | Cyclin-dependent kinases regulatory subunit                   |
| C1G6J0            | Protein stu1                                                  |
| C1G788            | Restriction of telomere capping protein 5                     |
| C1G7B8            | Nuclear movement protein nudC                                 |
| C1G7R4            | Myosin regulatory light chain cdc4                            |
| C1G857            | Cohesin complex subunit SA-1/2                                |
| C1G861            | Rab-GAP TBC domain-containing protein                         |
| C1G8I3            | Autophagy-related protein 13                                  |
| C1G994            | ANAPC4_WD40 domain-containing protein                         |
| C1GBL1            | Zinc finger protein zpr1                                      |
| C1GCC3            | Serine/threonine-protein kinase sid2                          |
| C1GCN4            | Pheromone-dependent cell cycle arrest protein Far11           |
| C1GEM8            | cell division control protein 12                              |
| C1GEQ3            | NAP family protein                                            |
| C1GFC0            | Anucleate primary sterigmata protein ApsB                     |
| C1GG95            | Pro-apoptotic serine protease NMA111                          |
| C1GIL6            | Structural maintenance of chromosomes protein                 |
| C1GJ83            | cell division control protein 11                              |
| C1GL30            | Velvet domain-containing protein                              |
| C1GLF0            | Centromere protein C                                          |
| C1GMD9            | Protein SDS23                                                 |
| <b>Transport</b>  |                                                               |
| A0A0A0HT88        | Long-chain fatty acid transporter                             |
| A0A0A0HUB3        | Oxysterol binding protein (Osh1)                              |
| A0A0A0HVG2        | Importin N-terminal domain-containing protein                 |
| A0A0A0HVN6        | Microtubule binding protein HOOK3                             |
| A0A0A0HWB7        | Mitochondrial import inner membrane translocase subunit tim23 |
| A0A0A0HWS3        | vacuolar protein sorting-associated protein 1                 |
| A0A0A0HWW6        | K(+)/H(+) antiporter 1                                        |
| A0A0A0HXV1        | AP complex subunit beta                                       |
| C1FYF2            | Peroxin-19                                                    |
| C1FYK9            | MHD domain-containing protein                                 |
| C1FYP6            | Bud site selection protein                                    |
| C1FYZ4            | Mitochondrial thiamine pyrophosphate carrier 1                |
| C1FZ16            | 60S ribosomal export protein NMD3                             |
| C1FZH1            | Actin binding protein                                         |
| C1FZH6            | dynamamin 1-like protein [EC:3.6.5.5]                         |

|        |                                                                         |
|--------|-------------------------------------------------------------------------|
| C1FZK1 | Ran GTPase-activating protein                                           |
| C1FZY5 | Plasma membrane channel protein                                         |
| C1G0A9 | Calcium/proton exchanger                                                |
| C1G0N4 | Importin N-terminal domain-containing protein                           |
| C1G112 | Vacuolar protein sorting-associated protein 35                          |
| C1G1C6 | DUF221 domain-containing protein                                        |
| C1G1D9 | MFS domain-containing protein                                           |
| C1G1M0 | Autophagy-related protein 27                                            |
| C1G207 | MFS domain-containing protein                                           |
| C1G226 | Autophagy-related protein 3                                             |
| C1G2M5 | Nuclear protein export protein Yrb2                                     |
| C1G2Y7 | ABC transporter domain-containing protein                               |
| C1G351 | Coatomer subunit beta                                                   |
| C1G3G2 | Mitochondrial import inner membrane translocase subunit tim14           |
| C1G3N9 | Sorting nexin-4                                                         |
| C1G3Q1 | Sorting nexin 3                                                         |
| C1G3T6 | P-type Na <sup>+</sup> /K <sup>+</sup> transporter [EC:7.2.2.3 7.2.2.-] |
| C1G4F7 | Mitochondrial thiamine pyrophosphate carrier 1                          |
| C1G4I7 | Mitochondrial inner membrane translocase subunit TIM44                  |
| C1G4R8 | M protein repeat protein                                                |
| C1G584 | AA_permease domain-containing protein                                   |
| C1G5H2 | Probable lysosomal cobalamin transporter                                |
| C1G5L4 | dynein cytoplasmic 1 intermediate chain                                 |
| C1G635 | ATP-binding cassette, subfamily F, member 2                             |
| C1G6S0 | Coatomer subunit beta                                                   |
| C1G6Y4 | carnitine O-acetyltransferase [EC:2.3.1.7]                              |
| C1G764 | Vacuolar protein sorting-associated protein 29                          |
| C1G784 | MICOS complex subunit MIC60                                             |
| C1G7G9 | MFS transporter, SP family, sugar:H <sup>+</sup> symporter              |
| C1G7U5 | ATP-dependent permease PDR12                                            |
| C1G7W6 | MFS domain-containing protein                                           |
| C1G812 | Sorting nexin-3                                                         |
| C1G8F9 | SSD domain-containing protein                                           |
| C1G8G0 | importin-4                                                              |
| C1G8H8 | Vacuolar protein sorting-associated protein 27                          |
| C1G8S5 | AA_permease domain-containing protein                                   |
| C1G9E6 | mitochondrial import inner membrane translocase subunit TIM10           |
| C1G9U1 | COPII-coated vesicle component Erv46                                    |
| C1G9W2 | Small COPII coat GTPase SAR1                                            |
| C1G9W9 | Calcium-transporting ATPase                                             |
| C1GAU7 | Transmembrane protein                                                   |
| C1GB16 | mitochondrial import inner membrane translocase subunit TIM50           |
| C1GBG4 | coatomer subunit gamma                                                  |
| C1GBP4 | MFS domain-containing protein                                           |
| C1GCX1 | Vesicle-fusing ATPase                                                   |
| C1GDK3 | Mitochondrial thiamine pyrophosphate carrier 1                          |

|                         |                                                                                      |
|-------------------------|--------------------------------------------------------------------------------------|
| C1GE21                  | DUF1681 domain-containing protein                                                    |
| C1GE52                  | actin-related protein 3                                                              |
| C1GE93                  | Solute carrier family 25 (Mitochondrial S-adenosylmethionine transporter), member 26 |
| C1GER2                  | MFS domain-containing protein                                                        |
| C1GEX3                  | ATP-binding cassette, subfamily C (CFTR/MRP), member 1 [EC:7.6.2.3]                  |
| C1GF89                  | Mitochondrial thiamine pyrophosphate carrier 1                                       |
| C1GG11                  | Vacuolar protein sorting-associated protein                                          |
| C1GGB5                  | Calcium-binding protein NCS-1                                                        |
| C1GGB6                  | Transmembrane 9 superfamily member                                                   |
| C1GGE8                  | Kinesin-like protein                                                                 |
| C1GGX1                  | ABC transporter domain-containing protein                                            |
| C1GGX4                  | DUF410 domain-containing protein                                                     |
| C1GH26                  | FYVE-type domain-containing protein                                                  |
| C1GHB9                  | Coatomer subunit delta                                                               |
| C1GHD6                  | Potassium/sodium efflux P-type ATPase, fungal-type                                   |
| C1GHE5                  | importin subunit beta-1                                                              |
| C1GHP1                  | Protein CASP                                                                         |
| C1GHP2                  | CNH domain-containing protein                                                        |
| C1GI05                  | Probable vacuolar protein sorting-associated protein 16 homolog                      |
| C1GI19                  | Vacuolar protein 8                                                                   |
| C1GIA8                  | Mitochondrial dicarboxylate transporter                                              |
| C1GIB2                  | protein transport protein SEC31                                                      |
| C1GIX9                  | SEC7 domain-containing protein                                                       |
| C1GJH7                  | ER membrane protein complex subunit 1                                                |
| C1GJN2                  | AP-1 complex subunit mu                                                              |
| C1GJQ7                  | Mitochondrial fusion protein                                                         |
| C1GK04                  | ENTH domain-containing protein                                                       |
| C1GK73                  | t-SNARE coiled-coil homology domain-containing protein                               |
| C1GKA9                  | Mitochondrial thiamine pyrophosphate carrier 1                                       |
| C1GLH9                  | V-SNARE                                                                              |
| C1GLJ9                  | Importin N-terminal domain-containing protein                                        |
| C1GLP7                  | t-SNARE coiled-coil homology domain-containing protein                               |
| C1GLV2                  | solute carrier family 25 (peroxisomal adenine nucleotide transporter), member 17     |
| C1GM90                  | Phosphatidylinositol-phosphatidylcholine transfer protein                            |
| C1GMA2                  | Vacuolar-sorting protein snf7                                                        |
| C1GMS5                  | Thiosulfate sulfurtransferase                                                        |
| C1GMU5                  | t-SNARE coiled-coil homology domain-containing protein                               |
| C1GN84                  | FAD-binding FR-type domain-containing protein                                        |
| <b>Lipid metabolism</b> |                                                                                      |
| C1FZU0                  | Sterol esterase                                                                      |
| C1G064                  | fatty acid synthase subunit alpha, fungi type [EC:2.3.1.86]                          |
| C1G065                  | Fatty acid synthase beta subunit dehydratase                                         |
| C1G0P4                  | long-chain acyl-CoA synthetase [EC:6.2.1.3]                                          |
| C1G106                  | 3-oxoacyl-[acyl-carrier protein] reductase                                           |
| C1G239                  | Protein PBN1                                                                         |

|                          |                                                                                                     |
|--------------------------|-----------------------------------------------------------------------------------------------------|
| C1G2R7                   | acyl-coenzyme A thioesterase 13 [EC:3.1.2.-]                                                        |
| C1G4Q3                   | Glycerol 3-phosphatase 1                                                                            |
| C1G699                   | Squalene monooxygenase                                                                              |
| C1G6W7                   | 4HBT domain-containing protein                                                                      |
| C1G873                   | Sphingosine-1-phosphate phosphohydrolase                                                            |
| C1G9R2                   | Diacylglycerol O-acyltransferase                                                                    |
| C1G9R7                   | Cytochrome P450 51                                                                                  |
| C1G9V7                   | Patatin-like phospholipase domain-containing protein                                                |
| C1GBJ3                   | ATP citrate synthase                                                                                |
| C1GC21                   | sterol carrier protein 2 [EC:2.3.1.176]                                                             |
| C1GCQ2                   | 3,2-trans-enoyl-CoA isomerase, Delta(2)-enoyl-CoA isomerase                                         |
| C1GCZ4                   | Long-chain specific acyl-CoA dehydrogenase                                                          |
| C1GD48                   | ethanolamine-phosphate cytidyltransferase [EC:2.7.7.14]                                             |
| C1GDE5                   | propionyl-CoA synthetase [EC:6.2.1.17]                                                              |
| C1GDH4                   | leukotriene-A4 hydrolase [EC:3.3.2.6]                                                               |
| C1GDJ1                   | acetyl-CoA carboxylase / biotin carboxylase 1 [EC:6.4.1.2 6.3.4.14 2.1.3.15]                        |
| C1GDN1                   | Beta-ketoacyl-acyl-carrier-protein synthase II                                                      |
| C1GFX9                   | Glycolipid transferprotein HET-C2                                                                   |
| C1GGA8                   | Long-chain-fatty-acid-CoA ligase                                                                    |
| C1GKG2                   | 17beta-estradiol 17-dehydrogenase / very-long-chain 3-oxoacyl-CoA reductase [EC:1.1.1.62 1.1.1.330] |
| C1GLB2                   | C-22 sterol desaturase                                                                              |
| <b>Virulence factors</b> |                                                                                                     |
| A0A0A0HR13               | Alcohol dehydrogenase                                                                               |
| C1G3N5                   | Thioredoxin reductase                                                                               |
| C1G450                   | Alcohol dehydrogenase zinc-binding domain-containing protein                                        |
| C1G489                   | superoxide dismutase, Fe-Mn family [EC:1.15.1.1]                                                    |
| C1G4T8                   | Superoxide dismutase                                                                                |
| C1G7E0                   | Thioredoxin domain-containing protein                                                               |
| C1GAY0                   | Cell wall glucanase (Utr2)                                                                          |
| C1GBB1                   | Peroxiredoxin 5, atypical 2-Cys peroxiredoxin                                                       |
| C1GBS5                   | 1,3-beta-glucanosyltransferase                                                                      |
| C1GDK8                   | Thioredoxin domain-containing protein                                                               |
| C1GE18                   | Thioredoxin                                                                                         |
| C1GE86                   | Survival factor 1                                                                                   |
| <b>Other metabolisms</b> |                                                                                                     |
| A0A0A0HQV2               | NAD(P)H-hydrate epimerase [EC:5.1.99.6]                                                             |
| A0A0A0HRF1               | Hydroxyacylglutathione hydrolase                                                                    |
| A0A0A0HTY3               | 1,4-alpha-glucan branching enzyme [EC:2.4.1.18]                                                     |
| A0A0A0HU84               | Terpenoid synthase                                                                                  |
| A0A0A0HUK5               | Pyruvate decarboxylase                                                                              |
| A0A0A0HUQ2               | AB hydrolase-1 domain-containing protein                                                            |
| A0A0A0HV38               | Cysteine desulfurase                                                                                |
| A0A0A0HV89               | Alkaline phosphatase                                                                                |
| A0A0A0HWR3               | phosphoribosylformylglycinamide synthase [EC:6.3.5.3]                                               |
| A0A0A0HXV8               | Glycolate oxidase, subunit GlcD                                                                     |

|            |                                                                  |
|------------|------------------------------------------------------------------|
| A0A0A0HYM8 | Ribose-phosphate diphosphokinase                                 |
| A0A0A0HYZ8 | Guanylate kinase                                                 |
| C1FYK8     | cyclin-dependent kinase [EC:2.7.11.22]                           |
| C1FYN6     | UDP-galactopyranose mutase                                       |
| C1FYX3     | CAP20 protein                                                    |
| C1FYZ9     | Saccharopine dehydrogenase                                       |
| C1FZ38     | Phospholipase                                                    |
| C1FZ45     | GST N-terminal domain-containing protein                         |
| C1FZ74     | Uracil phosphoribosyltransferase                                 |
| C1FZC4     | 2-nitropropane dioxygenase                                       |
| C1FZD3     | Uridylate kinase                                                 |
| C1FZD8     | Trehalose 6-phosphate synthase                                   |
| C1FZS1     | Fe2OG dioxygenase domain-containing protein                      |
| C1G019     | Guanine deaminase                                                |
| C1G022     | Hydantoinase                                                     |
| C1G072     | Inositol-1-monophosphatase                                       |
| C1G0D2     | Xanthine phosphoribosyltransferase 1                             |
| C1G0E1     | urate oxidase [EC:1.7.3.3]                                       |
| C1G0H6     | NAD dependent epimerase/dehydratase family protein               |
| C1G0Q2     | ADP-ribosylation factor GTPase-activating protein 2/3            |
| C1G0Q3     | Dihydropteroate synthase                                         |
| C1G0T1     | Glycogenin glucosyltransferase                                   |
| C1G0V6     | Protoglobin domain-containing protein                            |
| C1G0X0     | Vacuolar membrane protease                                       |
| C1G0X3     | 2-succinylbenzoate-CoA ligase                                    |
| C1G0Y9     | Glutaredoxin                                                     |
| C1G161     | Peroxisomal dehydratase                                          |
| C1G164     | phosphoacetylglucosamine mutase [EC:5.4.2.3]                     |
| C1G168     | succinate---hydroxymethylglutarate CoA-transferase [EC:2.8.3.13] |
| C1G1A3     | Mitochondrial methylglutaconyl-CoA hydratase                     |
| C1G1F4     | Ankyrin repeat protein                                           |
| C1G1J5     | Lactam utilization protein lamB                                  |
| C1G1W6     | Mannose-6-phosphate isomerase                                    |
| C1G1X9     | Alpha-1,4 glucan phosphorylase                                   |
| C1G208     | Geranylgeranyl pyrophosphate synthase                            |
| C1G215     | Phosphoglycolate phosphatase                                     |
| C1G217     | Nudix hydrolase domain-containing protein                        |
| C1G245     | Sugar phosphate phosphatase                                      |
| C1G246     | Serine/threonine-protein phosphatase                             |
| C1G2D3     | Choline-phosphate cytidyltransferase                             |
| C1G2L8     | Delta-aminolevulinic acid dehydratase                            |
| C1G2Z8     | Pyridoxal phosphate homeostasis protein                          |
| C1G343     | Dihydroorotate dehydrogenase                                     |
| C1G347     | ACB domain-containing protein                                    |
| C1G356     | Mannitol-1-phosphate 5-dehydrogenase                             |
| C1G3A8     | Inosine-uridine preferring nucleoside hydrolase                  |



|        |                                                               |
|--------|---------------------------------------------------------------|
| C1G3H0 | Short chain dehydrogenase/reductase family                    |
| C1G3K3 | NADPH dehydrogenase                                           |
| C1G3N0 | Citrate lyase subunit beta                                    |
| C1G3V6 | L-tyrosine decarboxylase                                      |
| C1G3Z9 | Kynurenine-oxoglutarate transaminase                          |
| C1G479 | Mannose-1-phosphate guanyltransferase                         |
| C1G4I6 | Protein phosphatase                                           |
| C1G4W6 | NADH dehydrogenase                                            |
| C1G534 | Epimerase domain-containing protein                           |
| C1G5D0 | Glutamate--cysteine ligase                                    |
| C1G5D2 | Striatin Pro11                                                |
| C1G5H5 | Bromo domain-containing protein                               |
| C1G5I8 | carbamoyl-phosphate synthase large subunit [EC:6.3.5.5]       |
| C1G5J3 | ATP-dependent (S)-NAD(P)H-hydrate dehydratase                 |
| C1G5L8 | Pirin                                                         |
| C1G5P1 | NAK protein kinase                                            |
| C1G5S1 | Glutathione S-transferase kappa                               |
| C1G5Z2 | acetyl-CoA hydrolase [EC:3.1.2.1]                             |
| C1G620 | 4-coumarate-CoA ligase                                        |
| C1G624 | GTPase-activating protein GYP2                                |
| C1G653 | Nucleoside-diphosphate-sugar epimerase                        |
| C1G6D2 | Inositol polyphosphate phosphatase                            |
| C1G6D9 | Secondary thiamine-phosphate synthase enzyme                  |
| C1G6V8 | Adenylyl-sulfate kinase                                       |
| C1G713 | H+-translocating NAD(P) transhydrogenase [EC:1.6.1.2 7.1.1.1] |
| C1G7E4 | Aldehyde dehydrogenase                                        |
| C1G7R6 | metallopeptidase MepB [EC:3.4.24.-]                           |
| C1G7T9 | 5'-deoxynucleotidase                                          |
| C1G7X1 | S-(hydroxymethyl)glutathione dehydrogenase                    |
| C1G855 | Acetyl-coenzyme A transporter 1                               |
| C1G898 | Aldehyde dehydrogenase                                        |
| C1G8E0 | M protein repeat protein                                      |
| C1G8F8 | Ser/Thr protein phosphatase                                   |
| C1G8J4 | Beta-lactamase domain-containing protein                      |
| C1G8V5 | Glycosidase                                                   |
| C1G8V9 | Beta-hexosaminidase                                           |
| C1G8X2 | Thiamine thiazole synthase                                    |
| C1G9D5 | urease [EC:3.5.1.5]                                           |
| C1G9D6 | cytochrome-b5 reductase [EC:1.6.2.2]                          |
| C1G9K7 | phosphomannomutase [EC:5.4.2.8]                               |
| C1G9L3 | Orotate phosphoribosyltransferase                             |
| C1G9M7 | 30 kDa heat shock protein                                     |
| C1G9M8 | Fumarylacetoacetate hydrolase domain-containing protein       |
| C1G9U6 | Uroporphyrinogen decarboxylase                                |
| C1GA02 | Zinc metalloprotease                                          |
| C1GA81 | Aspartyl aminopeptidase                                       |

|        |                                                                                    |
|--------|------------------------------------------------------------------------------------|
| C1GAA3 | Morphogenesis protein                                                              |
| C1GAA7 | Cystathionine beta-synthase                                                        |
| C1GAC7 | Tyrosinase                                                                         |
| C1GAC9 | Altered inheritance of mitochondria protein 24, mitochondrial                      |
| C1GAG4 | C-1-tetrahydrofolate synthase                                                      |
| C1GAH9 | D-xylulose reductase A                                                             |
| C1GAK7 | Adenine phosphoribosyltransferase                                                  |
| C1GAM6 | C-1-tetrahydrofolate synthase                                                      |
| C1GAN6 | Rhodocoxin reductase                                                               |
| C1GAT1 | Amidase                                                                            |
| C1GAT8 | UTP--glucose-1-phosphate uridylyltransferase [EC:2.7.7.9]                          |
| C1GAT9 | Oxysterol-binding protein                                                          |
| C1GAV1 | Nicotinamidase                                                                     |
| C1GAY4 | peptide-methionine (S)-S-oxide reductase [EC:1.8.4.11]                             |
| C1GB24 | Serine/threonine-protein kinase srk1                                               |
| C1GB27 | adenylosuccinate lyase [EC:4.3.2.2]                                                |
| C1GB32 | 3,4-dihydroxy-2-butanone-4-phosphate synthase                                      |
| C1GB51 | Epsin                                                                              |
| C1GB78 | uroporphyrinogen-III synthase [EC:4.2.1.75]                                        |
| C1GB99 | Trehalose-6-phosphate synthase                                                     |
| C1GBF1 | AFG3 family protein [EC:3.4.24.-]                                                  |
| C1GBQ7 | chorismate mutase [EC:5.4.99.5]                                                    |
| C1GBS0 | carbamoyl-phosphate synthase / aspartate carbamoyltransferase [EC:6.3.5.5 2.1.3.2] |
| C1GBT1 | Serine/threonine-protein phosphatase                                               |
| C1GBW5 | Chorismate synthase                                                                |
| C1GC65 | Glutathione peroxidase                                                             |
| C1GCB4 | Dienelactone hydrolase family protein                                              |
| C1GCG5 | Glucose 1-dehydrogenase                                                            |
| C1GCI9 | Amidophosphoribosyltransferase                                                     |
| C1GCP5 | Cleft lip and palate transmembrane protein                                         |
| C1GCX5 | glycine hydroxymethyltransferase [EC:2.1.2.1]                                      |
| C1GD47 | Monothiol glutaredoxin-5                                                           |
| C1GD57 | Xaa-Pro dipeptidase [EC:3.4.13.9]                                                  |
| C1GD89 | Orotidine 5'-phosphate decarboxylase                                               |
| C1GD97 | Malic enzyme                                                                       |
| C1GDM0 | Isochorismatase domain-containing protein                                          |
| C1GDQ6 | Ubiquitin carboxyl-terminal hydrolase                                              |
| C1GDQ9 | Alkaline phosphatase                                                               |
| C1GDU7 | Pyridoxal 5'-phosphate synthase                                                    |
| C1GDX6 | Pyridox_oxase_2 domain-containing protein                                          |
| C1GDY6 | GMP synthase                                                                       |
| C1GDY8 | Nudix hydrolase domain-containing protein                                          |
| C1GE04 | Molybdopterin binding domain-containing protein                                    |
| C1GE06 | Oxidoreductase, variant 2                                                          |
| C1GE37 | NADPH2:quinone reductase                                                           |
| C1GE78 | Porphobilinogen deaminase                                                          |

|        |                                                           |
|--------|-----------------------------------------------------------|
| C1GED3 | Glycerate-and formate-dehydrogenase                       |
| C1GEH1 | Pyruvate decarboxylase                                    |
| C1GEU2 | Glycogen [starch] synthase                                |
| C1GEU7 | Farnesyl pyrophosphate synthetase                         |
| C1GEX6 | CTP synthase                                              |
| C1GEY4 | Xaa-Pro aminopeptidase [EC:3.4.11.9]                      |
| C1GEY6 | pyridoxal 5'-phosphate synthase pdxS subunit [EC:4.3.3.6] |
| C1GF19 | Lactonohydrolase                                          |
| C1GFB1 | Nicotinate-nucleotide pyrophosphorylase [carboxylating]   |
| C1GFB5 | Aldose 1-epimerase                                        |
| C1GFG3 | Phosphatidylinositol-4-phosphate 5-kinase its3            |
| C1GFR5 | ABM domain-containing protein                             |
| C1GFS6 | Phosphoribosylaminoimidazole-succinocarboxamide synthase  |
| C1GFV7 | BAR adaptor protein RVS167                                |
| C1GFX8 | manganese-transporting P-type ATPase [EC:7.2.2.-]         |
| C1GG52 | Lysine decarboxylase-like protein                         |
| C1GG60 | Phosphoribosylamine-glycine ligase                        |
| C1GG92 | Tetratricopeptide repeat domain-containing protein        |
| C1GGC2 | Cysteine proteinase 1, mitochondrial                      |
| C1GGQ3 | Formamidase                                               |
| C1GGQ6 | Phosphoglucomutase                                        |
| C1GGV9 | Aminopeptidase                                            |
| C1GGY0 | Phenol 2-monooxygenase                                    |
| C1GGY3 | Arp2/3 complex subunit Arc16                              |
| C1GGY5 | Salicylate hydroxylase                                    |
| C1GGY6 | Acid phosphatase                                          |
| C1GH49 | GMP synthase [glutamine-hydrolyzing]                      |
| C1GH68 | Acid phosphatase                                          |
| C1GHG2 | Amidase                                                   |
| C1GHK4 | Betaine aldehyde dehydrogenase                            |
| C1GHS5 | Amidase                                                   |
| C1GHU1 | D-arabinono-1,4-lactone oxidase                           |
| C1GHW9 | Dihydroxyacetone kinase                                   |
| C1GI49 | Phosphatidylinositol 4-kinase                             |
| C1GI75 | Universal stress protein                                  |
| C1GIC4 | Urease accessory protein UreG                             |
| C1GIE5 | Hydroxymethylglutaryl-CoA lyase                           |
| C1GIN4 | Annexin                                                   |
| C1GIR6 | Lectin, mannose-binding 2                                 |
| C1GJ33 | Phenylacetate 2-hydroxylase                               |
| C1GJ51 | WD repeat-containing protein                              |
| C1GJJ9 | Sorbitol utilization protein SOU2                         |
| C1GJU2 | Methylenetetrahydrofolate reductase                       |
| C1GJU4 | thymidylate kinase                                        |
| C1GJZ9 | inosine-5'-monophosphate dehydrogenase                    |
| C1GK29 | Glucan 1,3-beta-glucosidase                               |

|                            |                                                    |
|----------------------------|----------------------------------------------------|
| C1GKB3                     | S-formylglutathione hydrolase                      |
| C1GKJ4                     | Phosphoribosylglycinamide formyltransferase        |
| C1GKJ6                     | Deoxyuridine 5'-triphosphate nucleotidohydrolase   |
| C1GKJ7                     | APH domain-containing protein                      |
| C1GKN3                     | Endo-1,3(4)-beta-glucanase                         |
| C1GKQ6                     | Chitin synthase                                    |
| C1GKW3                     | Dihydroorotase                                     |
| C1GL27                     | Esterase/lipase                                    |
| C1GL55                     | Oligosaccharyltransferase                          |
| C1GLD0                     | Purine nucleoside phosphorylase                    |
| C1GLE2                     | D-xylose reductase                                 |
| C1GLG2                     | adenylate kinase [EC:2.7.4.3]                      |
| C1GLG4                     | NADP:D-xylose dehydrogenase                        |
| C1GLH2                     | Coproporphyrinogen oxidase                         |
| C1GLJ8                     | CBS and PB1 domain-containing protein              |
| C1GLK9                     | PPM-type phosphatase domain-containing protein     |
| C1GLP9                     | Diphosphomevalonate decarboxylase                  |
| C1GLZ5                     | Glycos_transf_1 domain-containing protein          |
| C1GMG6                     | 3'(2'),5'-bisphosphate nucleotidase                |
| C1GMI8                     | Mannose-1-phosphate guanyltransferase              |
| C1GMP4                     | Thymidylate synthase                               |
| C1GN16                     | Hydroxyacid-oxoacid transhydrogenase               |
| <b>Cytoskeleton</b>        |                                                    |
| A0A0A0HS41                 | Spindle pole body component                        |
| C1FYR9                     | Actin-related protein 2/3 complex subunit 5        |
| C1FYZ5                     | PTK9 protein tyrosine kinase 9                     |
| C1FZC6                     | Actin cytoskeleton-regulatory complex protein PAN1 |
| C1FZZ3                     | Profilin                                           |
| C1G0N2                     | Actin cytoskeleton protein (VIP1)                  |
| C1G1V9                     | Actin-related protein 2                            |
| C1G5M0                     | Actin cytoskeleton-regulatory complex protein SLA1 |
| C1G9F9                     | dynein light chain, cytoplasmic                    |
| C1G9M3                     | Actin-related protein 2/3 complex subunit          |
| C1GDK5                     | Fimbrin                                            |
| C1GE05                     | ADF-H domain-containing protein                    |
| C1GFT4                     | Cytoskeleton assembly control protein              |
| C1GJ13                     | coronin-1B/1C/6                                    |
| C1GKE7                     | Arp2/3 complex 34 kDa subunit                      |
| C1GLX7                     | Cofilin                                            |
| C1GM22;C1G3F2              | Tubulin alpha chain                                |
| C1GN88                     | RPEL repeat protein                                |
| <b>Signal transduction</b> |                                                    |
| C1FYL8                     | Rab-GAP TBC domain-containing protein              |
| C1FYR1                     | Rab family, other                                  |
| C1FZF8                     | Rho-GTPase-activating protein                      |
| C1G0A1                     | GDP/GTP exchange factor                            |

|                            |                                                  |
|----------------------------|--------------------------------------------------|
| C1G0G7                     | Non-specific serine/threonine protein kinase     |
| C1G6I9                     | Chimerin                                         |
| C1G749                     | Target of rapamycin complex subunit LST8         |
| C1GB04                     | 14-3-3 protein epsilon                           |
| C1GB79                     | Mitogen-activated protein kinase                 |
| C1GDI1                     | Guanyl-nucleotide exchange factor                |
| C1GED5                     | Guanine nucleotide-binding protein subunit beta  |
| C1GFR7                     | GTPase activating protein                        |
| C1GG23                     | AMPKBI domain-containing protein                 |
| C1GGW3                     | Glucose repression regulatory protein TUP1       |
| C1GJJ1                     | Serine/threonine-protein phosphatase             |
| C1GK66                     | Calcium/calmodulin-dependent protein kinase      |
| C1GKC8                     | Ras GTPase-activating protein-binding protein 2  |
| C1GMA5                     | cAMP-dependent protein kinase regulatory subunit |
| <b>No annotation found</b> |                                                  |
| A0A0A0HRV0                 | Integral membrane protein                        |
| A0A0A0HSY2                 |                                                  |
| A0A0A0HT22                 | AMPK1_CBM domain-containing protein              |
| A0A0A0HTY7                 |                                                  |
| C1FYH3                     | NA                                               |
| C1FYI0                     |                                                  |
| C1FYP5                     |                                                  |
| C1FZ07                     | PHD-type domain-containing protein               |
| C1FZH0                     | F-box domain-containing protein                  |
| C1FZM0                     | MGS207 protein                                   |
| C1FZP5                     | C2H2-type domain-containing protein              |
| C1FZV0                     |                                                  |
| C1G031                     | Short-chain dehydrogenase                        |
| C1G060                     | C2H2-type domain-containing protein              |
| C1G080                     |                                                  |
| C1G0G5                     |                                                  |
| C1G0J8                     |                                                  |
| C1G0N1                     |                                                  |
| C1G0S3                     |                                                  |
| C1G101                     | NA                                               |
| C1G1D0                     | TAM domain methyltransferase                     |
| C1G1F0                     |                                                  |
| C1G1F8                     |                                                  |
| C1G1H9                     | Lgl_C domain-containing protein                  |
| C1G1L3                     | Hsp70-like protein                               |
| C1G1R0                     |                                                  |
| C1G1S6                     |                                                  |
| C1G1U8                     |                                                  |
| C1G267                     | Vacuolar membrane protein pep3                   |
| C1G2F3                     |                                                  |
| C1G2U9                     | NA                                               |

|        |                                         |
|--------|-----------------------------------------|
| C1G2W9 |                                         |
| C1G317 |                                         |
| C1G3J7 |                                         |
| C1G3W9 | GTPase activating protein               |
| C1G4K0 |                                         |
| C1G4N7 |                                         |
| C1G4Y0 |                                         |
| C1G521 |                                         |
| C1G558 |                                         |
| C1G5B6 |                                         |
| C1G5G9 |                                         |
| C1G5K7 |                                         |
| C1G5S4 |                                         |
| C1G5V2 |                                         |
| C1G5X0 | Carrier domain-containing protein       |
| C1G606 | Parasitic phase-specific protein PSP-1  |
| C1G614 |                                         |
| C1G647 | NA                                      |
| C1G659 | SAP domain-containing protein           |
| C1G673 |                                         |
| C1G6B9 | RNA binding protein                     |
| C1G6M1 | WH2 domain-containing protein           |
| C1G6P0 | CORD and CS domain-containing protein   |
| C1G6V4 |                                         |
| C1G726 | ThiJ/Pfpl family protein                |
| C1G776 | cobW domain-containing protein          |
| C1G7A9 | Rhodanese domain-containing protein     |
| C1G7T7 | CobW domain-containing protein          |
| C1G825 |                                         |
| C1G8E3 | BSD domain-containing protein           |
| C1G8P2 |                                         |
| C1G8R8 |                                         |
| C1G8U8 |                                         |
| C1G8V1 |                                         |
| C1G8W5 | RED_N domain-containing protein         |
| C1G991 |                                         |
| C1G9F5 | FCP1 homology domain-containing protein |
| C1GA88 |                                         |
| C1GAH4 |                                         |
| C1GAQ7 |                                         |
| C1GAY7 | NA                                      |
| C1GB06 |                                         |
| C1GBH1 |                                         |
| C1GBH2 |                                         |
| C1GCD4 |                                         |
| C1GD13 |                                         |

|               |                                                      |
|---------------|------------------------------------------------------|
| C1GD64        |                                                      |
| C1GD94        |                                                      |
| C1GDR5        |                                                      |
| C1GDW6        |                                                      |
| C1GDZ9        |                                                      |
| C1GE44        |                                                      |
| C1GEL5        |                                                      |
| C1GEL7        |                                                      |
| C1GES0        | apoptosis-inducing factor 2                          |
| C1GFA1        |                                                      |
| C1GFT1        | NA                                                   |
| C1GG25        |                                                      |
| C1GG74        |                                                      |
| C1GGJ5        |                                                      |
| C1GGL6        |                                                      |
| C1GH51        |                                                      |
| C1GH86        |                                                      |
| C1GHF4        |                                                      |
| C1GHL9        | NA                                                   |
| C1GHP7;C1G8U0 |                                                      |
| C1GIH9        |                                                      |
| C1GII7        |                                                      |
| C1GII8        |                                                      |
| C1GIP9        | NA                                                   |
| C1GIR3        |                                                      |
| C1GJ28        | Stress-response A/B barrel domain-containing protein |
| C1GJ98        |                                                      |
| C1GJH6        | NA                                                   |
| C1GJH8        | NA                                                   |
| C1GJJ0        |                                                      |
| C1GJP9        |                                                      |
| C1GJT4        |                                                      |
| C1GK89        |                                                      |
| C1GKF7        |                                                      |
| C1GKR0        |                                                      |
| C1GKX2        |                                                      |
| C1GL73        |                                                      |
| C1GLF5        |                                                      |
| C1GLX2        | WW domain-containing protein                         |
| C1GM11        |                                                      |
| C1GM66        |                                                      |
| C1GM71        |                                                      |
| C1GMC8        | Rick_17kDa_Anti domain-containing protein            |
| C1GMJ4        | RING-type domain-containing protein                  |
| C1GMN0        | AmmeMemoRadiSam system protein B                     |
| C1GMS2        |                                                      |

C1GN52

GPR/FUN34 family protein

C1GN66
