# Supplementary material for: Transcriptional profiling of a fungal granuloma reveals a low metabolic activity of Paracoccidioides brasiliensis yeasts and an actively regulated host immune response
Source: PubMed Central journal article supplement (PMC10585178; doi:10.3389/fcimb.2023.1268959), 2023-10-05
Supplement: Table_11.pdf [file Table_11.pdf]

**Supplementary Table 11. Upregulated proteins of the isolated yeasts**

| Accession number         | Protein                                                                | Expression status | Log (Fold Change) | Adjusted p-value |
|--------------------------|------------------------------------------------------------------------|-------------------|-------------------|------------------|
| <b>Energy metabolism</b> |                                                                        |                   |                   |                  |
| C1FYW8                   | chitinase [EC:3.2.1.14]                                                | UP (12W)          | 2,287651          | 0,01163489       |
| C1G786                   | phosphatidylinositol 4-phosphatase [EC:3.1.3.-]                        | UP (12W)          | 2,073699          | 0,01163489       |
| C1G736                   | acyl-CoA oxidase [EC:1.3.3.6]                                          | UP(D)             | 1,997825          | 0,000799021      |
| C1GM15                   | O-acetylhomoserine/O-acetylserine sulfhydrylase [EC:2.5.1.49 2.5.1.47] | UP (12W)          | 1,849912          | 0,01816612       |
| C1G4C1                   | 1-phosphatidylinositol phosphodiesterase [EC:4.6.1.13]                 | UP(D)             | 1,73708           | 0,000889849      |
| C1FZV1                   | ribulose-phosphate 3-epimerase [EC:5.1.3.1]                            | UP (8W)           | 1,712969          | 0,005373348      |
| C1G893                   | Acyl-coenzyme A thioesterase THEM4                                     | UP (12W)          | 1,671263          | 0,025542115      |
| C1GKK3                   | F-type H <sup>+</sup> -transporting ATPase subunit delta               | UP(D)             | 1,500595          | 0,00012915       |
| C1GCH2                   | Cytochrome b mRNA-processing protein 4                                 | UP (8W)           | 1,451101          | 0,016683432      |
| C1G5J9                   | NADH-ubiquinone oxidoreductase                                         | UP(D)             | 1,386248          | 2,4505E-05       |
| C1GCI0                   | malate synthase [EC:2.3.3.9]                                           | UP (8W)           | 1,281083          | 0,006588026      |
| C1GLZ6                   | citrate synthase [EC:2.3.3.1]                                          | UP(D)             | 1,256515          | 6,79495E-05      |
| C1G137                   | electron-transferring-flavoprotein dehydrogenase [EC:1.5.5.1]          | UP(D)             | 1,245486          | 0,000389073      |
| C1G440                   | fructose-1,6-bisphosphatase I [EC:3.1.3.11]                            | UP (8W)           | 1,228492          | 0,003306043      |
| C1G8L6                   | Cytochrome b5 heme-binding domain-containing protein                   | UP (8W)           | 1,180241          | 0,034203032      |
| C1GLI3                   | fumarate hydratase, class II [EC:4.2.1.2]                              | UP (8W)           | 1,16717           | 0,003306043      |
| C1GKU3                   | hexokinase [EC:2.7.1.1]                                                | UP(D)             | 1,166301          | 9,52822E-05      |
| C1G0Z9                   | Cytochrome b5 heme-binding domain-containing protein                   | UP (8W)           | 1,156461          | 0,026541001      |
| C1G3G7                   | isocitrate lyase [EC:4.1.3.1]                                          | UP (8W)           | 1,131485          | 0,020515279      |
| C1GHR9                   | Acyl-CoA dehydrogenase                                                 | UP (8W)           | 1,109947          | 0,00687719       |
| A0A0A0HX82               | phosphoglucomutase [EC:5.4.2.2]                                        | UP (8W)           | 1,104917          | 0,035563884      |
| C1G056                   | pyruvate dehydrogenase E1 component beta subunit [EC:1.2.4.1]          | UP(D)             | 1,102255          | 4,81286E-05      |
| C1G890                   | sulfite reductase (NADPH) hemoprotein beta-component [EC:1.8.1.2]      | UP(D)             | 1,094721          | 0,000104273      |
| C1GEA0                   | V-type H <sup>+</sup> -transporting ATPase subunit D                   | UP (8W)           | 1,089669          | 0,030675825      |
| C1G6E6                   | acetyl-CoA C-acetyltransferase [EC:2.3.1.9]                            | UP (12W)          | 1,075482          | 0,042917819      |
| C1GCI7                   | isocitrate lyase [EC:4.1.3.1]                                          | UP(D)             | 1,073775          | 3,01463E-05      |
| C1G9X3                   | 2-phosphoglycerate dehydratase                                         | UP(D)             | 1,073383          | 3,96715E-05      |
| C1G6C3                   | sulfite oxidase [EC:1.8.3.1]                                           | UP (12W)          | 1,06423           | 0,022208889      |

|            |                                                                                        |          |          |             |
|------------|----------------------------------------------------------------------------------------|----------|----------|-------------|
| C1GLV8     | F-type H <sup>+</sup> -transporting ATPase subunit beta [EC:7.1.2.2]                   | UP(D)    | 1,054902 | 1,34334E-05 |
| C1G6K0     | isocitrate dehydrogenase (NAD <sup>+</sup> ) [EC:1.1.1.41]                             | UP(D)    | 1,038524 | 8,32334E-05 |
| C1GA89     | inorganic pyrophosphatase [EC:3.6.1.1]                                                 | UP(D)    | 1,036182 | 7,68103E-05 |
| A0A0A0HRM2 | V-type H <sup>+</sup> -transporting ATPase subunit A [EC:7.1.2.2]                      | UP(D)    | 1,032296 | 0,002071441 |
| C1G294     | succinyl-CoA synthetase alpha subunit [EC:6.2.1.4 6.2.1.5]                             | UP(D)    | 1,023307 | 2,4505E-05  |
| C1GCX3     | 2,3-bisphosphoglycerate-independent phosphoglycerate mutase [EC:5.4.2.12]              | UP(D)    | 1,020784 | 8,26625E-05 |
| C1G278     | acyl-CoA dehydrogenase [EC:1.3.8.7]                                                    | UP (8W)  | 1,013341 | 0,021884365 |
| C1G547     | pyruvate dehydrogenase E1 component alpha subunit [EC:1.2.4.1]                         | UP (8W)  | 1,00685  | 0,020389391 |
| A0A0A0HUI2 | NADH dehydrogenase [ubiquinone] 1 alpha subcomplex assembly factor 3                   | UP (12W) | 1,006754 | 0,026397315 |
| C1GGE5     | acetyl-CoA C-acetyltransferase [EC:2.3.1.9]                                            | UP (8W)  | 1,006458 | 0,00766075  |
| C1GKQ0     | Pyruvate decarboxylase                                                                 | UP (8W)  | 0,998956 | 0,018887049 |
| C1GIX7     | pyruvate dehydrogenase E2 component (dihydrolipoamide acetyltransferase) [EC:2.3.1.12] | UP(D)    | 0,992972 | 3,04379E-05 |
| C1G1H4     | pyruvate decarboxylase [EC:4.1.1.1]                                                    | UP (8W)  | 0,981041 | 0,031728351 |
| A0A0A0HST0 | F-type H <sup>+</sup> -transporting ATPase subunit g                                   | UP (8W)  | 0,975137 | 0,016824995 |
| C1G002     | 6-phosphofructokinase 1 [EC:2.7.1.11]                                                  | UP(D)    | 0,974763 | 0,000203639 |
| C1FZY1     | L-lactate dehydrogenase (cytochrome) [EC:1.1.2.3]                                      | UP(D)    | 0,969166 | 0,000414153 |
| C1GKI5     | 6-phosphogluconolactonase [EC:3.1.1.31]                                                | UP (12W) | 0,957917 | 0,0402877   |
| C1G1C8     | fructose-bisphosphate aldolase, class II [EC:4.1.2.13]                                 | UP (8W)  | 0,955297 | 0,018970081 |
| C1GI20     | triosephosphate isomerase (TIM) [EC:5.3.1.1]                                           | UP(D)    | 0,953067 | 3,69337E-05 |
| C1G421     | acetyl-CoA acyltransferase 1 [EC:2.3.1.16]                                             | UP(D)    | 0,948955 | 0,000242791 |
| C1G7N9     | acetyl-CoA acyltransferase 1 [EC:2.3.1.16]                                             | UP(D)    | 0,948085 | 0,000299791 |
| C1GBX3     | oxalate---CoA ligase [EC:6.2.1.8]                                                      | UP(D)    | 0,945242 | 0,000224532 |
| C1G0C7     | succinyl-CoA synthetase beta subunit [EC:6.2.1.4 6.2.1.5]                              | UP(D)    | 0,933972 | 0,00015078  |
| C1GAG3     | isocitrate dehydrogenase [EC:1.1.1.42]                                                 | UP(D)    | 0,931739 | 0,000284775 |
| C1GCI8     | citrate synthase [EC:2.3.3.1]                                                          | UP(D)    | 0,926697 | 0,000379134 |
| C1GJI4     | transaldolase [EC:2.2.1.2]                                                             | UP(D)    | 0,91853  | 0,000210172 |
| C1GIX4     | malate dehydrogenase [EC:1.1.1.37]                                                     | UP (8W)  | 0,918035 | 0,00687719  |

|                              |                                                                          |          |          |             |
|------------------------------|--------------------------------------------------------------------------|----------|----------|-------------|
| C1G5V6                       | F-type H <sup>+</sup> -transporting ATPase subunit alpha                 | UP(D)    | 0,907412 | 0,000157398 |
| C1GMZ1                       | multifunctional beta-oxidation protein [EC:4.2.1.- 1.1.1.-]              | UP(D)    | 0,893796 | 8,21503E-05 |
| C1G8R5                       | 6-phosphogluconate dehydrogenase [EC:1.1.1.44 1.1.1.343]                 | UP (12W) | 0,89173  | 0,034781743 |
| C1GC82                       | transketolase [EC:2.2.1.1]                                               | UP(D)    | 0,887039 | 0,000155336 |
| C1G2P3                       | enoyl-CoA hydratase [EC:4.2.1.17]                                        | UP(D)    | 0,886518 | 0,000267669 |
| C1G8H3                       | cytochrome b5                                                            | UP (8W)  | 0,869989 | 0,042340628 |
| C1G7K8                       | cytochrome c peroxidase [EC:1.11.1.5]                                    | UP(D)    | 0,860697 | 0,000634175 |
| A0A0A0HUM5                   | aconitate hydratase [EC:4.2.1.3]                                         | UP(D)    | 0,859641 | 0,000267669 |
| C1G5Y7                       | Cytochrome b5 heme-binding domain-containing protein                     | UP(D)    | 0,85448  | 0,000299791 |
| C1GMD0                       | NADH dehydrogenase (ubiquinone) Fe-S protein 8 [EC:7.1.1.2]              | UP (12W) | 0,852547 | 0,049199686 |
| C1GK20                       | D-xylose reductase                                                       | UP (8W)  | 0,834838 | 0,010164498 |
| C1G2W2                       | pyruvate kinase [EC:2.7.1.40]                                            | UP(D)    | 0,831881 | 7,68103E-05 |
| C1GBZ4                       | glutamate dehydrogenase (NADP+) [EC:1.4.1.4]                             | UP (12W) | 0,824982 | 0,03059419  |
| C1GLX6                       | cytochrome c oxidase subunit 4                                           | UP (12W) | 0,820956 | 0,040504859 |
| C1GG42                       | NADH dehydrogenase (ubiquinone) 1 alpha subcomplex subunit 6             | UP(D)    | 0,81728  | 0,000904473 |
| A0A0A0HY53                   | NADPH-dependent diflavin oxidoreductase 1                                | UP(D)    | 0,781448 | 0,000783867 |
| C1G9P1                       | isocitrate dehydrogenase (NAD+) [EC:1.1.1.41]                            | UP (8W)  | 0,780621 | 0,028162637 |
| C1GLB8                       | malate dehydrogenase [EC:1.1.1.37]                                       | UP (8W)  | 0,733022 | 0,028710327 |
| C1G256                       | NADH dehydrogenase [ubiquinone] 1 alpha subcomplex subunit               | UP (8W)  | 0,685861 | 0,033558288 |
| C1G5F6                       | glyceraldehyde 3-phosphate dehydrogenase (phosphorylating) [EC:1.2.1.12] | UP (8W)  | 0,64594  | 0,040733231 |
| <b>Virulence factors</b>     |                                                                          |          |          |             |
| C1GLU3                       | Alcohol dehydrogenase                                                    | UP (8W)  | 1,97199  | 0,003306043 |
| C1G2U7                       | superoxide dismutase, Fe-Mn family [EC:1.15.1.1]                         | UP(D)    | 1,400316 | 3,96715E-05 |
| C1G7L4                       | alpha-1,3-glucan synthase [EC:2.4.1.183]                                 | UP(D)    | 1,217064 | 0,000224532 |
| C1GDG7                       | Beta-1,6-glucan biosynthesis protein                                     | UP (8W)  | 1,169829 | 0,015915364 |
| C1G489                       | superoxide dismutase, Fe-Mn family [EC:1.15.1.1]                         | UP (8W)  | 1,167965 | 0,005443781 |
| <b>Amino acid metabolism</b> |                                                                          |          |          |             |
| C1GMI2                       | 4-hydroxyphenylpyruvate dioxygenase [EC:1.13.11.27]                      | UP (8W)  | 1,88694  | 0,003306043 |
| C1G7F9                       | 3-deoxy-7-phosphoheptulonate synthase [EC:2.5.1.54]                      | UP(D)    | 1,830968 | 9,02668E-05 |
| C1G949                       | ATP phosphoribosyltransferase                                            | UP (8W)  | 1,700403 | 0,019833298 |
| C1G792                       | threonine dehydratase [EC:4.3.1.19]                                      | UP (8W)  | 1,622606 | 0,003306043 |

|            |                                                                                                                               |          |          |             |
|------------|-------------------------------------------------------------------------------------------------------------------------------|----------|----------|-------------|
| C1G0F9     | kynureninase [EC:3.7.1.3]                                                                                                     | UP (8W)  | 1,610815 | 0,005443781 |
| C1G4U7     | Glycine cleavage system H protein                                                                                             | UP (8W)  | 1,494766 | 0,047711396 |
| C1G8V0     | aspartate aminotransferase,<br>cytoplasmic [EC:2.6.1.1]                                                                       | UP (8W)  | 1,476232 | 0,007296661 |
| C1GB53     | anthranilate synthase component I<br>[EC:4.1.3.27]                                                                            | UP(D)    | 1,460526 | 3,82641E-05 |
| C1GD55     | 5-oxoprolinase (ATP-hydrolysing)<br>[EC:3.5.2.9]                                                                              | UP(D)    | 1,419538 | 0,000117426 |
| C1GHZ0     | 3-hydroxyisobutyryl-CoA hydrolase<br>[EC:3.1.2.4]                                                                             | UP (8W)  | 1,352655 | 0,00766075  |
| C1GHM0     | Histidine biosynthesis trifunctional<br>protein                                                                               | UP (8W)  | 1,329082 | 0,025112452 |
| C1GJ05     | dihydroxy-acid dehydratase<br>[EC:4.2.1.9]                                                                                    | UP(D)    | 1,268743 | 0,000108069 |
| C1G4R2     | S-adenosylmethionine synthetase<br>[EC:2.5.1.6]                                                                               | UP(D)    | 1,266777 | 0,000168286 |
| C1GLT7     | 5-<br>methyltetrahydropteroyltriglutamate<br>--homocysteine methyltransferase<br>[EC:2.1.1.14]                                | UP(D)    | 1,200347 | 5,40638E-05 |
| C1GJD0     | 3-methylcrotonyl-CoA carboxylase<br>alpha subunit [EC:6.4.1.4]                                                                | UP(D)    | 1,180525 | 3,69337E-05 |
| C1G3P8     | malonate-semialdehyde<br>dehydrogenase (acetylating) /<br>methylmalonate-semialdehyde<br>dehydrogenase [EC:1.2.1.18 1.2.1.27] | UP(D)    | 1,176664 | 1,17191E-05 |
| C1GAY3     | proline dehydrogenase [EC:1.5.5.2]                                                                                            | UP (8W)  | 1,156817 | 0,005276659 |
| C1G2X0     | homocitrate dehydrogenase<br>[EC:1.1.1.87]                                                                                    | UP(D)    | 1,153866 | 0,000141366 |
| C1GGQ7     | dihydrolipoamide dehydrogenase<br>[EC:1.8.1.4]                                                                                | UP(D)    | 1,142627 | 3,96715E-05 |
| A0A0A0HTR8 | omega-amidase [EC:3.5.1.3]                                                                                                    | UP (8W)  | 1,116326 | 0,003306043 |
| C1G3G3     | gamma-glutamyltranspeptidase /<br>glutathione hydrolase [EC:2.3.2.2<br>3.4.19.13]                                             | UP (8W)  | 1,1077   | 0,017093056 |
| A0A0A0HRQ4 | glutaryl-CoA dehydrogenase<br>[EC:1.3.8.6]                                                                                    | UP(D)    | 1,09719  | 0,000242791 |
| C1G6V9     | aminomethyltransferase [EC:2.1.2.10]                                                                                          | UP(D)    | 1,090372 | 0,000514068 |
| C1G8P1     | 2-oxoisovalerate dehydrogenase E1<br>component beta subunit [EC:1.2.4.4]                                                      | UP(D)    | 1,088197 | 0,002723494 |
| C1GLM1     | asparagine synthase (glutamine-<br>hydrolysing) [EC:6.3.5.4]                                                                  | UP(D)    | 1,087294 | 0,000815211 |
| C1G3V5     | aspartate aminotransferase,<br>mitochondrial [EC:2.6.1.1]                                                                     | UP (8W)  | 1,080226 | 0,021163629 |
| C1GIE3     | acetylornithine aminotransferase<br>[EC:2.6.1.11]                                                                             | UP(D)    | 1,078031 | 0,000352749 |
| C1G9P8     | glutamine---fructose-6-phosphate<br>transaminase (isomerizing)<br>[EC:2.6.1.16]                                               | UP (12W) | 1,03215  | 0,018150971 |

|            |                                                                                                                                                  |          |          |             |
|------------|--------------------------------------------------------------------------------------------------------------------------------------------------|----------|----------|-------------|
| C1GBD8     | 3-oxoacid CoA-transferase<br>[EC:2.8.3.5]                                                                                                        | UP(D)    | 1,030689 | 0,000251289 |
| C1G020     | glycine dehydrogenase [EC:1.4.4.2]                                                                                                               | UP(D)    | 1,025612 | 0,000361455 |
| C1G8C8     | 2-oxoisovalerate dehydrogenase E1<br>component alpha subunit [EC:1.2.4.4]                                                                        | UP (12W) | 1,022733 | 0,035275544 |
| C1FYJ9     | pentafunctional AROM polypeptide<br>[EC:4.2.3.4 4.2.1.10 1.1.1.25 2.7.1.71<br>2.5.1.19]                                                          | UP(D)    | 1,014849 | 0,000246651 |
| C1GJD4     | 3-methylcrotonyl-CoA carboxylase<br>beta subunit [EC:6.4.1.4]                                                                                    | UP (8W)  | 1,005172 | 0,029479502 |
| C1GF86     | Cys-Gly metallodipeptidase DUG1<br>[EC:3.4.13.-]                                                                                                 | UP(D)    | 0,990064 | 0,000299791 |
| C1FZL3     | dipeptidyl aminopeptidase B<br>[EC:3.4.14.-]                                                                                                     | UP(D)    | 0,981364 | 7,68103E-05 |
| A0A0A0HX63 | acetolactate synthase I/II/III large<br>subunit [EC:2.2.1.6]                                                                                     | UP (12W) | 0,980707 | 0,021736563 |
| C1G312     | ornithine--oxo-acid transaminase<br>[EC:2.6.1.13]                                                                                                | UP(D)    | 0,971222 | 0,001750463 |
| C1G596     | 3-hydroxyisobutyrate/3-<br>hydroxypropionate dehydrogenase<br>[EC:1.1.1.31 1.1.1.59]                                                             | UP (12W) | 0,95798  | 0,023164795 |
| C1G7L2     | 3-isopropylmalate dehydratase<br>[EC:4.2.1.33]                                                                                                   | UP(D)    | 0,957441 | 0,000334937 |
| C1GJ38     | anthranilate synthase / indole-3-<br>glycerol phosphate synthase /<br>phosphoribosylanthranilate<br>isomerase [EC:4.1.3.27 4.1.1.48<br>5.3.1.24] | UP (8W)  | 0,954045 | 0,032849372 |
| C1G452     | saccharopine dehydrogenase<br>(NADP+, L-glutamate forming)<br>[EC:1.5.1.10]                                                                      | UP(D)    | 0,936795 | 0,000490826 |
| C1GI69     | tryptophan synthase [EC:4.2.1.20]                                                                                                                | UP(D)    | 0,929358 | 0,000157398 |
| C1G6H2     | threonine synthase [EC:4.2.3.1]                                                                                                                  | UP (8W)  | 0,928831 | 0,017024344 |
| C1GDG5     | cystathionine beta-synthase<br>[EC:4.2.1.22]                                                                                                     | UP(D)    | 0,921903 | 3,96715E-05 |
| C1GLF6     | L-2-aminoadipate reductase<br>[EC:1.2.1.95]                                                                                                      | UP (8W)  | 0,918797 | 0,01136855  |
| C1GJD3     | isovaleryl-CoA dehydrogenase<br>[EC:1.3.8.4]                                                                                                     | UP(D)    | 0,907459 | 4,72181E-05 |
| C1GCG7     | Arginine-requiring protein 2                                                                                                                     | UP (8W)  | 0,903039 | 0,043289385 |
| C1GBT4     | 1-pyrroline-5-carboxylate<br>dehydrogenase [EC:1.2.1.88]                                                                                         | UP(D)    | 0,899338 | 0,000192931 |
| C1G1E5     | hydroxymethylglutaryl-CoA synthase<br>[EC:2.3.3.10]                                                                                              | UP(D)    | 0,863688 | 0,000330967 |
| C1G7A3     | succinate-semialdehyde<br>dehydrogenase / glutarate-<br>semialdehyde dehydrogenase<br>[EC:1.2.1.16 1.2.1.79 1.2.1.20]                            | UP(D)    | 0,80927  | 0,000205583 |
| C1G0L5     | Choline dehydrogenase                                                                                                                            | UP(D)    | 0,807895 | 0,000190119 |

|                                |                                                                                                                 |          |          |             |
|--------------------------------|-----------------------------------------------------------------------------------------------------------------|----------|----------|-------------|
| C1FYL2                         | argininosuccinate synthase<br>[EC:6.3.4.5]                                                                      | UP (8W)  | 0,738199 | 0,020389391 |
| <b>Lipid metabolism</b>        |                                                                                                                 |          |          |             |
| C1G239                         | Protein PBN1                                                                                                    | UP (12W) | 2,94041  | 0,021905016 |
| C1GM85                         | phospholipid:diacylglycerol<br>acyltransferase [EC:2.3.1.158]                                                   | UP(D)    | 2,142193 | 2,03704E-05 |
| C1G6N9                         | ethanolamine kinase [EC:2.7.1.82]                                                                               | UP (8W)  | 2,088055 | 0,026728024 |
| C1GDJ1                         | acetyl-CoA carboxylase / biotin<br>carboxylase 1 [EC:6.4.1.2 6.3.4.14<br>2.1.3.15]                              | UP(D)    | 1,642269 | 8,26625E-05 |
| C1GMV6                         | Squalene synthase                                                                                               | UP(D)    | 1,60452  | 0,000345886 |
| C1G064                         | fatty acid synthase subunit alpha,<br>fungi type [EC:2.3.1.86]                                                  | UP (8W)  | 1,60077  | 0,016683432 |
| C1GKG2                         | 17beta-estradiol 17-dehydrogenase /<br>very-long-chain 3-oxoacyl-CoA<br>reductase [EC:1.1.1.62 1.1.1.330]       | UP(D)    | 1,478377 | 0,000783867 |
| C1FYG6                         | Phosphatidate cytidylyltransferase,<br>mitochondrial                                                            | UP (12W) | 1,415348 | 0,049944763 |
| C1GDH4                         | leukotriene-A4 hydrolase [EC:3.3.2.6]                                                                           | UP(D)    | 1,334074 | 0,00076067  |
| C1G054                         | mitochondrial enoyl-[acyl-carrier<br>protein] reductase / trans-2-enoyl-<br>CoA reductase [EC:1.3.1.- 1.3.1.38] | UP(D)    | 1,283947 | 0,000118    |
| C1GBJ2                         | ATP citrate synthase                                                                                            | UP(D)    | 1,230404 | 1,20156E-05 |
| C1GBJ3                         | ATP citrate synthase                                                                                            | UP(D)    | 1,202373 | 3,04379E-05 |
| C1G2R7                         | acyl-coenzyme A thioesterase 13<br>[EC:3.1.2.-]                                                                 | UP (8W)  | 1,111151 | 0,014300697 |
| C1GGY2                         | 3-oxoacyl-(acyl-carrier-protein)<br>reductase                                                                   | UP (8W)  | 1,106916 | 0,004704236 |
| C1GDE5                         | propionyl-CoA synthetase<br>[EC:6.2.1.17]                                                                       | UP(D)    | 1,097055 | 0,000330967 |
| C1GD48                         | ethanolamine-phosphate<br>cytidylyltransferase [EC:2.7.7.14]                                                    | UP (8W)  | 1,024057 | 0,034729177 |
| C1G0P4                         | long-chain acyl-CoA synthetase<br>[EC:6.2.1.3]                                                                  | UP (12W) | 0,976811 | 0,017605147 |
| C1GC21                         | sterol carrier protein 2 [EC:2.3.1.176]                                                                         | UP (12W) | 0,849111 | 0,046563052 |
| C1GMW7                         | sphingolipid C9-methyltransferase<br>[EC:2.1.1.317]                                                             | UP (12W) | 0,774656 | 0,038118607 |
| <b>Gene/protein regulation</b> |                                                                                                                 |          |          |             |
| C1G5S5                         | small nuclear ribonucleoprotein G<br>mRNA (guanine-N7-)-                                                        | UP(D)    | 3,440148 | 7,40048E-06 |
| C1GML3                         | methyltransferase [EC:2.1.1.56]                                                                                 | UP (8W)  | 2,892278 | 0,004911557 |
| C1GIZ3                         | elongation factor 3                                                                                             | UP(D)    | 2,62974  | 2,4505E-05  |
| C1GMY8                         | Leucine aminopeptidase 1                                                                                        | UP(D)    | 2,609778 | 0,001398865 |
| C1G3W8                         | geranylgeranyl transferase type-2<br>subunit alpha [EC:2.5.1.60]                                                | UP(D)    | 2,256317 | 0,001164899 |
| C1G283                         | large subunit ribosomal protein L8e                                                                             | UP(D)    | 2,208918 | 1,17191E-05 |
| C1GBM4                         | large subunit ribosomal protein L26e                                                                            | UP (8W)  | 2,15011  | 0,016346151 |
| C1GA83                         | ATP-dependent Clp protease,<br>protease subunit [EC:3.4.21.92]                                                  | UP(D)    | 2,13273  | 0,000127385 |

|            |                                                      |          |          |             |
|------------|------------------------------------------------------|----------|----------|-------------|
| C1GGN1     | signal recognition particle subunit SRP14            | UP (8W)  | 2,119582 | 0,02857375  |
| C1FYI4     | DNA-directed RNA polymerase subunit                  | UP (8W)  | 2,111115 | 0,014400463 |
| A0A0A0HTF2 | tRNA ligase [EC:6.5.1.3]                             | UP(D)    | 2,094767 | 0,000271085 |
| C1GC24     | nucleolar protein 15                                 | UP (8W)  | 2,060639 | 0,005373348 |
| C1G4B4     | Zn(2)-C6 fungal-type domain-containing protein       | UP (8W)  | 2,048338 | 0,027199995 |
| C1G9F6     | protein phosphatase 1 regulatory subunit 7           | UP(D)    | 2,043921 | 8,21503E-05 |
| C1G3W6     | U3 small nucleolar RNA-associated protein 5          | UP (8W)  | 2,039218 | 0,026277361 |
| A0A0A0HVY3 | cullin 1                                             | UP (12W) | 2,006905 | 0,021736563 |
| C1G8D9     | serine/threonine-protein phosphatase 2A activator    | UP (8W)  | 2,004832 | 0,010388376 |
| C1G942     | large subunit ribosomal protein L10e                 | UP(D)    | 1,924594 | 1,34334E-05 |
| C1GMR0     | small subunit ribosomal protein S29                  | UP(D)    | 1,908814 | 0,000203639 |
| C1GLP2     | SAP domain-containing protein                        | UP (12W) | 1,903358 | 0,026993774 |
| A0A0A0HV62 | Ribosomal protein L19                                | UP(D)    | 1,882064 | 6,51881E-05 |
| C1GB13     | large subunit ribosomal protein L23e                 | UP(D)    | 1,855043 | 2,03704E-05 |
| A0A0A0HUZ4 | 26S protease subunit RPT4                            | UP (8W)  | 1,827766 | 0,013621638 |
| C1FZ26     | 3-demethylubiquinone-9 3-methyltransferase           | UP (12W) | 1,807556 | 0,034503547 |
| C1GEM5     | 5'-3' exoribonuclease 1 [EC:3.1.13.-]                | UP (8W)  | 1,799992 | 0,043289385 |
| C1GCT4     | SBDS domain-containing protein                       | UP (8W)  | 1,799138 | 0,021206174 |
| C1GLD3     | FACT complex subunit SPT16                           | UP(D)    | 1,778408 | 7,40048E-06 |
| C1G5E9     | Peptidylprolyl isomerase                             | UP (8W)  | 1,758151 | 0,020249991 |
| C1GJ57     | RRM domain-containing protein                        | UP(D)    | 1,741767 | 0,000889849 |
| C1GAL5     | Prp8 binding protein                                 | UP (8W)  | 1,734938 | 0,030608798 |
| C1G9X9     | large subunit ribosomal protein L36e                 | UP(D)    | 1,710834 | 0,000330967 |
| C1GE49     | small subunit ribosomal protein S5                   | UP (8W)  | 1,703213 | 0,005516536 |
| C1FYJ7     | histone H3                                           | UP (12W) | 1,68621  | 0,021989098 |
| C1FYQ6     | protein TIF31                                        | UP(D)    | 1,684905 | 8,85577E-05 |
| A0A0A0HX33 | actin-related protein 8                              | UP (12W) | 1,664309 | 0,041170587 |
| C1G7Q9     | small nuclear ribonucleoprotein E                    | UP (8W)  | 1,66351  | 0,013118378 |
| C1GCS4     | splicing factor 3B subunit 3                         | UP (8W)  | 1,629771 | 0,018970081 |
| C1GF85     | 60S ribosomal protein L20                            | UP (8W)  | 1,616    | 0,017179205 |
| C1G7T1     | zinc-finger protein CreA/MIG                         | UP (8W)  | 1,585041 | 0,014402336 |
| C1G9C0     | large subunit ribosomal protein L15e                 | UP(D)    | 1,575588 | 1,17191E-05 |
| C1GFX4     | translation initiation factor 2 subunit 1            | UP(D)    | 1,57216  | 0,000108069 |
| C1GK69     | DNA-directed RNA polymerases I and III subunit RPAC1 | UP (8W)  | 1,570786 | 0,026515476 |
| C1G650     | elongation factor G                                  | UP (12W) | 1,565953 | 0,049199686 |
| C1GHJ0     | large subunit ribosomal protein L17e                 | UP(D)    | 1,5587   | 5,14954E-05 |
| C1GEE2     | protein disulfide-isomerase A6 [EC:5.3.4.1]          | UP (8W)  | 1,545698 | 0,012912291 |
| A0A0A0HUJ5 | large subunit ribosomal protein L3e                  | UP(D)    | 1,539754 | 3,01463E-05 |

|            |                                                                       |          |          |             |
|------------|-----------------------------------------------------------------------|----------|----------|-------------|
| C1G9I8     | PRA1 family protein 1                                                 | UP (8W)  | 1,516922 | 0,01155815  |
| C1GJJ6     | chloride channel, nucleotide-sensitive, 1A                            | UP (8W)  | 1,505049 | 0,034776299 |
| C1G8T3     | mitochondrial protein import protein ZIM17                            | UP (8W)  | 1,500885 | 0,034875515 |
| C1G172     | large subunit ribosomal protein L27e                                  | UP(D)    | 1,474931 | 3,96715E-05 |
| C1GKL8     | protein transport protein SEC23                                       | UP(D)    | 1,46937  | 3,04379E-05 |
| C1G540     | large subunit ribosomal protein L7/L12                                | UP (8W)  | 1,466679 | 0,037383913 |
| C1G654     | THO complex subunit 2                                                 | UP (8W)  | 1,462957 | 0,043943784 |
| C1FZ57     | large subunit ribosomal protein L32e                                  | UP(D)    | 1,446479 | 0,000513647 |
| C1GGW1     | nuclear cap-binding protein subunit 1                                 | UP (8W)  | 1,419163 | 0,006836697 |
| A0A0A0HTY8 | nucleolar protein 58                                                  | UP(D)    | 1,401489 | 0,00064283  |
| C1G015     | pre-mRNA-splicing factor RBM22/SLT11                                  | UP (8W)  | 1,400251 | 0,012238638 |
| C1GKR7     | large subunit ribosomal protein L24e                                  | UP(D)    | 1,383279 | 0,000160866 |
| C1G186     | translation initiation factor 3 subunit E                             | UP (8W)  | 1,370763 | 0,021880757 |
| C1GFI8     | translation initiation factor 2A                                      | UP (8W)  | 1,361679 | 0,003306043 |
| C1FYJ6     | histone H4                                                            | UP (12W) | 1,35582  | 0,016446335 |
| C1GAW6     | large subunit ribosomal protein L34e                                  | UP(D)    | 1,349162 | 0,000117482 |
| C1GA20     | large subunit ribosomal protein L11e                                  | UP(D)    | 1,345788 | 0,000108069 |
| C1G619     | ribosome assembly protein SQT1                                        | UP (12W) | 1,343881 | 0,012496752 |
| C1G5J0     | small subunit ribosomal protein S15e                                  | UP (8W)  | 1,335105 | 0,042150048 |
| C1G016     | complex III assembly factor LYRM7                                     | UP (8W)  | 1,330954 | 0,01509806  |
| C1G5N0     | casein kinase II subunit alpha [EC:2.7.11.1]                          | UP(D)    | 1,31369  | 0,000931279 |
| A0A0A0HVT2 | 26S proteasome regulatory subunit T3                                  | UP(D)    | 1,298684 | 1,17191E-05 |
| C1G0P0     | molecular chaperone DnaK                                              | UP (8W)  | 1,293241 | 0,005759296 |
| C1GLJ7     | small subunit ribosomal protein S26e                                  | UP (12W) | 1,281673 | 0,045542537 |
| C1G945     | large subunit ribosomal protein L30e                                  | UP (12W) | 1,277072 | 0,017924577 |
| C1G7C1     | 26S proteasome regulatory subunit N2                                  | UP(D)    | 1,274031 | 3,03631E-05 |
| C1FZ00     | large subunit ribosomal protein L37Ae                                 | UP(D)    | 1,270958 | 0,000588591 |
| C1GAT3     | splicing factor U2AF 35 kDa subunit                                   | UP(D)    | 1,270958 | 0,000514068 |
| C1GBC4     | mannosyl-oligosaccharide alpha-1,2-mannosidase [EC:3.2.1.113]         | UP(D)    | 1,267656 | 8,26625E-05 |
| C1G5P0     | pre-mRNA-splicing helicase BRR2 [EC:3.6.4.13]                         | UP(D)    | 1,267304 | 0,000134116 |
| C1GAF6     | mitochondrial FAD-linked sulfhydryl oxidase [EC:1.8.3.2]              | UP (12W) | 1,255138 | 0,048940396 |
| C1FYE5     | glutamyl-tRNA synthetase [EC:6.1.1.17]                                | UP (8W)  | 1,249736 | 0,027076205 |
| C1G1M5     | ATP-dependent Clp protease ATP-binding subunit ClpB                   | UP(D)    | 1,231603 | 1,34334E-05 |
| C1G561     | aminoacyl tRNA synthase complex-interacting multifunctional protein 1 | UP (8W)  | 1,22154  | 0,01136855  |



|             |                                                                          |          |          |             |
|-------------|--------------------------------------------------------------------------|----------|----------|-------------|
| C1GIL9      | arginyl-tRNA synthetase [EC:6.1.1.19]                                    | UP (8W)  | 1,216406 | 0,005965772 |
| C1G4C0      | N-alpha-acetyltransferase 15/16,<br>NatA auxiliary subunit               | UP(D)    | 1,213493 | 7,68103E-05 |
| A0A0A0HVVH2 | large subunit ribosomal protein L31e                                     | UP (8W)  | 1,196067 | 0,003306043 |
| C1GA10      | ATP-dependent RNA helicase DDX3X<br>[EC:3.6.4.13]                        | UP(D)    | 1,170383 | 0,000222134 |
| C1FZL1      | 26S proteasome regulatory subunit<br>T1                                  | UP(D)    | 1,168201 | 0,000192931 |
| C1G686      | translation initiation factor 6                                          | UP (12W) | 1,168028 | 0,038574499 |
| C1GEJ7      | transitional endoplasmic reticulum<br>ATPase                             | UP(D)    | 1,162316 | 1,34334E-05 |
| C1GL26      | translation initiation factor 3 subunit<br>B                             | UP(D)    | 1,162189 | 0,000117426 |
| C1GL49      | replication factor A1                                                    | UP(D)    | 1,153131 | 0,000301604 |
| C1GLD7      | dolichyl-phosphate-mannose-protein<br>mannosyltransferase [EC:2.4.1.109] | UP (12W) | 1,146952 | 0,010907089 |
| C1GJ94      | tRNA threonylcarbamoyladenosine<br>dehydratase                           | UP (12W) | 1,143352 | 0,015401213 |
| C1GK43      | C2H2-type domain-containing protein                                      | UP (12W) | 1,139825 | 0,035718382 |
| A0A0A0HVP9  | small subunit ribosomal protein S30e                                     | UP(D)    | 1,13966  | 0,000251289 |
| C1GDG9      | Mitochondrial inner membrane<br>protease ATP23                           | UP (8W)  | 1,131916 | 0,033611475 |
| C1G390      | phenylalanyl-tRNA synthetase beta<br>chain [EC:6.1.1.20]                 | UP (8W)  | 1,130716 | 0,025085175 |
| C1GF47      | large subunit ribosomal protein<br>L23Ae                                 | UP (8W)  | 1,130133 | 0,014815223 |
| A0A0A0HVN3  | ATP-dependent RNA helicase<br>DDX5/DBP2 [EC:3.6.4.13]                    | UP(D)    | 1,124478 | 2,4505E-05  |
| C1FZ06      | NA                                                                       | UP(D)    | 1,107628 | 1,34334E-05 |
| C1GJT7      | mannosyl-oligosaccharide alpha-1,3-<br>glucosidase [EC:3.2.1.207]        | UP(D)    | 1,10585  | 0,00023807  |
| C1GAG5      | translation initiation factor 3 subunit I                                | UP (12W) | 1,099492 | 0,044193099 |
| C1G8V3      | tyrosyl-tRNA synthetase [EC:6.1.1.1]                                     | UP(D)    | 1,099311 | 0,000811179 |
| C1G6F6      | heat shock 70kDa protein 1/2/6/8                                         | UP (8W)  | 1,098813 | 0,005276659 |
| C1GJI0      | Probable endonuclease LCL3                                               | UP (8W)  | 1,095519 | 0,035360636 |
| C1G373      | translation initiation factor 3 subunit<br>C                             | UP (8W)  | 1,094932 | 0,006800777 |
| C1FZ84      | Translocon-associated protein                                            | UP (12W) | 1,08839  | 0,011398206 |
| C1G3P9      | calnexin                                                                 | UP(D)    | 1,087582 | 1,93952E-05 |
| C1GBG1      | aspartyl-tRNA synthetase<br>[EC:6.1.1.12]                                | UP (8W)  | 1,086092 | 0,028162637 |
| C1G5M9      | valyl-tRNA synthetase [EC:6.1.1.9]                                       | UP(D)    | 1,082316 | 4,61283E-05 |
| C1G7F3      | Piwi domain-containing protein                                           | UP (12W) | 1,081471 | 0,016510517 |
| C1G159      | 26S proteasome regulatory subunit<br>T5                                  | UP (8W)  | 1,075184 | 0,016060643 |
| C1G631      | 26S proteasome regulatory subunit<br>T2                                  | UP(D)    | 1,074279 | 0,000437759 |
| C1GEN5      | large subunit ribosomal protein L4e                                      | UP(D)    | 1,071924 | 3,04379E-05 |
| C1GAE3      | mitochondrial transcription factor 1                                     | UP(D)    | 1,071131 | 5,60622E-05 |

|             |                                                           |          |          |             |
|-------------|-----------------------------------------------------------|----------|----------|-------------|
| C1FYW9;C1GL |                                                           |          |          |             |
| A5          | Ubiquitin-60S ribosomal protein L40                       | UP (8W)  | 1,06592  | 0,02857375  |
| C1G570      | prolyl-tRNA synthetase [EC:6.1.1.15]                      | UP(D)    | 1,06561  | 7,68103E-05 |
| C1G6V3      | Ubiquitin-like domain-containing protein                  | UP (8W)  | 1,062992 | 0,035329695 |
| C1GAQ4      | DNA-directed RNA polymerase II subunit RPB2 [EC:2.7.7.6]  | UP(D)    | 1,062347 | 0,000242791 |
| C1GLX8      | chaperonin GroEL                                          | UP (8W)  | 1,056111 | 0,00766075  |
| C1GG76      | small subunit ribosomal protein S18e                      | UP(D)    | 1,054132 | 2,71675E-05 |
| C1G2H7      | MYG1 protein                                              | UP (8W)  | 1,053521 | 0,006800777 |
| C1GCN9      | mannosyl-oligosaccharide glucosidase [EC:3.2.1.106]       | UP(D)    | 1,052265 | 0,000955992 |
| C1GF61      | seryl-tRNA synthetase [EC:6.1.1.11]                       | UP(D)    | 1,049551 | 0,000159309 |
| C1G4I3      | obg-like ATPase 1                                         | UP (8W)  | 1,047117 | 0,003306043 |
| C1GG12      | glutaminyl-tRNA synthetase [EC:6.1.1.18]                  | UP(D)    | 1,042749 | 3,96715E-05 |
| C1GF71      | histone H2B                                               | UP (12W) | 1,041082 | 0,018150971 |
| C1GB62      | leucyl-tRNA synthetase [EC:6.1.1.4]                       | UP (12W) | 1,037888 | 0,034503547 |
| C1GL98      | polyadenylate-binding protein                             | UP (8W)  | 1,033177 | 0,01466991  |
| C1GD28      | protein transport protein SEC13                           | UP (12W) | 1,027963 | 0,010753681 |
| C1GLI9      | elongation factor 2                                       | UP(D)    | 1,027267 | 2,03704E-05 |
| C1G0I9      | Glucosidase 2 subunit beta                                | UP (8W)  | 1,026761 | 0,035158003 |
| C1GCZ3      | UDP-glucose:glycoprotein glucosyltransferase [EC:2.4.1.-] | UP (8W)  | 1,026419 | 0,044426383 |
| C1GMJ8      | T-complex protein 1 subunit epsilon                       | UP(D)    | 1,022092 | 9,19141E-05 |
| C1G5V0      | Nucleic acid-binding protein                              | UP (8W)  | 1,019347 | 0,030843909 |
| C1GG28      | elongation factor 1-gamma                                 | UP(D)    | 1,018335 | 7,5032E-05  |
| A0A0A0HUI8  | Histone H2A.Z                                             | UP (12W) | 1,013555 | 0,032627654 |
| C1FZI7      | Vacuolar protein sorting/targeting protein 10             | UP (12W) | 1,010704 | 0,040518217 |
| C1GL41      | T-complex protein 1 subunit beta                          | UP (8W)  | 1,010658 | 0,039335286 |
| C1G4I4      | Translation machinery-associated protein 20               | UP (12W) | 1,007096 | 0,048940396 |
| C1FYD3      | UBC core domain-containing protein                        | UP(D)    | 1,006869 | 0,000587855 |
| C1GA62      | alpha-mannosidase [EC:3.2.1.24]                           | UP(D)    | 1,000186 | 5,48833E-05 |
| C1G8H6      | endoplasmic reticulum chaperone BiP [EC:3.6.4.10]         | UP(D)    | 0,998596 | 0,000423833 |
| C1FYK2      | isoleucyl-tRNA synthetase [EC:6.1.1.5]                    | UP(D)    | 0,997139 | 0,000437759 |
| C1G6R0      | protein SSD1                                              | UP (12W) | 0,991494 | 0,034781743 |
| C1GJL2      | cysteinyl-tRNA synthetase [EC:6.1.1.16]                   | UP(D)    | 0,988661 | 0,000462567 |
| C1G8B2      | syntaxin 8                                                | UP (12W) | 0,984268 | 0,038765677 |
| C1GB82      | protein transport protein SEC24                           | UP(D)    | 0,980118 | 0,00066464  |
| C1G9Z7      | translation initiation factor 2 subunit 3                 | UP (12W) | 0,979993 | 0,032572703 |
| C1G6R9      | protein mago nashi                                        | UP (8W)  | 0,979824 | 0,034729177 |
| C1GDY2      | U2 small nuclear ribonucleoprotein A'                     | UP (8W)  | 0,970768 | 0,034729177 |

|            |                                                                                  |          |          |             |
|------------|----------------------------------------------------------------------------------|----------|----------|-------------|
| C1G349     | protein disulfide-isomerase<br>[EC:5.3.4.1]                                      | UP (12W) | 0,961615 | 0,01806641  |
| C1GI40     | serine incorporator 1                                                            | UP (12W) | 0,959496 | 0,026955327 |
| C1GLI2     | heat shock 70kDa protein 1/2/6/8                                                 | UP(D)    | 0,959262 | 0,000118    |
| C1GJ52     | phospholipase A-2-activating protein                                             | UP (8W)  | 0,954214 | 0,01254854  |
| C1GMI6     | lysyl-tRNA synthetase, class II<br>[EC:6.1.1.6]                                  | UP(D)    | 0,952846 | 0,000534774 |
| C1G4T3     | elongation factor Tu                                                             | UP (12W) | 0,947064 | 0,010753681 |
| C1G6I0     | heat shock 70kDa protein 4                                                       | UP(D)    | 0,943117 | 0,000143959 |
| C1G7B9     | transcription elongation factor SPT5                                             | UP(D)    | 0,929019 | 0,000293052 |
| C1FYQ2     | T-complex protein 1 subunit gamma                                                | UP(D)    | 0,924727 | 3,69337E-05 |
| C1G1H8     | histone chaperone ASF1                                                           | UP(D)    | 0,915864 | 0,000823078 |
| C1FZL0     | T-complex protein 1 subunit delta                                                | UP(D)    | 0,904342 | 1,62924E-05 |
| C1FZG2     | alanyl-tRNA synthetase [EC:6.1.1.7]                                              | UP(D)    | 0,903844 | 0,000882487 |
| C1G554     | ubiquitin-activating enzyme E1<br>[EC:6.2.1.45]                                  | UP (8W)  | 0,902624 | 0,030843909 |
| C1G9A3     | Uracil-DNA glycosylase                                                           | UP(D)    | 0,901583 | 0,000252883 |
| C1G3P2     | histidyl-tRNA synthetase [EC:6.1.1.21]                                           | UP(D)    | 0,895699 | 0,001465654 |
| C1G571     | T-complex protein 1 subunit alpha                                                | UP(D)    | 0,893508 | 0,000175009 |
| C1G6U0     | ATP-dependent Clp protease ATP-binding subunit ClpB                              | UP (8W)  | 0,891804 | 0,025121662 |
| C1G8E5     | peptide chain release factor subunit 3                                           | UP(D)    | 0,885301 | 0,000709328 |
| C1GJZ7     | small subunit ribosomal protein S21e                                             | UP (8W)  | 0,883043 | 0,01634925  |
| A0A0A0HUX3 | Proliferating cell nuclear antigen                                               | UP (8W)  | 0,880445 | 0,04645427  |
| C1G391     | small subunit ribosomal protein S3e                                              | UP(D)    | 0,870084 | 3,07307E-05 |
| C1GFY2     | ADP-ribose 1''-phosphate phosphatase                                             | UP (8W)  | 0,867321 | 0,019249059 |
| C1G514     | Hsp90 chaperone protein kinase-targeting subunit                                 | UP (8W)  | 0,858898 | 0,043289385 |
| C1GLJ3     | T-complex protein 1 subunit eta                                                  | UP(D)    | 0,857928 | 0,000330967 |
| C1GF57     | nucleosome assembly protein 1-like 1                                             | UP (12W) | 0,856219 | 0,038574499 |
| C1G632     | ubiquitin-conjugating enzyme (huntingtin interacting protein 2)<br>[EC:2.3.2.23] | UP (12W) | 0,855249 | 0,038393014 |
| C1GKC9     | molecular chaperone HtpG                                                         | UP(D)    | 0,84908  | 0,000395866 |
| C1G1B6     | Non-histone chromosomal protein 6                                                | UP (8W)  | 0,844169 | 0,030843909 |
| C1G9T0     | translation initiation factor 3 subunit A                                        | UP(D)    | 0,843625 | 8,26625E-05 |
| C1G741     | LsmAD domain-containing protein                                                  | UP (12W) | 0,818457 | 0,04712458  |
| C1GLA9     | translation initiation factor 5B                                                 | UP(D)    | 0,798049 | 0,000175009 |
| C1GGR5     | small subunit ribosomal protein S20e                                             | UP (8W)  | 0,793211 | 0,018011162 |
| C1GF12     | glycyl-tRNA synthetase [EC:6.1.1.14]                                             | UP(D)    | 0,788962 | 0,000297057 |
| A0A0A0HYV6 | large subunit ribosomal protein L5e                                              | UP (8W)  | 0,78714  | 0,033696224 |
| C1GC92     | prohibitin 1                                                                     | UP (12W) | 0,771972 | 0,021736563 |
| C1G9A5     | protein disulfide-isomerase A1<br>[EC:5.3.4.1]                                   | UP(D)    | 0,743746 | 0,000242791 |
| C1GGQ1     | peptidyl-prolyl isomerase D<br>[EC:5.2.1.8]                                      | UP (8W)  | 0,733369 | 0,027076205 |

|                  |                                                                                        |          |          |             |
|------------------|----------------------------------------------------------------------------------------|----------|----------|-------------|
| C1GKM9           | protein disulfide-isomerase A6<br>[EC:5.3.4.1]                                         | UP(D)    | 0,715722 | 0,000379134 |
| C1G6W9           | protein LSM14                                                                          | UP (12W) | 0,672222 | 0,048940396 |
| <b>Transport</b> |                                                                                        |          |          |             |
| C1GGG3           | Phosphate transporter                                                                  | UP (12W) | 2,442638 | 0,044193099 |
| C1G0S7           | EF-hand domain-containing protein                                                      | UP (12W) | 1,665559 | 0,010753681 |
| C1GAX4           | ATP-binding cassette, subfamily B,<br>vacuolar membrane transporter<br>HMT1/ACLQ       | UP (12W) | 1,635563 | 0,043449634 |
| C1G5L4           | dynein cytoplasmic 1 intermediate<br>chain                                             | UP (12W) | 1,458331 | 0,021736563 |
| C1GF89           | Mitochondrial thiamine<br>pyrophosphate carrier 1                                      | UP (8W)  | 1,45395  | 0,005815857 |
| C1FYM2           | vesicle-fusing ATPase [EC:3.6.4.6]                                                     | UP(D)    | 1,245729 | 8,26625E-05 |
| C1GE52           | actin-related protein 3                                                                | UP(D)    | 1,237219 | 0,001837096 |
| C1G6Y4           | carnitine O-acetyltransferase<br>[EC:2.3.1.7]                                          | UP (12W) | 1,189555 | 0,010753681 |
| C1GHE5           | importin subunit beta-1                                                                | UP(D)    | 1,187745 | 0,000620203 |
| C1G819           | solute carrier family 25, member<br>33/36                                              | UP (8W)  | 1,13966  | 0,028162637 |
| C1GLV2           | solute carrier family 25 (peroxisomal<br>adenine nucleotide transporter),<br>member 17 | UP (8W)  | 1,041889 | 0,018887049 |
| C1GGI3           | Golgi transport protein Sly1                                                           | UP (8W)  | 1,018161 | 0,046317235 |
| C1G3T6           | P-type Na <sup>+</sup> /K <sup>+</sup> transporter [EC:7.2.2.3<br>7.2.2.-]             | UP (12W) | 1,016642 | 0,025234124 |
| C1G635           | ATP-binding cassette, subfamily F,<br>member 2                                         | UP(D)    | 0,990747 | 0,000529237 |
| C1G750           | Dynein light chain                                                                     | UP (12W) | 0,983748 | 0,018150971 |
| C1GEX3           | ATP-binding cassette, subfamily C<br>(CFTR/MRP), member 1 [EC:7.6.2.3]                 | UP(D)    | 0,977466 | 0,000651657 |
| A0A0A0HW80       | vacuolar iron transporter family<br>protein                                            | UP(D)    | 0,970404 | 0,000224532 |
| C1G8G5           | capping protein (actin filament)<br>muscle Z-line, alpha                               | UP(D)    | 0,969929 | 0,001813377 |
| C1GID7           | carnitine O-acetyltransferase<br>[EC:2.3.1.7]                                          | UP(D)    | 0,952259 | 0,000175009 |
| C1G6X9           | High-affinity methionine permease                                                      | UP (8W)  | 0,940089 | 0,027543958 |
| C1G1D8           | oxysterol-binding protein-related<br>protein 9/10/11                                   | UP(D)    | 0,936698 | 0,001839063 |
| C1GBG4           | coatamer subunit gamma                                                                 | UP(D)    | 0,935058 | 8,00793E-05 |
| C1FZH6           | dynamin 1-like protein [EC:3.6.5.5]                                                    | UP (8W)  | 0,910345 | 0,020249279 |
| C1GLM2           | voltage-dependent anion channel<br>protein 2                                           | UP (12W) | 0,907959 | 0,03059419  |
| A0A0A0HWS3       | vacuolar protein sorting-associated<br>protein 1                                       | UP(D)    | 0,903541 | 0,000203639 |
| A0A0A0HT88       | Long-chain fatty acid transporter                                                      | UP (8W)  | 0,868167 | 0,018215419 |
| C1GIB2           | protein transport protein SEC31                                                        | UP(D)    | 0,865188 | 0,000330967 |
| C1GA14           | clathrin heavy chain                                                                   | UP (12W) | 0,859461 | 0,034014219 |

|                          |                                                                                           |          |          |             |
|--------------------------|-------------------------------------------------------------------------------------------|----------|----------|-------------|
| C1FZ88                   | importin subunit alpha-6/7                                                                | UP(D)    | 0,838203 | 0,000322749 |
| C1G9E6                   | mitochondrial import inner membrane translocase subunit TIM10                             | UP(D)    | 0,831546 | 0,001599547 |
| C1G8G0                   | importin-4                                                                                | UP (12W) | 0,830463 | 0,035118646 |
| C1G4B9                   | mitochondrial import inner membrane translocase subunit TIM54                             | UP (8W)  | 0,821235 | 0,037862655 |
| C1GAF5                   | coatomer subunit alpha                                                                    | UP(D)    | 0,787953 | 0,001225385 |
| A0A0A0HWM5               | mitochondrial import receptor subunit TOM70                                               | UP(D)    | 0,763927 | 0,002096976 |
| C1G6U8                   | P-type Ca <sup>2+</sup> transporter type 2C [EC:7.2.2.10]                                 | UP (12W) | 0,763312 | 0,035368073 |
| C1G3C4                   | solute carrier family 25 (mitochondrial adenine nucleotide translocator), member 4/5/6/31 | UP(D)    | 0,740206 | 0,000267021 |
| C1GB16                   | mitochondrial import inner membrane translocase subunit TIM50                             | UP (12W) | 0,721871 | 0,042111956 |
| <b>Other metabolisms</b> |                                                                                           |          |          |             |
| A0A0A0HQV2               | NAD(P)H-hydrate epimerase [EC:5.1.99.6]                                                   | UP (8W)  | 3,062277 | 0,00918935  |
| A0A0A0HWR3               | phosphoribosylformylglycinamide synthase [EC:6.3.5.3]                                     | UP (8W)  | 1,833492 | 0,018011162 |
| C1GMH1                   | biotin synthase [EC:2.8.1.6]                                                              | UP(D)    | 1,751156 | 0,000224532 |
| C1GAV1                   | Nicotinamidase                                                                            | UP (12W) | 1,741082 | 0,037489965 |
| C1G168                   | succinate---hydroxymethylglutarate CoA-transferase [EC:2.8.3.13]                          | UP(D)    | 1,573543 | 0,000385662 |
| A0A0A0HR31               | phosphoribosylaminoimidazole carboxylase [EC:4.1.1.21]                                    | UP (12W) | 1,465811 | 0,034368589 |
| C1G0E1                   | urate oxidase [EC:1.7.3.3]                                                                | UP (8W)  | 1,446694 | 0,016560411 |
| C1GCJ6                   | 2-methylcitrate dehydratase [EC:4.2.1.79]                                                 | UP (8W)  | 1,442844 | 0,013650279 |
| C1GCX5                   | glycine hydroxymethyltransferase [EC:2.1.2.1]                                             | UP(D)    | 1,436739 | 2,03704E-05 |
| C1FYK8                   | cyclin-dependent kinase [EC:2.7.11.22]                                                    | UP (8W)  | 1,409371 | 0,014049764 |
| C1GFX8                   | manganese-transporting P-type ATPase [EC:7.2.2.-]                                         | UP (12W) | 1,395128 | 0,009555529 |
| C1G7B2                   | glutaminy-peptide cyclotransferase [EC:2.3.2.5]                                           | UP (8W)  | 1,385701 | 0,02857375  |
| C1G5I8                   | carbamoyl-phosphate synthase large subunit [EC:6.3.5.5]                                   | UP (8W)  | 1,374854 | 0,011719078 |
| C1GLI4                   | glucosamine-phosphate N-acetyltransferase [EC:2.3.1.4]                                    | UP (8W)  | 1,368562 | 0,02090407  |
| C1GBS0                   | carbamoyl-phosphate synthase / aspartate carbamoyltransferase [EC:6.3.5.5 2.1.3.2]        | UP(D)    | 1,331486 | 0,000835911 |
| C1G7D5                   | Pantetheine-phosphate adenyltransferase                                                   | UP (12W) | 1,312928 | 0,045542537 |
| C1GDH9                   | extracellular matrix protein 14 [EC:3.4.17.-]                                             | UP (8W)  | 1,321069 | 0,0056646   |
| C1GKQ4                   | chitin synthase [EC:2.4.1.16]                                                             | UP (12W) | 1,144736 | 0,021736563 |

|            |                                                                                                      |          |          |             |
|------------|------------------------------------------------------------------------------------------------------|----------|----------|-------------|
| C1G9D5     | urease [EC:3.5.1.5]                                                                                  | UP (8W)  | 1,312536 | 0,011082888 |
| C1GB78     | uroporphyrinogen-III synthase [EC:4.2.1.75]                                                          | UP (8W)  | 1,31213  | 0,008729208 |
| C1G5Z2     | acetyl-CoA hydrolase [EC:3.1.2.1]                                                                    | UP (8W)  | 1,283635 | 0,028211518 |
| C1GBF1     | AFG3 family protein [EC:3.4.24.-]                                                                    | UP (8W)  | 1,243799 | 0,006412745 |
| C1GEY6     | pyridoxal 5'-phosphate synthase pdxS subunit [EC:4.3.3.6]                                            | UP (8W)  | 1,240117 | 0,00687719  |
| C1FYF6     | adenylosuccinate synthase [EC:6.3.4.4]                                                               | UP (8W)  | 1,222841 | 0,014400463 |
| C1FYZ8     | Epoxide hydrolase                                                                                    | UP (12W) | 1,221769 | 0,041170587 |
| C1G5S1     | Glutathione S-transferase kappa                                                                      | UP (8W)  | 1,187116 | 0,037383913 |
| A0A0A0HSU0 | insulysin [EC:3.4.24.56]                                                                             | UP (12W) | 1,166518 | 0,043130713 |
| C1G0X3     | 2-succinylbenzoate-CoA ligase                                                                        | UP(D)    | 1,16117  | 0,000107991 |
| C1G0D4     | catalase [EC:1.11.1.6]                                                                               | UP(D)    | 1,14811  | 0,000692846 |
| C1G7R6     | metallopeptidase MepB [EC:3.4.24.-]                                                                  | UP (8W)  | 1,141494 | 0,005516536 |
| C1G0S4     | biotin--protein ligase [EC:6.3.4.9 6.3.4.10 6.3.4.11 6.3.4.15]                                       | UP(D)    | 1,126305 | 0,000889849 |
| C1GCZ0     | Allantoinase                                                                                         | UP (8W)  | 1,115062 | 0,04023474  |
| C1GAY4     | peptide-methionine (S)-S-oxide reductase [EC:1.8.4.11]                                               | UP (8W)  | 1,094903 | 0,005276659 |
| C1GEY4     | Xaa-Pro aminopeptidase [EC:3.4.11.9]                                                                 | UP (8W)  | 1,08198  | 0,007353391 |
| A0A0A0HTY3 | 1,4-alpha-glucan branching enzyme [EC:2.4.1.18]                                                      | UP (8W)  | 1,064572 | 0,008670622 |
| C1GA13     | phosphoribosylaminoimidazolecarboxamide formyltransferase / IMP cyclohydrolase [EC:2.1.2.3 3.5.4.10] | UP(D)    | 1,055029 | 0,00054087  |
| C1GA17     | pyruvate carboxylase [EC:6.4.1.1]                                                                    | UP(D)    | 1,021473 | 4,70896E-05 |
| C1G167     | riboflavin synthase [EC:2.5.1.9]                                                                     | UP (8W)  | 1,005041 | 0,013621638 |
| C1GIX8     | precorrin-2 dehydrogenase / sirohydrochlorin ferrochelataze [EC:1.3.1.76 4.99.1.4]                   | UP(D)    | 0,992198 | 0,000159309 |
| C1GLG2     | adenylate kinase [EC:2.7.4.3]                                                                        | UP(D)    | 0,985231 | 0,000811179 |
| C1GHS5     | Amidase                                                                                              | UP (12W) | 0,980662 | 0,021736563 |
| C1GAT8     | UTP--glucose-1-phosphate uridylyltransferase [EC:2.7.7.9]                                            | UP(D)    | 0,978168 | 0,000108069 |
| C1GB27     | adenylosuccinate lyase [EC:4.3.2.2]                                                                  | UP(D)    | 0,977705 | 0,000308052 |
| C1G7J4     | aminopeptidase 2 [EC:3.4.11.-]                                                                       | UP(D)    | 0,968431 | 0,000127385 |
| C1G7L5     | arylesterase / paraoxonase [EC:3.1.1.2 3.1.8.1]                                                      | UP(D)    | 0,955125 | 0,000231128 |
| C1GD24     | dipeptidyl-peptidase III [EC:3.4.14.4]                                                               | UP(D)    | 0,954726 | 0,00107244  |
| C1G164     | phosphoacetylglucosamine mutase [EC:5.4.2.3]                                                         | UP (8W)  | 0,90123  | 0,034875515 |
| C1GBQ7     | chorismate mutase [EC:5.4.99.5]                                                                      | UP (12W) | 0,90117  | 0,025552362 |
| C1GD57     | Xaa-Pro dipeptidase [EC:3.4.13.9]                                                                    | UP(D)    | 0,894158 | 0,000352749 |
| C1GGV9     | Aminopeptidase                                                                                       | UP(D)    | 0,870813 | 0,000268322 |
| C1G9D6     | cytochrome-b5 reductase [EC:1.6.2.2]                                                                 | UP (8W)  | 0,84809  | 0,031954553 |
| C1G713     | H+-translocating NAD(P) transhydrogenase [EC:1.6.1.2 7.1.1.1]                                        | UP (12W) | 0,840913 | 0,01806641  |

|                            |                                                              |           |          |             |
|----------------------------|--------------------------------------------------------------|-----------|----------|-------------|
| C1GML7                     | phosphoenolpyruvate carboxykinase (ATP) [EC:4.1.1.49]        | UP (8W)   | 0,831839 | 0,01155815  |
| C1G9K7                     | phosphomannomutase [EC:5.4.2.8]                              | UP (8W)   | 0,822025 | 0,02090407  |
| C1FYN6                     | UDP-galactopyranose mutase                                   | UP (12W)  | 0,799344 | 0,021736563 |
| C1G8F8                     | Ser/Thr protein phosphatase                                  | UP (12W)  | 0,75944  | 0,044193099 |
| C1G215                     | Phosphoglycolate phosphatase                                 | UP (8W)   | 0,686611 | 0,035573455 |
| C1G7T4                     | ATP-dependent Lon protease [EC:3.4.21.53]                    | UP (12W)  | 0,659998 | 0,041170587 |
| C1GIJ3                     | Murein transglycosylase                                      | DOWN (8W) | -1,77496 | 0,044788211 |
| <b>Cell cycle</b>          |                                                              |           |          |             |
| C1GA76                     | structural maintenance of chromosome 1                       | UP(D)     | 1,901341 | 0,000243877 |
| C1GL30                     | Velvet domain-containing protein                             | UP (12W)  | 1,379177 | 0,021989098 |
| C1GJ83                     | cell division control protein 11                             | UP(D)     | 1,172387 | 4,61283E-05 |
| C1GIH4                     | septin 7                                                     | UP(D)     | 1,141771 | 0,00018346  |
| C1G389                     | serine/threonine-protein phosphatase 2A regulatory subunit A | UP (12W)  | 1,128973 | 0,013179723 |
| C1GEM8                     | cell division control protein 12                             | UP(D)     | 1,115969 | 3,69337E-05 |
| C1G994                     | ANAPC4_WD40 domain-containing protein                        | UP(D)     | 1,095215 | 3,96715E-05 |
| C1GCT8                     | GTP-binding nuclear protein Ran                              | UP(D)     | 0,985808 | 7,68103E-05 |
| <b>Signal transduction</b> |                                                              |           |          |             |
| C1GDE6                     | GTPase KRas                                                  | UP(D)     | 1,464659 | 0,000330967 |
| C1GF62                     | Rheb small monomeric GTPase RhbA                             | UP (12W)  | 1,330107 | 0,044193099 |
| C1GKC8                     | Ras GTPase-activating protein-binding protein 2              | UP (8W)   | 1,079013 | 0,034445052 |
| C1FZF8                     | Rho-GTPase-activating protein                                | UP (12W)  | 1,06306  | 0,029656674 |
| C1GLV1                     | Ras-related protein Rab-1A                                   | UP(D)     | 0,944363 | 0,000190119 |
| C1G2S7                     | Rab GDP dissociation inhibitor                               | UP (8W)   | 0,915304 | 0,02857375  |
| C1GB04                     | 14-3-3 protein epsilon                                       | UP(D)     | 0,89245  | 0,000108499 |
| C1GEA4                     | AGC/PKC protein kinase                                       | UP (12W)  | 0,808043 | 0,021989098 |
| <b>Cytoskeleton</b>        |                                                              |           |          |             |
| C1GM22;C1G3F2              | Tubulin alpha chain                                          | UP (12W)  | 1,610509 | 0,01806641  |
| C1FZT8                     | tubulin alpha                                                | UP (12W)  | 1,011304 | 0,018150971 |
| C1GFT4                     | Cytoskeleton assembly control protein                        | UP(D)     | 0,928838 | 0,000192526 |
| C1GJ13                     | coronin-1B/1C/6                                              | UP (12W)  | 0,811961 | 0,018150971 |
| C1GDK5                     | Fimbrin                                                      | UP(D)     | 0,765673 | 0,00029774  |
| <b>No annotation found</b> |                                                              |           |          |             |
| C1G2U9                     | NA                                                           | UP (8W)   | 2,212297 | 0,011412341 |
| C1GIP9                     | NA                                                           | UP (12W)  | 2,116714 | 0,028013083 |
| C1G7I0                     | NA                                                           | UP(D)     | 1,78265  | 0,000133721 |
| C1G6F3                     | NA                                                           | UP (8W)   | 1,769059 | 0,015915364 |
| C1GAT1                     | Amidase                                                      | UP (12W)  | 1,634443 | 0,007951887 |
| C1G422                     | NA                                                           | UP (8W)   | 1,597073 | 0,02857375  |
| C1G379                     | NA                                                           | UP (8W)   | 1,579459 | 0,041534769 |

|        |                                     |          |          |             |
|--------|-------------------------------------|----------|----------|-------------|
| C1G5X0 | Carrier domain-containing protein   | UP(D)    | 1,512006 | 0,000258272 |
| C1G2F0 | NA                                  | UP (12W) | 1,51143  | 0,045189178 |
| C1GA00 | NA                                  | UP (8W)  | 1,490337 | 0,008977012 |
| C1G0C9 | NA                                  | UP (12W) | 1,484294 | 0,021989098 |
| C1G6Q3 | NA                                  | UP (8W)  | 1,340086 | 0,024125416 |
| C1GFT1 | NA                                  | UP (12W) | 1,228773 | 0,043449634 |
| C1G4G5 | uncharacterized protein             | UP (12W) | 1,176648 | 0,03059419  |
| C1GBH7 | NA                                  | UP (12W) | 1,142773 | 0,03646764  |
| C1GK41 | NA                                  | UP(D)    | 1,11431  | 0,000567838 |
| C1GJH6 | NA                                  | UP (8W)  | 1,061917 | 0,018238692 |
| C1G101 | NA                                  | UP (8W)  | 1,061851 | 0,022464047 |
| C1FYH3 | NA                                  | UP(D)    | 1,000493 | 0,000711383 |
| C1GHL9 | NA                                  | UP(D)    | 0,958979 | 0,001050039 |
| C1GJH8 | NA                                  | UP (8W)  | 0,933274 | 0,040972086 |
| C1GMJ4 | RING-type domain-containing protein | UP (12W) | 0,911585 | 0,039029295 |
| C1GBD3 | NA                                  | UP(D)    | 0,840433 | 0,000190119 |
| C1GES0 | apoptosis-inducing factor 2         | UP (12W) | 0,781637 | 0,021736563 |
| C1G8P5 | NA                                  | UP (12W) | 0,778281 | 0,034503547 |
| C1G647 | NA                                  | UP (12W) | 0,761338 | 0,041170587 |
| C1GFJ7 | NA                                  | UP (12W) | 0,748749 | 0,021736563 |
| C1G3V2 | NA                                  | UP (12W) | 0,747881 | 0,048940396 |
| C1GAY7 | NA                                  | UP (8W)  | 0,727696 | 0,032954605 |
